# Supplementary material for: The transcriptional landscape of Rhizoctonia solani AG1-IA during infection of soybean as defined by RNA-seq
Source: PLoS One. 2017 Sep 6;12(9):e0184095. doi: 10.1371/journal.pone.0184095 (PMC5587340; doi:10.1371/journal.pone.0184095)
Supplement: S2 Table — (XLSX) [file pone.0184095.s002.xlsx]

## Sheet: Sheet1
S2 Table. KEGG pathway E.C. numbers associated with genes expressed 24 h.p.o. of necrosis
[1] KEGG E.C. numbers can be input into the KEGG pathway for visualization. Colour visualization is possible via the KEGG pathway search and color pathway tool available at: http://www.kegg.jp/kegg/tool/map_pathway2.html
[2] Gene expression coloured by significantly up-regulated (red), down-regulated (green) or not differentially expressed (blue) genes 24 h.p.o. of necrosis in leaf samples compared to in vitro controls
Pathway fluctuations can be visualized by copy-pasting the information in the table into the space provided on the KEGG website link
E.C. number [1]	Expression [2]
ec:1.1.1.145	blue
ec:1.1.1.169	blue
ec:1.1.1.205	blue
ec:1.1.1.23	blue
ec:1.1.1.25	green
ec:1.1.1.282	green
ec:1.1.1.3	red
ec:1.1.1.34	red
ec:1.1.1.34	blue
ec:1.1.1.35	blue
ec:1.1.1.37	blue
ec:1.1.1.38	blue
ec:1.1.1.39	blue
ec:1.1.1.41	red
ec:1.1.1.42	blue
ec:1.1.1.44	red
ec:1.1.1.49	blue
ec:1.1.1.8	blue
ec:1.1.1.85	red
ec:1.1.1.86	red
ec:1.1.1.94	blue
ec:1.1.5.3	blue
ec:1.10.2.2	red
ec:1.11.1.6	green
ec:1.11.1.7	blue
ec:1.11.1.9	blue
ec:1.13.11.5	blue
ec:1.13.11.54	blue
ec:1.13.11.6	blue
ec:1.13.12.16	red
ec:1.13.99.1	blue
ec:1.14.13.8	green
ec:1.14.19.1	blue
ec:1.17.4.1	blue
ec:1.2.1.11	blue
ec:1.2.1.27	blue
ec:1.2.1.31	blue
ec:1.2.1.38	blue
ec:1.2.4.1	blue
ec:1.2.4.2	red
ec:1.3.1.12	blue
ec:1.3.1.13	blue
ec:1.3.1.76	blue
ec:1.3.1.9	blue
ec:1.3.3.3	blue
ec:1.3.3.4	blue
ec:1.3.3.6	blue
ec:1.3.5.1	blue
ec:1.3.5.2	blue
ec:1.4.1.14	blue
ec:1.4.3.21	blue
ec:1.4.3.3	red
ec:1.4.3.5	red
ec:1.4.4.2	blue
ec:1.5.1.2	blue
ec:1.5.1.20	red
ec:1.5.1.5	red
ec:1.6.1.2	blue
ec:1.6.2.2	blue
ec:1.6.5.3	blue
ec:1.7.1.4	blue
ec:1.7.3.3	blue
ec:1.8.1.4	blue
ec:1.8.1.9	blue
ec:1.8.3.5	blue
ec:1.8.4.8	blue
ec:1.9.3.1	blue
ec:2.1.1.14	red
ec:2.1.1.41	blue
ec:2.1.1.43	blue
ec:2.1.1.45	red
ec:2.1.2.1	red
ec:2.1.2.10	blue
ec:2.1.2.11	blue
ec:2.1.2.3	red
ec:2.1.3.2	red
ec:2.2.1.1	red
ec:2.2.1.2	blue
ec:2.2.1.6	red
ec:2.3.1.1	blue
ec:2.3.1.12	blue
ec:2.3.1.31	blue
ec:2.3.1.35	blue
ec:2.3.1.37	blue
ec:2.3.1.51	blue
ec:2.3.2.2	red
ec:2.3.3.1	red
ec:2.3.3.10	blue
ec:2.3.3.14	blue
ec:2.3.3.9	blue
ec:2.4.1.1	green
ec:2.4.1.109	blue
ec:2.4.1.11	red
ec:2.4.1.144	blue
ec:2.4.1.16	blue
ec:2.4.1.198	blue
ec:2.4.1.25	red
ec:2.4.1.34	blue
ec:2.4.2.1	blue
ec:2.4.2.10	blue
ec:2.4.2.14	blue
ec:2.4.2.17	blue
ec:2.4.2.18	green
ec:2.4.2.19	blue
ec:2.4.2.28	blue
ec:2.5.1.18	green
ec:2.5.1.19	red
ec:2.5.1.19	blue
ec:2.5.1.3	blue
ec:2.5.1.54	blue
ec:2.5.1.6	red
ec:2.5.1.61	blue
ec:2.6.1.1	blue
ec:2.6.1.16	red
ec:2.6.1.42	blue
ec:2.6.1.5	blue
ec:2.6.1.52	blue
ec:2.6.1.57	blue
ec:2.6.1.9	red
ec:2.7.1.1	red
ec:2.7.1.105	blue
ec:2.7.1.11	blue
ec:2.7.1.127	blue
ec:2.7.1.20	red
ec:2.7.1.23	blue
ec:2.7.1.24	blue
ec:2.7.1.25	red
ec:2.7.1.26	blue
ec:2.7.1.29	blue
ec:2.7.1.35	blue
ec:2.7.1.39	red
ec:2.7.1.40	blue
ec:2.7.1.48	blue
ec:2.7.1.50	blue
ec:2.7.1.6	blue
ec:2.7.11.24	blue
ec:2.7.2.1	blue
ec:2.7.2.11	blue
ec:2.7.2.3	blue
ec:2.7.2.4	red
ec:2.7.2.8	blue
ec:2.7.4.14	red
ec:2.7.4.3	red
ec:2.7.4.6	red
ec:2.7.4.7	blue
ec:2.7.4.9	blue
ec:2.7.6.1	red
ec:2.7.6.3	red
ec:2.7.7.1	blue
ec:2.7.7.12	red
ec:2.7.7.4	red
ec:2.7.7.41	blue
ec:2.7.7.53	blue
ec:2.7.7.6	green
ec:2.7.7.7	blue
ec:2.7.8.13	blue
ec:2.7.8.7	blue
ec:2.8.1.6	red
ec:2.8.1.7	blue
ec:2.8.1.8	blue
ec:3.1.1.1	red
ec:3.1.1.11	red
ec:3.1.1.3	blue
ec:3.1.1.31	blue
ec:3.1.1.47	blue
ec:3.1.1.5	red
ec:3.1.2.22	green
ec:3.1.3.1	red
ec:3.1.3.11	blue
ec:3.1.3.16	blue
ec:3.1.3.2	red
ec:3.1.3.41	blue
ec:3.1.4.11	blue
ec:3.1.4.17	blue
ec:3.2.1.1	blue
ec:3.2.1.106	red
ec:3.2.1.113	blue
ec:3.2.1.14	red
ec:3.2.1.15	green
ec:3.2.1.22	blue
ec:3.2.1.24	blue
ec:3.2.1.28	green
ec:3.2.1.3	green
ec:3.2.1.33	red
ec:3.2.1.4	red
ec:3.2.1.45	blue
ec:3.2.1.51	blue
ec:3.2.1.55	red
ec:3.3.1.1	red
ec:3.5.1.2	blue
ec:3.5.1.5	blue
ec:3.5.2.3	blue
ec:3.5.3.4	blue
ec:3.5.4.10	red
ec:3.5.4.16	red
ec:3.5.4.16	blue
ec:3.5.4.19	blue
ec:3.5.4.3	blue
ec:3.5.4.5	blue
ec:3.5.99.6	blue
ec:3.6.1.1	red
ec:3.6.1.15	blue
ec:3.6.1.19	red
ec:3.6.1.3	blue
ec:3.6.1.31	blue
ec:3.6.3.6	blue
ec:4.1.1.15	red
ec:4.1.1.21	blue
ec:4.1.1.23	blue
ec:4.1.1.33	red
ec:4.1.1.37	blue
ec:4.1.1.49	blue
ec:4.1.1.50	red
ec:4.1.1.65	green
ec:4.1.2.13	red
ec:4.1.2.25	red
ec:4.1.2.4	blue
ec:4.1.3.1	blue
ec:4.1.3.4	blue
ec:4.1.99.12	blue
ec:4.2.1.1	blue
ec:4.2.1.10	green
ec:4.2.1.11	blue
ec:4.2.1.19	blue
ec:4.2.1.20	blue
ec:4.2.1.24	blue
ec:4.2.1.3	blue
ec:4.2.1.33	red
ec:4.2.1.36	blue
ec:4.2.1.47	red
ec:4.2.1.51	blue
ec:4.2.1.75	blue
ec:4.2.1.79	red
ec:4.2.2.2	blue
ec:4.3.1.19	blue
ec:4.3.1.24	green
ec:4.3.1.25	green
ec:4.3.2.1	red
ec:4.3.2.3	blue
ec:4.4.1.17	blue
ec:4.4.1.5	blue
ec:4.4.1.8	blue
ec:4.99.1.1	blue
ec:5.1.3.2	blue
ec:5.3.1.1	blue
ec:5.3.1.23	red
ec:5.3.1.6	blue
ec:5.3.1.8	red
ec:5.3.1.9	blue
ec:5.3.3.2	red
ec:5.3.3.5	green
ec:5.4.2.8	blue
ec:5.4.99.5	green
ec:5.5.1.4	blue
ec:6.1.1.10	red
ec:6.1.1.11	blue
ec:6.1.1.12	red
ec:6.1.1.14	blue
ec:6.1.1.15	red
ec:6.1.1.18	blue
ec:6.1.1.19	green
ec:6.1.1.2	blue
ec:6.1.1.20	blue
ec:6.1.1.22	blue
ec:6.1.1.3	blue
ec:6.1.1.4	red
ec:6.1.1.5	red
ec:6.1.1.6	red
ec:6.1.1.7	blue
ec:6.1.1.9	red
ec:6.2.1.1	red
ec:6.3.1.2	blue
ec:6.3.2.1	blue
ec:6.3.2.17	red
ec:6.3.2.2	blue
ec:6.3.2.3	blue
ec:6.3.2.6	red
ec:6.3.3.1	red
ec:6.3.4.13	red
ec:6.3.4.2	red
ec:6.3.4.3	red
ec:6.3.4.4	blue
ec:6.3.4.5	red
ec:6.3.5.2	blue
ec:6.3.5.4	red
ec:6.3.5.5	blue
ec:6.3.5.7	blue
ec:6.4.1.1	red
ec:6.4.1.2	red
