# Supplementary material for: The transcriptional landscape of Rhizoctonia solani AG1-IA during infection of soybean as defined by RNA-seq
Source: PLoS One. 2017 Sep 6;12(9):e0184095. doi: 10.1371/journal.pone.0184095 (PMC5587340; doi:10.1371/journal.pone.0184095)
Supplement: S6 Table — (XLSX) [file pone.0184095.s006.xlsx]

## Sheet: 24 h.p.o.
S6 Table. Differentially expressed genes during Rhizoctonia-soybean interactions 24 hours post-onset of necrosis
[1] Transcript ID as annotated from the European nucleotide archive
[2] Putative annotations based on Blastx alignments using Blast2GO software
[3] Mean counts of genes during Rhizoctonia-soybean interactions
[4] Mean counts of genes from control samples
[5] Fold change of interaction gene expression divided by control sample. Higher numbers indicate an increase in the gene expression during interaction
[6] Log(2) fold change value
[7] P. value as calculated by DESeq
[8] FDR adjusted P. values with a 0.01 FDR adjustment
Transcript ID [1]	Putative Annotation [2]	Interaction Mean [3]	Control Mean [4]	Fold Change [5]	Log(2) Fold Change [6]	P. value [7]	Adjusted P. value [8]
>ENA|ELU43134|ELU43134.1	cytoplasmic protein	1807.05	6528.76	0.276783	-1.85317	2.31e-50	2.11e-49
>ENA|ELU42340|ELU42340.1	2-oxoglutarate dehydrogenase E1 component	6966.01	1134.19	6.14185	2.61867	5.64e-91	1.15e-89
>ENA|ELU45114|ELU45114.1	adenylosuccinate lyase	1593.81	218.715	7.28713	2.86535	1.93e-84	3.44e-83
>ENA|ELU41744|ELU41744.1	alpha/beta hydrolase family domain-containing protein	92.1811	692.61	0.133092	-2.9095	2.83e-24	1.21e-23
>ENA|ELU45402|ELU45402.1	aminotransferase	7213.8	1566.39	4.60538	2.20332	4.28e-17	1.38e-16
>ENA|ELU44781|ELU44781.1	argininosuccinate lyase	1647	415.927	3.95982	1.98543	1.34e-47	1.14e-46
>ENA|ELU43066|ELU43066.1	ATG16 domain-containing protein	254.429	890.813	0.285615	-1.80786	1.02e-36	6.41e-36
>ENA|ELU41279|ELU41279.1	cAMP-independent regulatory protein	5549.38	1530.24	3.62648	1.85857	9.38e-50	8.37e-49
>ENA|ELU41469|ELU41469.1	chromatin remodeling complex subunit	407.637	1407.89	0.289537	-1.78818	9.66e-40	6.64e-39
>ENA|ELU44761|ELU44761.1	dihydrodipicolinate synthetase	2702.82	735.346	3.67558	1.87797	1.92e-32	1.07e-31
>ENA|ELU38648|ELU38648.1	DNA-binding protein SMUBP-2	485.236	112.707	4.30527	2.1061	7.8e-34	4.51e-33
>ENA|ELU45034|ELU45034.1	domain-containing protein	799.261	162.642	4.91424	2.29697	3.78e-46	3.13e-45
>ENA|ELU38030|ELU38030.1	DUF89 domain-containing protein	11772.5	635.937	18.512	4.21039	1.78e-40	1.25e-39
>ENA|ELU35735|ELU35735.1	eIF3g domain-containing protein	962.924	266.094	3.61874	1.85549	8.93e-37	5.63e-36
>ENA|ELU40864|ELU40864.1	endoribonuclease l-PSP domain-containing protein	788.024	57.6878	13.6601	3.7719	4.65e-92	9.67e-91
>ENA|ELU37988|ELU37988.1	F-box-like domain-containing protein	60.52	351.717	0.17207	-2.53893	8.5e-45	6.69e-44
>ENA|ELU38745|ELU38745.1	fatty acid activator Faa4	6425.43	102344	0.0627829	-3.99349	2.27e-117	7.1e-116
>ENA|ELU41640|ELU41640.1	FHA domain-containing protein	358.05	1287.01	0.278202	-1.84579	8.34e-42	6.11e-41
>ENA|ELU43061|ELU43061.1	flavin-containing monooxygenase/FMO family protein	380.045	110.451	3.44086	1.78277	6.62e-25	2.87e-24
>ENA|ELU39608|ELU39608.1	fungal specific transcription factor domain-containing protein	3420.4	300.221	11.393	3.51007	1.22e-140	5.28e-139
>ENA|ELU41918|ELU41918.1	glucosamine--fructose-6-phosphate aminotransferase	16165.7	4997.04	3.23505	1.69379	2.33e-28	1.14e-27
>ENA|ELU42220|ELU42220.1	glycosyl hydrolase family 10 protein	392.448	1337.29	0.293466	-1.76874	5.04e-22	1.98e-21
>ENA|ELU44240|ELU44240.1	Histone domain-containing protein	1004.75	4202.39	0.239091	-2.06437	1.4e-17	4.64e-17
>ENA|ELU38224|ELU38224.1	HMG (high mobility group) box domain-containing protein	1186.07	17919.5	0.066189	-3.91726	1.95e-191	1.32e-189
>ENA|ELU45448|ELU45448.1	hypothetical protein	2337.7	7353.84	0.317889	-1.6534	7.74e-41	5.5e-40
>ENA|ELU44828|ELU44828.1	hypoxia induced protein conserved region domain-containing protein	6349.48	1052.57	6.03238	2.59273	2.35e-90	4.75e-89
>ENA|ELU39957|ELU39957.1	MFS_1 domain-containing protein	478.542	82.2627	5.81724	2.54033	8.43e-14	2.34e-13
>ENA|ELU43180|ELU43180.1	microtubule motor	142.738	620.421	0.230067	-2.11987	5.19e-43	3.92e-42
>ENA|ELU38782|ELU38782.1	Myb-like DNA-binding domain-containing protein	5224.01	1200.03	4.35322	2.12208	4.15e-63	4.95e-62
>ENA|ELU41738|ELU41738.1	NADH-cytochrome b5 reductase	3892.45	34665.3	0.112286	-3.15474	1.92e-135	7.96e-134
>ENA|ELU41787|ELU41787.1	PARP-1-like protein	466.632	1972.29	0.236594	-2.07952	2.34e-55	2.37e-54
>ENA|ELU40922|ELU40922.1	peptidase family s41 domain-containing protein	723.194	204.435	3.53752	1.82274	2.97e-32	1.64e-31
>ENA|ELU43361|ELU43361.1	Phosphatidylserine decarboxylase proenzyme	278.188	7709.69	0.0360829	-4.79254	3.21e-218	2.85e-216
>ENA|ELU45436|ELU45436.1	ran/spi1 binding protein	13081.1	2031.97	6.43763	2.68653	1.71e-49	1.51e-48
>ENA|ELU45359|ELU45359.1	ribosomal l29e domain-containing protein	2090.25	364.622	5.73266	2.5192	2.86e-08	5.9e-08
>ENA|ELU44255|ELU44255.1	ribosomal l35Ae domain-containing protein	7345.6	1061.36	6.92094	2.79097	2.71e-103	6.93e-102
>ENA|ELU44271|ELU44271.1	ribosomal l37ae domain-containing protein	5366.34	797.43	6.72954	2.75051	2.83e-97	6.65e-96
>ENA|ELU38627|ELU38627.1	ribosomal s17 domain-containing protein	5050.61	810.939	6.22809	2.63879	1.16e-90	2.37e-89
>ENA|ELU45386|ELU45386.1	RTA1-like protein	2302.09	477.04	4.82578	2.27076	1.4e-62	1.65e-61
>ENA|ELU41286|ELU41286.1	short chain dehydrogenase domain-containing protein	471.815	34.4393	13.6999	3.77609	2.84e-67	3.66e-66
>ENA|ELU37150|ELU37150.1	T-complex protein 1	4048.49	447.698	9.0429	3.17679	6.7e-121	2.16e-119
>ENA|ELU38756|ELU38756.1	T-complex protein 1 subunit eta	4524.23	804.874	5.62104	2.49084	2.31e-81	3.9e-80
>ENA|ELU44786|ELU44786.1	translation initiation factor eif-2b	1684.97	532.65	3.16336	1.66146	1.08e-34	6.4e-34
>ENA|ELU38009|ELU38009.1	translation initiation factor eIF2 gamma subunit	4374.55	1380.17	3.16957	1.66429	4.07e-40	2.82e-39
>ENA|ELU45001|ELU45001.1	UDP-glucose hexose-1-phosphate uridylyltransferase	801.784	266.366	3.01009	1.5898	3.62e-27	1.7e-26
>ENA|ELU41916|ELU41916.1	---NA---	949.24	41.3697	22.9453	4.52013	3.51e-93	7.5e-92
>ENA|ELU42251|ELU42251.1	---NA---	627.646	46.4886	13.5011	3.755	2.3e-78	3.71e-77
>ENA|ELU37247|ELU37247.1	---NA---	893.057	48.8626	18.2769	4.19195	3.66e-34	2.13e-33
>ENA|ELU39777|ELU39777.1	---NA---	4542.99	68.2259	66.5875	6.05718	0.00342305	0.00482569
>ENA|ELU42219|ELU42219.1	---NA---	252.925	69.1508	3.65758	1.87089	1.16e-22	4.67e-22
>ENA|ELU37982|ELU37982.1	---NA---	346.237	70.6477	4.90089	2.29304	2.28e-31	1.23e-30
>ENA|ELU40943|ELU40943.1	---NA---	411.642	71.7911	5.73388	2.51951	7.45e-39	4.99e-38
>ENA|ELU36802|ELU36802.1	---NA---	2818.93	83.5238	33.75	5.07682	1.44e-209	1.19e-207
>ENA|ELU38734|ELU38734.1	---NA---	673.845	83.9022	8.03131	3.00564	4.08e-64	4.97e-63
>ENA|ELU40564|ELU40564.1	---NA---	494.949	85.8818	5.76315	2.52686	8.99e-42	6.57e-41
>ENA|ELU37921|ELU37921.1	---NA---	736.358	94.2552	7.81239	2.96576	2.94e-63	3.53e-62
>ENA|ELU44737|ELU44737.1	---NA---	295.012	97.5805	3.02327	1.59611	2.03e-17	6.67e-17
>ENA|ELU41756|ELU41756.1	---NA---	392.158	110.04	3.56378	1.83341	1.54e-08	3.21e-08
>ENA|ELU41767|ELU41767.1	---NA---	456.731	110.091	4.14867	2.05265	6.07e-26	2.71e-25
>ENA|ELU38002|ELU38002.1	---NA---	444.698	111.133	4.00149	2.00054	3.27e-31	1.76e-30
>ENA|ELU44738|ELU44738.1	---NA---	616.642	150.886	4.08682	2.03098	1.37e-34	8.11e-34
>ENA|ELU44416|ELU44416.1	---NA---	1007.3	191.38	5.26334	2.39598	1.11e-53	1.09e-52
>ENA|ELU38209|ELU38209.1	---NA---	653.258	213.057	3.06612	1.61641	2.58e-26	1.17e-25
>ENA|ELU37992|ELU37992.1	---NA---	663.711	214.392	3.09578	1.6303	1.46e-05	2.53e-05
>ENA|ELU44990|ELU44990.1	---NA---	1057.63	288.608	3.66459	1.87365	4.26e-37	2.71e-36
>ENA|ELU41928|ELU41928.1	---NA---	4978.43	369.808	13.4622	3.75084	1.22e-23	5.08e-23
>ENA|ELU40572|ELU40572.1	---NA---	118.592	374.221	0.316905	-1.65788	7.53e-26	3.35e-25
>ENA|ELU44214|ELU44214.1	---NA---	128.828	391.391	0.329153	-1.60317	8.41e-22	3.26e-21
>ENA|ELU38563|ELU38563.1	---NA---	1561.8	409.476	3.81414	1.93136	1.22e-45	9.92e-45
>ENA|ELU44209|ELU44209.1	---NA---	116.274	431.011	0.269771	-1.89019	8.27e-30	4.24e-29
>ENA|ELU38421|ELU38421.1	---NA---	113.151	432.33	0.261724	-1.93388	2.79e-13	7.57e-13
>ENA|ELU37152|ELU37152.1	---NA---	1.93599	443.913	0.0043612	-7.84106	3.65e-180	2.27e-178
>ENA|ELU44992|ELU44992.1	---NA---	145.197	448.54	0.323711	-1.62722	3.98e-09	8.58e-09
>ENA|ELU43115|ELU43115.1	---NA---	2282.07	503.327	4.53397	2.18077	8.48e-62	9.85e-61
>ENA|ELU42422|ELU42422.1	---NA---	1671.81	511.506	3.26841	1.70859	1.73e-35	1.05e-34
>ENA|ELU40958|ELU40958.1	---NA---	165.398	548.407	0.301597	-1.72931	1.7e-16	5.36e-16
>ENA|ELU41780|ELU41780.1	---NA---	2401.11	565.821	4.24358	2.08528	3.62e-10	8.26e-10
>ENA|ELU41754|ELU41754.1	---NA---	155.754	593.678	0.262355	-1.93041	7.07e-18	2.37e-17
>ENA|ELU44446|ELU44446.1	---NA---	210.472	683.231	0.308054	-1.69874	2.95e-29	1.49e-28
>ENA|ELU38662|ELU38662.1	---NA---	75.033	694.58	0.108026	-3.21054	1.51e-81	2.56e-80
>ENA|ELU40782|ELU40782.1	---NA---	200.414	736.47	0.272127	-1.87765	2.02e-22	8.01e-22
>ENA|ELU39205|ELU39205.1	---NA---	2628.36	736.69	3.5678	1.83504	7.6e-45	6e-44
>ENA|ELU37314|ELU37314.1	---NA---	57.6984	748.346	0.0771012	-3.6971	1.04e-40	7.39e-40
>ENA|ELU39964|ELU39964.1	---NA---	218.113	776.169	0.281013	-1.83129	2.89e-26	1.31e-25
>ENA|ELU44780|ELU44780.1	---NA---	94.4472	806.789	0.117065	-3.09461	5.03e-72	7.16e-71
>ENA|ELU40906|ELU40906.1	---NA---	3932.16	812.47	4.83975	2.27493	1.03e-67	1.34e-66
>ENA|ELU35755|ELU35755.1	---NA---	187.507	877.475	0.213689	-2.22641	1.95e-20	7.2e-20
>ENA|ELU41927|ELU41927.1	---NA---	7945.52	913.196	8.70079	3.12115	1.34e-28	6.65e-28
>ENA|ELU37313|ELU37313.1	---NA---	93.7331	1007.98	0.0929909	-3.42677	4.72e-93	1e-91
>ENA|ELU38810|ELU38810.1	---NA---	316.161	1040.24	0.303931	-1.71819	8.3e-36	5.09e-35
>ENA|ELU40582|ELU40582.1	---NA---	285.657	1044.56	0.273471	-1.87054	1.67e-41	1.21e-40
>ENA|ELU41642|ELU41642.1	---NA---	20.9223	1057.97	0.0197758	-5.66012	4.19e-201	3.11e-199
>ENA|ELU40783|ELU40783.1	---NA---	257.358	1066.72	0.24126	-2.05134	1.66e-23	6.85e-23
>ENA|ELU45269|ELU45269.1	---NA---	5956.81	1121.1	5.31338	2.40963	2.45e-71	3.44e-70
>ENA|ELU45880|ELU45880.1	---NA---	263.524	1150.02	0.229147	-2.12566	5.12e-14	1.44e-13
>ENA|ELU41919|ELU41919.1	---NA---	67.7806	1154.84	0.0586924	-4.09068	2.14e-146	9.77e-145
>ENA|ELU42959|ELU42959.1	---NA---	5189.14	1175.01	4.41627	2.14283	5.08e-63	6.06e-62
>ENA|ELU37996|ELU37996.1	---NA---	214.8	1218.64	0.176262	-2.50421	2.61e-15	7.83e-15
>ENA|ELU44212|ELU44212.1	---NA---	364.861	1292.92	0.282199	-1.82522	2.87e-17	9.35e-17
>ENA|ELU44213|ELU44213.1	---NA---	430.378	1310.22	0.328478	-1.60613	1.01e-14	2.95e-14
>ENA|ELU38672|ELU38672.1	---NA---	342.55	1445.36	0.236999	-2.07705	3.05e-51	2.87e-50
>ENA|ELU38422|ELU38422.1	---NA---	56.8083	1522.22	0.0373193	-4.74393	3.63e-204	2.82e-202
>ENA|ELU35723|ELU35723.1	---NA---	8618.83	1543.46	5.58408	2.48132	2.21e-85	3.99e-84
>ENA|ELU41925|ELU41925.1	---NA---	467.645	1622.33	0.288255	-1.79458	3.12e-17	1.01e-16
>ENA|ELU41641|ELU41641.1	---NA---	339.423	1881.79	0.180372	-2.47095	7.43e-74	1.12e-72
>ENA|ELU37323|ELU37323.1	---NA---	113.184	2035.75	0.0555981	-4.16882	5.28e-175	2.99e-173
>ENA|ELU37431|ELU37431.1	---NA---	117.999	2169.6	0.0543876	-4.20058	1.47e-93	3.17e-92
>ENA|ELU39752|ELU39752.1	---NA---	681.733	2379.3	0.286527	-1.80325	4.89e-39	3.29e-38
>ENA|ELU36997|ELU36997.1	---NA---	807.783	2466.68	0.327479	-1.61053	5.43e-36	3.34e-35
>ENA|ELU37780|ELU37780.1	---NA---	223.258	2527.19	0.0883423	-3.50075	3.45e-125	1.21e-123
>ENA|ELU41926|ELU41926.1	---NA---	20589.9	2551.54	8.0696	3.0125	3.21e-94	7.04e-93
>ENA|ELU41740|ELU41740.1	---NA---	674.923	2575.23	0.262083	-1.93191	1.65e-50	1.52e-49
>ENA|ELU38643|ELU38643.1	---NA---	739.82	2649.57	0.279223	-1.84051	7.2e-30	3.69e-29
>ENA|ELU38019|ELU38019.1	---NA---	149.917	2870.06	0.0522349	-4.25884	2.98e-76	4.62e-75
>ENA|ELU38644|ELU38644.1	---NA---	1003.13	3261.4	0.307578	-1.70098	1.37e-21	5.26e-21
>ENA|ELU37311|ELU37311.1	---NA---	128.499	3347.67	0.0383846	-4.70333	6.09e-223	5.73e-221
>ENA|ELU43142|ELU43142.1	---NA---	12968.1	3433.04	3.77746	1.91742	2.22e-35	1.34e-34
>ENA|ELU37948|ELU37948.1	---NA---	36.954	3741.07	0.00987793	-6.66158	0	0
>ENA|ELU37786|ELU37786.1	---NA---	1072.31	3856.37	0.278061	-1.84652	3.91e-48	3.39e-47
>ENA|ELU41290|ELU41290.1	---NA---	172.872	4396.65	0.039319	-4.66863	2.23e-224	2.12e-222
>ENA|ELU37905|ELU37905.1	---NA---	910.612	4662.36	0.195311	-2.35615	3.83e-73	5.6e-72
>ENA|ELU44415|ELU44415.1	---NA---	1233.85	4679.71	0.263661	-1.92325	1.39e-52	1.34e-51
>ENA|ELU37322|ELU37322.1	---NA---	263.012	5080.24	0.0517715	-4.2717	4.42e-205	3.48e-203
>ENA|ELU38554|ELU38554.1	---NA---	337.092	5658.94	0.0595681	-4.06932	2.11e-112	6.34e-111
>ENA|ELU39359|ELU39359.1	---NA---	28385	6117.77	4.63977	2.21405	3.11e-44	2.41e-43
>ENA|ELU38606|ELU38606.1	---NA---	276.222	6554.61	0.0421417	-4.56861	6.23e-231	6.54e-229
>ENA|ELU44735|ELU44735.1	---NA---	1453.4	6897.74	0.210707	-2.24669	3.36e-10	7.69e-10
>ENA|ELU38470|ELU38470.1	---NA---	653.046	7288.16	0.0896037	-3.4803	2.6e-153	1.28e-151
>ENA|ELU44525|ELU44525.1	---NA---	896.296	9677.95	0.0926122	-3.43265	1.01e-151	4.84e-150
>ENA|ELU37804|ELU37804.1	---NA---	73.1236	10545.8	0.0069339	-7.17212	3.65e-191	2.45e-189
>ENA|ELU36475|ELU36475.1	---NA---	11.7084	11972.7	0.000977932	-9.99798	2.55e-246	3.28e-244
>ENA|ELU39521|ELU39521.1	---NA---	215.699	12256.9	0.0175982	-5.82843	4.93e-30	2.55e-29
>ENA|ELU36474|ELU36474.1	---NA---	11.0737	12878.2	0.000859879	-10.1836	0	0
>ENA|ELU45008|ELU45008.1	---NA---	4305.74	16353.7	0.263289	-1.92528	2.33e-55	2.36e-54
>ENA|ELU44531|ELU44531.1	---NA---	179.08	19121.6	0.00936533	-6.73846	0	0
>ENA|ELU37246|ELU37246.1	---NA---	1491.06	19611.5	0.0760298	-3.71729	2.25e-177	1.31e-175
>ENA|ELU38833|ELU38833.1	---NA---	439.912	24515	0.0179446	-5.8003	4.94e-125	1.71e-123
>ENA|ELU43292|ELU43292.1	---NA---	7004.15	26018.2	0.269202	-1.89324	7.56e-54	7.45e-53
>ENA|ELU38432|ELU38432.1	---NA---	8092.07	46491.4	0.174055	-2.52238	1.41e-91	2.89e-90
>ENA|ELU45286|ELU45286.1	14-3-3 protein	53140.9	12927.3	4.11075	2.0394	1.27e-63	1.54e-62
>ENA|ELU41353|ELU41353.1	2 domain-containing	629.663	2691.43	0.233951	-2.09572	1.75e-58	1.88e-57
>ENA|ELU41566|ELU41566.1	2-deoxy-D-gluconate 3-dehydrogenase	1053.21	274.307	3.83954	1.94094	2.85e-24	1.21e-23
>ENA|ELU42109|ELU42109.1	2-ketogluconate transporter	2448.8	12458.7	0.196554	-2.347	5.35e-37	3.39e-36
>ENA|ELU39529|ELU39529.1	2-nitropropane dioxygenase	1179.27	384.4	3.0678	1.61721	6.09e-31	3.25e-30
>ENA|ELU44552|ELU44552.1	2-nitropropane dioxygenase	3116.07	980.424	3.17828	1.66825	1.58e-38	1.05e-37
>ENA|ELU41154|ELU41154.1	20S proteasome subunit	2209.25	334.72	6.6003	2.72253	1.63e-77	2.59e-76
>ENA|ELU37759|ELU37759.1	20S proteasome subunit	1296.04	341.103	3.79957	1.92584	1.95e-17	6.4e-17
>ENA|ELU41460|ELU41460.1	20S proteasome subunit	2732.74	462.569	5.90775	2.56261	2.06e-37	1.33e-36
>ENA|ELU41836|ELU41836.1	20S proteasome subunit	2602.13	543.77	4.78535	2.25863	1.47e-63	1.78e-62
>ENA|ELU45790|ELU45790.1	20S proteasome subunit	3333.33	654.502	5.09292	2.34849	4.94e-71	6.88e-70
>ENA|ELU38264|ELU38264.1	26S protease regulatory subunit 6A	3423.18	953.716	3.5893	1.8437	9.23e-47	7.78e-46
>ENA|ELU40554|ELU40554.1	26S proteasome non-ATPase regulatory subunit 12	3513.19	657.603	5.34241	2.41749	3.92e-75	6e-74
>ENA|ELU39987|ELU39987.1	26S proteasome regulatory complex	4179.56	930.262	4.49288	2.16764	2.46e-38	1.62e-37
>ENA|ELU44340|ELU44340.1	26S proteasome regulatory subunit rpn-1	4961.33	924.588	5.36599	2.42384	2.15e-56	2.22e-55
>ENA|ELU36572|ELU36572.1	26S proteasome subunit RPN2a	4596.7	1147.28	4.00659	2.00237	7.1e-56	7.27e-55
>ENA|ELU39813|ELU39813.1	2OG-Fe(II) oxygenase superfamily domain-containing	63.7745	297.071	0.214678	-2.21975	3.93e-34	2.28e-33
>ENA|ELU37523|ELU37523.1	3-deoxy-7-phosphoheptulonate synthase	3365.7	72924.4	0.0461532	-4.43743	3.78e-241	4.58e-239
>ENA|ELU38344|ELU38344.1	3-hydroxyacyl- -dehydrogenase	6003.68	1232.81	4.86993	2.2839	5.72e-57	5.97e-56
>ENA|ELU45333|ELU45333.1	3-isopropylmalate dehydrogenase	1621.41	249.502	6.49856	2.70012	1.22e-77	1.95e-76
>ENA|ELU43151|ELU43151.1	3-ketoacyl- -thiolase	5950.26	1892.03	3.14491	1.65302	7.09e-41	5.04e-40
>ENA|ELU39326|ELU39326.1	40s ribosomal	7441.35	1475.73	5.04249	2.33414	3.41e-71	4.77e-70
>ENA|ELU38217|ELU38217.1	40S ribosomal protein S2	12307.3	1455.7	8.45456	3.07973	4.19e-74	6.33e-73
>ENA|ELU42635|ELU42635.1	40S ribosomal protein S23	8100.14	1438.65	5.63038	2.49323	7.8e-86	1.43e-84
>ENA|ELU37810|ELU37810.1	40s ribosomal protein s4	13389.6	1815.54	7.375	2.88264	2.52e-113	7.66e-112
>ENA|ELU38429|ELU38429.1	40S ribosomal protein S8	11243.4	1224.32	9.18339	3.19903	3.65e-67	4.69e-66
>ENA|ELU42685|ELU42685.1	40S ribosomal S0	10329.3	1327.1	7.78333	2.96039	2.22e-117	6.99e-116
>ENA|ELU43112|ELU43112.1	40S ribosomal S11	7726.64	1179.02	6.55344	2.71225	6.79e-99	1.62e-97
>ENA|ELU45696|ELU45696.1	40S ribosomal S12	6065.2	1099.31	5.51728	2.46396	5.26e-29	2.64e-28
>ENA|ELU41657|ELU41657.1	40S ribosomal S13	5279.39	1013.82	5.20743	2.38057	1.41e-68	1.87e-67
>ENA|ELU36804|ELU36804.1	40S ribosomal S14	9569	2311.24	4.1402	2.0497	4.14e-61	4.73e-60
>ENA|ELU43518|ELU43518.1	40S ribosomal S15	6781.37	1341.62	5.0546	2.3376	1.67e-47	1.43e-46
>ENA|ELU38287|ELU38287.1	40S ribosomal S3	8280.22	1134.94	7.29571	2.86705	3.22e-23	1.32e-22
>ENA|ELU41656|ELU41656.1	40S ribosomal S6	9392.06	1259.22	7.45865	2.89891	3.49e-112	1.04e-110
>ENA|ELU44126|ELU44126.1	40S ribosomal S9	5714.88	825.825	6.9202	2.79081	5.59e-17	1.8e-16
>ENA|ELU37770|ELU37770.1	5-methyltetrahydropteroyltriglutamate--homocysteine S-	21813.2	2445.11	8.92115	3.15723	3.14e-61	3.6e-60
>ENA|ELU39453|ELU39453.1	6-phosphogluconate dehydrogenase NAD binding domain-containing	2051.16	675.424	3.03685	1.60257	2.27e-14	6.51e-14
>ENA|ELU42356|ELU42356.1	60s acidic ribosomal domain-containing	4741.92	771.328	6.14774	2.62006	2.71e-76	4.2e-75
>ENA|ELU43517|ELU43517.1	60s acidic ribosomal domain-containing	5848.54	790.253	7.40084	2.88769	2.67e-107	7.24e-106
>ENA|ELU37028|ELU37028.1	60S acidic ribosomal P0	11652.1	1497.22	7.78251	2.96024	1.74e-52	1.67e-51
>ENA|ELU45327|ELU45327.1	60S ribosomal L10A	22504.8	4813.51	4.67534	2.22507	1.46e-73	2.19e-72
>ENA|ELU41911|ELU41911.1	60S ribosomal L15	9502.28	1272.64	7.46659	2.90045	4.92e-112	1.46e-110
>ENA|ELU42271|ELU42271.1	60S ribosomal L17 L23	7634.87	1144.4	6.67149	2.73801	3.09e-100	7.58e-99
>ENA|ELU45907|ELU45907.1	60S ribosomal L18-B	14439	2979.35	4.84636	2.2769	2.78e-53	2.71e-52
>ENA|ELU37344|ELU37344.1	60S ribosomal L2	13782.7	2033.74	6.77705	2.76066	3.97e-53	3.85e-52
>ENA|ELU42483|ELU42483.1	60S ribosomal L27	8755.01	1068.47	8.19397	3.03456	6.3e-121	2.05e-119
>ENA|ELU41508|ELU41508.1	60S ribosomal L27a	9334.19	1499.16	6.2263	2.63837	6.84e-96	1.55e-94
>ENA|ELU41693|ELU41693.1	60S ribosomal L3	12525.8	1455.51	8.60578	3.10531	1.33e-54	1.33e-53
>ENA|ELU42922|ELU42922.1	60S ribosomal L31	4539.02	693.309	6.54689	2.71081	6.05e-29	3.03e-28
>ENA|ELU36170|ELU36170.1	60S ribosomal L5	2710.81	483.979	5.6011	2.48571	2.77e-06	5.01e-06
>ENA|ELU37728|ELU37728.1	60S ribosomal L6	6866.52	993.145	6.91392	2.7895	1.26e-09	2.8e-09
>ENA|ELU44756|ELU44756.1	60S ribosomal L7	17601	5664.98	3.10699	1.63552	1.27e-41	9.29e-41
>ENA|ELU44301|ELU44301.1	60S ribosomal protein L13a	12803.1	1930.14	6.63323	2.72971	3.07e-53	2.98e-52
>ENA|ELU45362|ELU45362.1	60S ribosomal protein L5	507.206	55.1648	9.19438	3.20075	1.56e-57	1.65e-56
>ENA|ELU45468|ELU45468.1	60S ribosomal protein L9	7159.75	976.493	7.3321	2.87423	6.29e-44	4.84e-43
>ENA|ELU42110|ELU42110.1	AAA domain-containing	1994.15	662.305	3.01093	1.59021	9.24e-34	5.33e-33
>ENA|ELU45507|ELU45507.1	AAA domain-containing	239.053	1477.46	0.161799	-2.62772	8.57e-80	1.4e-78
>ENA|ELU43748|ELU43748.1	ABC transporter	1523.9	146.443	10.4061	3.37936	3.82e-51	3.58e-50
>ENA|ELU43745|ELU43745.1	ABC transporter	2518.6	406.5	6.19582	2.6313	6.5e-83	1.13e-81
>ENA|ELU44174|ELU44174.1	ABC transporter CDR4	675.399	191.537	3.5262	1.81811	1.29e-30	6.8e-30
>ENA|ELU45644|ELU45644.1	ABC transporter domain-containing	338.867	1033.18	0.327986	-1.6083	7.28e-31	3.87e-30
>ENA|ELU45761|ELU45761.1	acetolactate synthase	5104.1	1081.4	4.71988	2.23875	4.63e-51	4.32e-50
>ENA|ELU45112|ELU45112.1	acetolactate synthase	1912.31	519.445	3.68146	1.88028	7.84e-44	6.03e-43
>ENA|ELU44100|ELU44100.1	acetyl- acetyl transferase	4193.87	1191.07	3.52108	1.81602	1.76e-46	1.48e-45
>ENA|ELU43694|ELU43694.1	acetyl-CoA carboxylase	5837.97	650.359	8.97653	3.16616	8.72e-126	3.1e-124
>ENA|ELU42924|ELU42924.1	acetyl-coenzyme A synthetase	12869.6	3417.53	3.76578	1.91295	3.53e-36	2.18e-35
>ENA|ELU42673|ELU42673.1	acetylornithine aminotransferase	2533.53	471.676	5.37135	2.42528	1.32e-72	1.92e-71
>ENA|ELU45379|ELU45379.1	aconitase	2653.36	326.039	8.13815	3.0247	2.5e-39	1.69e-38
>ENA|ELU45358|ELU45358.1	aconitase	4170.91	383.781	10.8679	3.44201	2.06e-32	1.15e-31
>ENA|ELU43233|ELU43233.1	aconitate hydratase	647.584	93.4911	6.9267	2.79217	7.78e-58	8.28e-57
>ENA|ELU37363|ELU37363.1	actin	52819.3	16042.7	3.29241	1.71914	3.42e-46	2.85e-45
>ENA|ELU41456|ELU41456.1	actin-associated protein	4331.16	14806.4	0.292518	-1.7734	1.53e-47	1.3e-46
>ENA|ELU40857|ELU40857.1	actin-related protein	1341.56	378.975	3.53998	1.82374	1.32e-38	8.81e-38
>ENA|ELU37332|ELU37332.1	acyl- dehydrogenase	4806.47	1581.54	3.0391	1.60364	2.59e-33	1.48e-32
>ENA|ELU42027|ELU42027.1	acyltransferase family domain-containing	582.304	47.798	12.1826	3.60675	1.76e-89	3.5e-88
>ENA|ELU43140|ELU43140.1	adenine phosphoribosyltransferase	899.816	132.421	6.79511	2.7645	7.13e-64	8.65e-63
>ENA|ELU39556|ELU39556.1	adenosine kinase	3908.22	848.709	4.6049	2.20317	6.75e-65	8.37e-64
>ENA|ELU45153|ELU45153.1	adenosylhomocysteinase	16389.9	1406.01	11.657	3.54313	1.43e-69	1.94e-68
>ENA|ELU39316|ELU39316.1	adenosylmethionine decarboxylase	687.247	157.796	4.35527	2.12276	1.63e-28	8.02e-28
>ENA|ELU40904|ELU40904.1	adenylylsulfate kinase	1696.03	211.041	8.0365	3.00657	2.9e-86	5.45e-85
>ENA|ELU44805|ELU44805.1	adoMet dependent proline di-methyltransferase domain-containing	333.041	50.6025	6.5815	2.71842	1.93e-27	9.14e-27
>ENA|ELU42956|ELU42956.1	AGC NDR kinase	1969.91	563.653	3.4949	1.80525	8.61e-41	6.11e-40
>ENA|ELU43368|ELU43368.1	AGC/NDR protein kinase	1360.32	363.727	3.73996	1.90302	3.11e-42	2.3e-41
>ENA|ELU40905|ELU40905.1	AIG1 domain-containing protein	787.997	142.862	5.51579	2.46357	3.82e-26	1.72e-25
>ENA|ELU43846|ELU43846.1	AlcB domain-containing protein	461.199	69.8938	6.59857	2.72215	4.57e-23	1.86e-22
>ENA|ELU42457|ELU42457.1	alcohol dehydrogenase	549.928	102.328	5.37416	2.42604	4.36e-44	3.37e-43
>ENA|ELU42783|ELU42783.1	alcohol dehydrogenase	60.5448	766.753	0.0789626	-3.66269	1.94e-107	5.29e-106
>ENA|ELU40279|ELU40279.1	alcohol dehydrogenase groES-like domain-containing	509.163	5683	0.0895941	-3.48045	1.05e-37	6.85e-37
>ENA|ELU42204|ELU42204.1	alcohol oxidase	436.486	2556.15	0.170759	-2.54997	4.31e-83	7.52e-82
>ENA|ELU36559|ELU36559.1	alcohol oxidase	1402.04	7237.56	0.193717	-2.36798	5.81e-78	9.34e-77
>ENA|ELU42420|ELU42420.1	alcohol oxidase-like protein	88.364	6573.79	0.0134419	-6.21712	0	0
>ENA|ELU36121|ELU36121.1	Aldedh domain-containing	16.1976	112.225	0.144332	-2.79254	1.31e-32	7.35e-32
>ENA|ELU38084|ELU38084.1	Aldedh domain-containing	192.978	616.872	0.312833	-1.67654	3.09e-29	1.56e-28
>ENA|ELU42205|ELU42205.1	aldehyde dehydrogenase	234.471	4426.55	0.0529692	-4.2387	6.39e-158	3.22e-156
>ENA|ELU42211|ELU42211.1	aldehyde dehydrogenase	1136.05	16989.4	0.0668682	-3.90253	4.47e-192	3.06e-190
>ENA|ELU40684|ELU40684.1	aldo keto reductase family domain-containing	1477.73	30.3203	48.7375	5.60696	1.59e-185	1.03e-183
>ENA|ELU45768|ELU45768.1	aldo keto reductase family domain-containing	463.088	67.3059	6.88035	2.78248	1.05e-45	8.6e-45
>ENA|ELU43910|ELU43910.1	aldo keto reductase family domain-containing	577.304	135.482	4.2611	2.09123	3.53e-24	1.5e-23
>ENA|ELU37748|ELU37748.1	aldo keto reductase family domain-containing	1126.92	202.363	5.5688	2.47737	3.26e-63	3.91e-62
>ENA|ELU43101|ELU43101.1	aldo keto reductase family domain-containing	181.539	680.23	0.266878	-1.90575	1.28e-39	8.74e-39
>ENA|ELU45475|ELU45475.1	aldo-keto reductase	734.776	80.3145	9.14873	3.19357	2.75e-56	2.83e-55
>ENA|ELU39300|ELU39300.1	alginate lyase domain-containing	149.208	483.128	0.308838	-1.69508	1.21e-27	5.79e-27
>ENA|ELU39942|ELU39942.1	alginate lyase domain-containing	103.052	706.076	0.14595	-2.77646	1.12e-67	1.45e-66
>ENA|ELU45251|ELU45251.1	alkaline phosphatase	1928.87	308.452	6.2534	2.64464	3.18e-81	5.32e-80
>ENA|ELU40799|ELU40799.1	alpha amylase	405.757	28.53	14.2221	3.83006	2.35e-25	1.03e-24
>ENA|ELU39169|ELU39169.1	alpha beta hydrolase family domain-containing	428.2	67.7957	6.31603	2.65902	1.7e-42	1.27e-41
>ENA|ELU43317|ELU43317.1	alpha beta hydrolase family domain-containing	411.811	122.368	3.36534	1.75075	5.17e-24	2.18e-23
>ENA|ELU45579|ELU45579.1	alpha beta hydrolase family domain-containing	282.431	919.415	0.307186	-1.70282	2.59e-33	1.48e-32
>ENA|ELU43683|ELU43683.1	alpha beta hydrolase family domain-containing	368.336	1948	0.189084	-2.4029	9.53e-55	9.58e-54
>ENA|ELU44130|ELU44130.1	alpha beta hydrolase family domain-containing	594.771	1951.51	0.304775	-1.71418	1.65e-39	1.12e-38
>ENA|ELU42665|ELU42665.1	alpha-amylase	2529.15	443.67	5.70052	2.51109	4.26e-59	4.65e-58
>ENA|ELU36425|ELU36425.1	alpha/beta hydrolase family domain-containing protein	170.274	1700.58	0.100127	-3.3201	4.54e-119	1.45e-117
>ENA|ELU44538|ELU44538.1	alphaherpesvirus glyco E domain-containing	757.481	2328.03	0.325374	-1.61983	2.13e-36	1.33e-35
>ENA|ELU40945|ELU40945.1	amidohydrolase	590.994	1848.76	0.319671	-1.64534	8.2e-37	5.18e-36
>ENA|ELU44206|ELU44206.1	amino acid transporter	6449.92	297.93	21.6491	4.43624	5.88e-143	2.61e-141
>ENA|ELU37971|ELU37971.1	aminopeptidase	893.461	213.86	4.17779	2.06274	1.4e-41	1.02e-40
>ENA|ELU45881|ELU45881.1	aminotransferase	1113.81	13939.8	0.0799009	-3.64565	8.85e-171	4.89e-169
>ENA|ELU39838|ELU39838.1	aminotransferase class I and II domain-containing	1425.54	280.577	5.08074	2.34504	2.13e-17	6.99e-17
>ENA|ELU38499|ELU38499.1	aminotransferase class IV domain-containing	628.923	164.163	3.83109	1.93776	4.66e-20	1.69e-19
>ENA|ELU41164|ELU41164.1	aminotransferase class-III domain-containing	682.955	162.163	4.21153	2.07434	2.57e-12	6.62e-12
>ENA|ELU44333|ELU44333.1	ammonium transporter	2128.79	7134.15	0.298394	-1.74471	5.16e-24	2.18e-23
>ENA|ELU39027|ELU39027.1	AMP dependent ligase	750.399	130.032	5.77086	2.52879	1.5e-52	1.44e-51
>ENA|ELU39155|ELU39155.1	AMP-binding domain-containing	272.392	49.1683	5.53999	2.46988	1.2e-17	4e-17
>ENA|ELU40785|ELU40785.1	Ank domain-containing protein	314.887	74.5682	4.22281	2.0782	1.77e-26	8.11e-26
>ENA|ELU38884|ELU38884.1	ankyrin repeats (3 copies) domain-containing	1662.9	9636.91	0.172556	-2.53486	3.72e-90	7.49e-89
>ENA|ELU36069|ELU36069.1	anthranilate phosphoribosyltransferase	264.634	2499.97	0.105855	-3.23984	1.46e-109	4.15e-108
>ENA|ELU40122|ELU40122.1	APC amino acid permease	307.677	1483.63	0.207381	-2.26965	2.45e-50	2.23e-49
>ENA|ELU44386|ELU44386.1	APH domain-containing	1297.55	333.594	3.88959	1.95962	1.04e-45	8.5e-45
>ENA|ELU41825|ELU41825.1	Apolipo domain-containing	8456.99	27055.3	0.312582	-1.67769	9.95e-44	7.64e-43
>ENA|ELU38290|ELU38290.1	arginine methyl transferase	324.899	61.8289	5.25481	2.39364	1.98e-32	1.1e-31
>ENA|ELU42755|ELU42755.1	arginine N-methyltransferase	3220.42	988.386	3.25826	1.7041	6.37e-41	4.55e-40
>ENA|ELU43540|ELU43540.1	argininosuccinate synthetase	5071.09	384.067	13.2037	3.72287	1.09e-134	4.41e-133
>ENA|ELU41579|ELU41579.1	arginyl-tRNA synthetase	3415.38	790.596	4.32	2.11103	1.38e-58	1.48e-57
>ENA|ELU41095|ELU41095.1	Arm domain-containing	30.7996	523.636	0.0588188	-4.08758	6.84e-57	7.11e-56
>ENA|ELU41083|ELU41083.1	arom polypeptide	105.693	2765.59	0.038217	-4.70964	1.35e-80	2.23e-79
>ENA|ELU41085|ELU41085.1	arom polypeptide	251.612	8561.61	0.0293884	-5.08861	6.15e-65	7.64e-64
>ENA|ELU41077|ELU41077.1	aromatic amino acid family biosynthesis-related	521.775	19453.8	0.0268212	-5.22048	4.09e-90	8.19e-89
>ENA|ELU37372|ELU37372.1	aromatic amino acid transaminase	1263.83	125.746	10.0506	3.32921	5.03e-98	1.2e-96
>ENA|ELU40706|ELU40706.1	aryl-alcohol dehydrogenase	583.446	3922.04	0.148761	-2.74893	8.76e-12	2.19e-11
>ENA|ELU41029|ELU41029.1	Arylesterase domain-containing	67.8457	698.893	0.097076	-3.36474	1.65e-78	2.68e-77
>ENA|ELU43911|ELU43911.1	asparagine synthase	1968.61	144.659	13.6086	3.76645	8.81e-60	9.82e-59
>ENA|ELU37630|ELU37630.1	aspartate carbamoyltransferase	1666.13	176.227	9.45441	3.24099	5.57e-29	2.79e-28
>ENA|ELU36727|ELU36727.1	aspartate kinase	733.32	203.78	3.59859	1.84743	2.22e-34	1.3e-33
>ENA|ELU41227|ELU41227.1	aspartate kinase homoserine dehydrogenase	1166.78	71.7801	16.2549	4.0228	1.9e-123	6.4e-122
>ENA|ELU37747|ELU37747.1	aspartate-tRNA ligase	2102.91	670	3.13867	1.65015	1.04e-27	4.98e-27
>ENA|ELU39638|ELU39638.1	aspartic protease	256.687	36.7507	6.98453	2.80416	1.13e-26	5.2e-26
>ENA|ELU37274|ELU37274.1	ATP citrate lyase isoform 2	2441.75	311.041	7.85025	2.97274	8.24e-54	8.11e-53
>ENA|ELU36798|ELU36798.1	ATP dependent DNA ligase domain-containing	133.751	545.297	0.245281	-2.02749	6.32e-38	4.14e-37
>ENA|ELU40376|ELU40376.1	ATP synthase g subunit domain-containing	2677.1	835.317	3.20489	1.68028	2.99e-38	1.97e-37
>ENA|ELU45331|ELU45331.1	ATP-binding cassette (ABC) transporter	5538.25	1112.82	4.97679	2.31521	4.94e-74	7.45e-73
>ENA|ELU43537|ELU43537.1	ATPase	4186.51	805.831	5.19527	2.3772	1.4e-71	1.97e-70
>ENA|ELU42355|ELU42355.1	autophagy 7	6144.91	1676.83	3.66459	1.87365	5.95e-30	3.06e-29
>ENA|ELU43054|ELU43054.1	B12D domain-containing	110.697	4900.67	0.0225881	-5.46829	1.37e-133	5.46e-132
>ENA|ELU45800|ELU45800.1	band 7 domain-containing	838.833	3127.92	0.268176	-1.89875	2.03e-50	1.86e-49
>ENA|ELU45028|ELU45028.1	Barwin domain-containing	7156.15	1627.86	4.39603	2.1362	5.36e-32	2.94e-31
>ENA|ELU42538|ELU42538.1	Bax1-I domain-containing	1072.08	3840.27	0.279168	-1.84079	3.97e-48	3.44e-47
>ENA|ELU42868|ELU42868.1	beta-glucosidase	1381.21	290.476	4.75499	2.24944	3.14e-54	3.12e-53
>ENA|ELU35525|ELU35525.1	beta-lactamase superfamily domain-containing	122.894	1301.85	0.0943992	-3.40508	1.74e-115	5.32e-114
>ENA|ELU42033|ELU42033.1	beta-mannosidase	422.009	127.55	3.30858	1.72621	1.56e-20	5.79e-20
>ENA|ELU37705|ELU37705.1	betaine lipid synthetase	2634.01	30.4367	86.5405	6.4353	3.19e-178	1.9e-176
>ENA|ELU44645|ELU44645.1	biotin synthase	3451.51	744.582	4.63549	2.21272	7.99e-65	9.88e-64
>ENA|ELU36599|ELU36599.1	Bna2p	1058.66	287.595	3.68109	1.88013	2.07e-38	1.37e-37
>ENA|ELU42760|ELU42760.1	BolA domain-containing protein	565.903	101.279	5.58758	2.48222	2.94e-48	2.56e-47
>ENA|ELU42705|ELU42705.1	BSC1-like ATPase	5449.1	19934.4	0.273352	-1.87117	1.15e-50	1.06e-49
>ENA|ELU44021|ELU44021.1	BTB domain-containing	428.14	110.577	3.87186	1.95303	8.4e-28	4.05e-27
>ENA|ELU36195|ELU36195.1	BTB domain-containing	27.7053	607.785	0.045584	-4.45533	1.73e-105	4.58e-104
>ENA|ELU39303|ELU39303.1	BTB domain-containing	157.094	1063.5	0.147713	-2.75913	2.1e-80	3.48e-79
>ENA|ELU42064|ELU42064.1	BTB domain-containing	489.616	1799.42	0.272097	-1.87781	5.86e-46	4.82e-45
>ENA|ELU40960|ELU40960.1	bZIP transcription factor domain-containing protein	1934.2	6020.22	0.321285	-1.63808	3.38e-10	7.72e-10
>ENA|ELU45707|ELU45707.1	C-1-tetrahydrofolate synthase	4702.43	1277.66	3.68051	1.87991	5.42e-28	2.63e-27
>ENA|ELU39413|ELU39413.1	C2 domain-containing	313.59	2404.92	0.130395	-2.93904	2.26e-80	3.73e-79
>ENA|ELU40612|ELU40612.1	C5-DNA-methyltransferase	510.237	2679.3	0.190437	-2.39262	2.5e-73	3.71e-72
>ENA|ELU42270|ELU42270.1	CAIB BAIF family enzyme	454.209	63.78	7.1215	2.83218	1.7e-51	1.6e-50
>ENA|ELU42801|ELU42801.1	calcium permease	1442.95	4697.17	0.307195	-1.70277	3.25e-42	2.4e-41
>ENA|ELU39621|ELU39621.1	calcium-transporting ATPase 1	1528.95	273.087	5.59875	2.48511	7.39e-67	9.44e-66
>ENA|ELU39666|ELU39666.1	calpain	1096.99	178.959	6.12985	2.61585	1.53e-29	7.8e-29
>ENA|ELU37953|ELU37953.1	calpain	659.577	12986.7	0.0507886	-4.29935	1.82e-220	1.68e-218
>ENA|ELU43922|ELU43922.1	CAMK CAMKL MARK kinase	325.66	1289.54	0.252541	-1.98541	6.36e-47	5.38e-46
>ENA|ELU38243|ELU38243.1	CAP domain-containing	106.074	1970.59	0.0538282	-4.21549	3.86e-167	2.04e-165
>ENA|ELU42614|ELU42614.1	carbamoyl-phosphate synthase	6583.9	1706.3	3.85858	1.94807	1.44e-54	1.44e-53
>ENA|ELU37016|ELU37016.1	carbohydrate-binding module family 13 protein	67.7113	281.102	0.240878	-2.05363	4.88e-31	2.61e-30
>ENA|ELU44250|ELU44250.1	carbohydrate-binding module family 13 protein	1031.76	218.745	4.71671	2.23778	2.59e-51	2.43e-50
>ENA|ELU44739|ELU44739.1	carbon-nitrogen hydrolase domain-containing protein	618.144	2429.19	0.254465	-1.97446	2.33e-52	2.23e-51
>ENA|ELU41400|ELU41400.1	carboxylic acid transporter	4370.45	758.591	5.76128	2.52639	3.15e-47	2.68e-46
>ENA|ELU44358|ELU44358.1	carboxymethylenebutenolidase	131.006	1468.33	0.0892215	-3.48647	4.84e-118	1.53e-116
>ENA|ELU39472|ELU39472.1	carboxypeptidase C	2915.81	11288.4	0.258301	-1.95287	2.49e-56	2.57e-55
>ENA|ELU37664|ELU37664.1	carnitine acetyl transferase	3966.95	1174.32	3.37809	1.75621	3.78e-34	2.19e-33
>ENA|ELU39907|ELU39907.1	carnitine acetyl transferase	7525.17	2316.9	3.24795	1.69953	5.17e-37	3.28e-36
>ENA|ELU42586|ELU42586.1	carnitine acyl carnitine carrier	4579.74	692.855	6.60995	2.72464	1.39e-34	8.24e-34
>ENA|ELU39294|ELU39294.1	carrier protein	853.041	199.732	4.27093	2.09455	2.41e-31	1.3e-30
>ENA|ELU37744|ELU37744.1	casein kinase subunit II beta	7222.2	1835.8	3.93409	1.97603	1.09e-51	1.03e-50
>ENA|ELU37193|ELU37193.1	catalase	90.9302	1551.48	0.0586086	-4.09274	2.02e-152	9.8e-151
>ENA|ELU36962|ELU36962.1	catalase	2662.93	60683.2	0.0438825	-4.51021	5.33e-247	6.99e-245
>ENA|ELU44888|ELU44888.1	CBS and PB1 domain-containing	2124.98	666.911	3.18631	1.67189	1.38e-29	7e-29
>ENA|ELU36472|ELU36472.1	cell division cycle protein 48	17899.8	5389.84	3.32103	1.73163	6.58e-41	4.69e-40
>ENA|ELU37644|ELU37644.1	cellobiohydrolase	359.97	1725.98	0.20856	-2.26146	6.01e-63	7.14e-62
>ENA|ELU38090|ELU38090.1	cellobiose dehydrogenase	1431.09	241.264	5.93164	2.56843	3.32e-67	4.28e-66
>ENA|ELU36436|ELU36436.1	Ceramidase domain-containing	168.865	614.462	0.274818	-1.86345	3.32e-35	2e-34
>ENA|ELU38800|ELU38800.1	CFEM domain-containing	4017.33	621.058	6.46853	2.69344	5.03e-92	1.04e-90
>ENA|ELU42098|ELU42098.1	CFEM domain-containing	1041.98	35326.7	0.0294955	-5.08336	4.59e-226	4.52e-224
>ENA|ELU42213|ELU42213.1	CHAT domain-containing	83.5354	361.517	0.231069	-2.1136	1.37e-33	7.88e-33
>ENA|ELU37125|ELU37125.1	CHD5 domain-containing	758.625	2752.7	0.275593	-1.85939	4.19e-47	3.56e-46
>ENA|ELU39204|ELU39204.1	chitin deacetylase	449.118	42.2684	10.6254	3.40944	2.75e-57	2.89e-56
>ENA|ELU37179|ELU37179.1	chitin deacetylase	326.422	2581.77	0.126433	-2.98355	4.79e-108	1.32e-106
>ENA|ELU43457|ELU43457.1	chitin deacetylase	3370.21	10433.5	0.323018	-1.63031	3.31e-40	2.31e-39
>ENA|ELU38592|ELU38592.1	chitin deacetylase	1456.03	39764.9	0.036616	-4.77138	2.28e-267	3.78e-265
>ENA|ELU40244|ELU40244.1	chitin synthase D	3833.69	24728.4	0.155032	-2.68936	6.38e-102	1.62e-100
>ENA|ELU43353|ELU43353.1	chitin synthase export chaperone	1621.88	10010.9	0.162011	-2.62584	8.65e-45	6.8e-44
>ENA|ELU43379|ELU43379.1	choline dehydrogenase	243.593	1963.74	0.124046	-3.01106	4.48e-89	8.89e-88
>ENA|ELU42234|ELU42234.1	choline transporter	946.77	135.388	6.99299	2.80591	8.06e-72	1.15e-70
>ENA|ELU38231|ELU38231.1	chorismate mutase	446.98	23836.7	0.0187517	-5.73683	0	0
>ENA|ELU41481|ELU41481.1	chorismate synthase	2348.95	49292.5	0.0476534	-4.39128	6.9e-236	7.49e-234
>ENA|ELU37439|ELU37439.1	citrate synthase	6424.87	1615.85	3.97615	1.99137	3.53e-13	9.51e-13
>ENA|ELU42562|ELU42562.1	COesterase domain-containing	261.755	86.1065	3.03989	1.60402	9.85e-17	3.14e-16
>ENA|ELU38655|ELU38655.1	COesterase domain-containing protein	220.942	1353.55	0.163232	-2.61501	7.24e-77	1.14e-75
>ENA|ELU40466|ELU40466.1	complex I intermediate-associated CIA30	246.758	755.953	0.326419	-1.6152	9.46e-29	4.71e-28
>ENA|ELU41606|ELU41606.1	COP9 signalosome	1844.75	318.904	5.78466	2.53223	3.79e-72	5.45e-71
>ENA|ELU41064|ELU41064.1	copper radical oxidase	112.989	786.007	0.143751	-2.79835	8.89e-72	1.26e-70
>ENA|ELU36633|ELU36633.1	copper radical oxidase	503.753	10149.3	0.0496341	-4.33252	5.71e-219	5.21e-217
>ENA|ELU43602|ELU43602.1	copper radical oxidase	376.941	21754.6	0.017327	-5.85084	0	0
>ENA|ELU40928|ELU40928.1	copper radical oxidase	1310.4	10603.4	0.123583	-3.01645	6.71e-122	2.22e-120
>ENA|ELU42795|ELU42795.1	copper zinc superoxide dismutase domain-containing	128.438	7848.02	0.0163657	-5.93318	1.03e-196	7.35e-195
>ENA|ELU42796|ELU42796.1	copper zinc superoxide dismutase domain-containing	2408.17	14083.9	0.170988	-2.54804	9.63e-92	1.99e-90
>ENA|ELU36610|ELU36610.1	CPS1 protein	4590.09	16887.1	0.271811	-1.87933	2.59e-53	2.53e-52
>ENA|ELU45814|ELU45814.1	cryptochrome-2	231.816	72.2314	3.20936	1.68228	3.79e-17	1.23e-16
>ENA|ELU45421|ELU45421.1	crystal protein	854.225	2589.89	0.32983	-1.6002	3.86e-36	2.38e-35
>ENA|ELU36882|ELU36882.1	CsbD domain-containing protein	8799.61	1812.03	4.8562	2.27983	4.76e-74	7.19e-73
>ENA|ELU42447|ELU42447.1	CTP synthase	1752.04	333.646	5.25121	2.39265	7.25e-46	5.96e-45
>ENA|ELU39598|ELU39598.1	Ctr domain-containing protein	473.011	1458.07	0.324409	-1.62412	6.83e-24	2.87e-23
>ENA|ELU41341|ELU41341.1	cupin domain-containing	162.656	559.313	0.290815	-1.78183	1.93e-19	6.82e-19
>ENA|ELU44532|ELU44532.1	Cut8 domain-containing	1420.67	6684.89	0.21252	-2.23433	1.25e-17	4.16e-17
>ENA|ELU42173|ELU42173.1	Cutinase domain-containing	830.284	276.583	3.00193	1.58589	1.62e-26	7.43e-26
>ENA|ELU41103|ELU41103.1	CVNH domain-containing	1309.14	436.063	3.00219	1.58601	9.39e-30	4.8e-29
>ENA|ELU39641|ELU39641.1	CVNH domain-containing	430.002	19659.5	0.0218724	-5.51474	3.15e-166	1.65e-164
>ENA|ELU40792|ELU40792.1	CVNH domain-containing protein	1544.76	470.261	3.28489	1.71585	1.5e-36	9.38e-36
>ENA|ELU40711|ELU40711.1	cyclin	264.475	2390.2	0.11065	-3.17593	1.74e-116	5.39e-115
>ENA|ELU44314|ELU44314.1	cystathionine beta-synthase	803.775	4542.48	0.176946	-2.49862	3.65e-50	3.31e-49
>ENA|ELU43261|ELU43261.1	cystathionine gamma-synthase	1233.95	158.986	7.76133	2.9563	8.4e-81	1.4e-79
>ENA|ELU39323|ELU39323.1	cysteine synthase	1425.51	331.992	4.2938	2.10226	6.57e-50	5.89e-49
>ENA|ELU40412|ELU40412.1	cytochrome C domain-containing	13597.3	3360.61	4.04609	2.01653	1.13e-60	1.27e-59
>ENA|ELU42077|ELU42077.1	cytochrome P450	530.326	108.727	4.87758	2.28617	7.2e-20	2.59e-19
>ENA|ELU44132|ELU44132.1	cytochrome P450	43.0919	260.486	0.165429	-2.59572	1.26e-18	4.34e-18
>ENA|ELU37554|ELU37554.1	cytochrome p450	107.85	364.919	0.295547	-1.75854	6.82e-18	2.29e-17
>ENA|ELU37407|ELU37407.1	cytochrome P450	23.3312	864.993	0.0269727	-5.21236	1.28e-183	8.23e-182
>ENA|ELU39069|ELU39069.1	cytochrome P450	310.63	2717.57	0.114304	-3.12905	1.46e-118	4.65e-117
>ENA|ELU38333|ELU38333.1	cytochrome P450 domain-containing	417.012	100.494	4.1496	2.05297	1.48e-28	7.29e-28
>ENA|ELU45686|ELU45686.1	cytochrome P450 domain-containing	645.178	103.996	6.20386	2.63317	4.26e-48	3.69e-47
>ENA|ELU37641|ELU37641.1	cytochrome P450 domain-containing	475.426	131.624	3.61201	1.8528	1.06e-27	5.08e-27
>ENA|ELU36452|ELU36452.1	cytochrome P450 domain-containing	12.4367	230.58	0.0539368	-4.21259	1.57e-36	9.81e-36
>ENA|ELU40383|ELU40383.1	cytochrome P450 domain-containing	91.8552	356.039	0.257992	-1.9546	2.57e-18	8.76e-18
>ENA|ELU37292|ELU37292.1	cytochrome P450 domain-containing	105.435	379.044	0.278162	-1.846	5.29e-18	1.78e-17
>ENA|ELU41908|ELU41908.1	cytochrome P450 domain-containing	1296.7	394.233	3.28917	1.71772	1.81e-36	1.13e-35
>ENA|ELU37677|ELU37677.1	cytochrome P450 domain-containing	41.3753	710.984	0.0581945	-4.10297	1.15e-84	2.07e-83
>ENA|ELU36446|ELU36446.1	cytochrome P450 domain-containing	161.104	966.451	0.166697	-2.5847	1.34e-62	1.58e-61
>ENA|ELU40593|ELU40593.1	cytochrome P450 domain-containing	138.719	1546.29	0.0897109	-3.47857	1.24e-123	4.18e-122
>ENA|ELU40781|ELU40781.1	cytochrome P450 domain-containing protein	402.141	119.796	3.35689	1.74713	1.19e-21	4.58e-21
>ENA|ELU36691|ELU36691.1	cytochrome P450 monooxygenase	58.1675	216.872	0.268211	-1.89856	5.11e-21	1.93e-20
>ENA|ELU45646|ELU45646.1	cytochrome P450 monooxygenase	270.835	6391.12	0.0423768	-4.56058	6.3e-171	3.51e-169
>ENA|ELU38293|ELU38293.1	cytochrome P450 monooxygenase pc-1	207.966	1089.51	0.19088	-2.38926	3.22e-34	1.87e-33
>ENA|ELU36963|ELU36963.1	cytochrome P450 monooxygenase pc-3	449.992	145.067	3.10196	1.63318	4.25e-23	1.73e-22
>ENA|ELU36615|ELU36615.1	cytochrome P450 monooxygenase pc-bph	2397.71	485.261	4.94107	2.30482	2.79e-64	3.41e-63
>ENA|ELU36619|ELU36619.1	cytochrome P450 monooxygenase pc-bph	220.622	1521.61	0.144992	-2.78595	7.67e-86	1.41e-84
>ENA|ELU45953|ELU45953.1	cytochrome P450 oxidoreductase	139.154	2914.03	0.0477531	-4.38826	1.03e-201	7.7e-200
>ENA|ELU41976|ELU41976.1	cytochrome P450 oxidoreductase	117.112	3291.53	0.03558	-4.81279	1.43e-230	1.47e-228
>ENA|ELU43190|ELU43190.1	cytoplasmic protein	548.649	1703.42	0.322087	-1.63448	1.72e-35	1.05e-34
>ENA|ELU39106|ELU39106.1	cytoplasmic protein	15625.9	3071.09	5.08804	2.34711	4.21e-52	4e-51
>ENA|ELU45593|ELU45593.1	cytoplasmic tRNA 2-thiolation 1	7894.94	240.77	32.7903	5.0352	1.7e-45	1.37e-44
>ENA|ELU39872|ELU39872.1	D-xylose reductase	6074.03	1963.83	3.09295	1.62898	1.35e-39	9.23e-39
>ENA|ELU36024|ELU36024.1	DAO domain-containing	946.409	256.569	3.68871	1.88312	4.62e-37	2.94e-36
>ENA|ELU39356|ELU39356.1	DAO domain-containing protein	593.982	129.978	4.56988	2.19216	1.57e-30	8.27e-30
>ENA|ELU39430|ELU39430.1	dCMP deaminase	336.547	95.8635	3.51069	1.81175	4.46e-22	1.76e-21
>ENA|ELU39973|ELU39973.1	DEAD domain-containing	867.256	189.938	4.56601	2.19093	9.28e-46	7.61e-45
>ENA|ELU39778|ELU39778.1	DEAD domain-containing protein	868.559	154.047	5.63828	2.49526	1.71e-60	1.92e-59
>ENA|ELU40327|ELU40327.1	defects in morphology 1	1200.42	167.078	7.18481	2.84495	1.55e-75	2.38e-74
>ENA|ELU38395|ELU38395.1	delta 9-fatty acid desaturase	981.022	7542.55	0.130065	-2.94269	2.52e-73	3.72e-72
>ENA|ELU36869|ELU36869.1	delta-12 fatty acid desaturase	5850.17	124829	0.0468655	-4.41533	7.44e-240	8.84e-238
>ENA|ELU43442|ELU43442.1	delta24(24-1) sterol reductase	491.02	62.1223	7.90409	2.9826	1.77e-54	1.76e-53
>ENA|ELU39370|ELU39370.1	DER1 domain-containing	270.433	1790.31	0.151054	-2.72687	1.24e-86	2.36e-85
>ENA|ELU39591|ELU39591.1	deuterolysin M35 metalloprotease	660.031	91.5764	7.20744	2.84949	5.15e-58	5.52e-57
>ENA|ELU44797|ELU44797.1	deuterolysin M35 metalloprotease	1181.32	200.558	5.89019	2.55831	2.56e-21	9.78e-21
>ENA|ELU43735|ELU43735.1	DHDPS domain-containing	878.787	101.74	8.63756	3.11062	5.22e-61	5.95e-60
>ENA|ELU44373|ELU44373.1	dihydrodipicolinate synthase	2416.97	679.916	3.55481	1.82977	1.93e-41	1.39e-40
>ENA|ELU44167|ELU44167.1	dihydrodipicolinate synthetase	408.244	25.239	16.1751	4.0157	1.39e-72	2.01e-71
>ENA|ELU37035|ELU37035.1	dihydroxy-acid dehydratase	1281.51	377.206	3.39736	1.76442	9.97e-36	6.09e-35
>ENA|ELU43495|ELU43495.1	dimeric dihydrodiol dehydrogenase	1039.71	140.683	7.39046	2.88566	2.98e-74	4.52e-73
>ENA|ELU45528|ELU45528.1	dipeptidyl peptidase III	3114.61	427.285	7.28929	2.86578	1.31e-97	3.09e-96
>ENA|ELU41530|ELU41530.1	diphenol oxidase-A2	2639.42	589.224	4.47949	2.16333	9.82e-60	1.09e-58
>ENA|ELU38465|ELU38465.1	diphosphomevalonate decarboxylase	1603.49	309.471	5.18139	2.37334	1.42e-62	1.67e-61
>ENA|ELU45882|ELU45882.1	disulfide isomerase	5509.43	21987	0.250577	-1.99667	1.15e-59	1.28e-58
>ENA|ELU36180|ELU36180.1	DivIC domain-containing protein	1260.59	12632.1	0.0997928	-3.32492	5.95e-146	2.69e-144
>ENA|ELU42480|ELU42480.1	DLH domain-containing	389.113	108.394	3.5898	1.8439	6.92e-27	3.21e-26
>ENA|ELU44470|ELU44470.1	DLH domain-containing	1209.96	373.669	3.23807	1.69513	3.55e-36	2.19e-35
>ENA|ELU42604|ELU42604.1	DNA replication licensing factor mcm2	1831.39	447.929	4.08858	2.0316	8.38e-51	7.79e-50
>ENA|ELU36485|ELU36485.1	DNA replication licensing factor mcm4	1102.06	331.594	3.32353	1.73272	2.09e-34	1.23e-33
>ENA|ELU38298|ELU38298.1	DNA replication licensing factor mcm6	1256.64	309.726	4.05727	2.02051	1.24e-45	1.01e-44
>ENA|ELU36531|ELU36531.1	DNA-J related domain-containing	86.4296	820.162	0.105381	-3.24631	7.79e-35	4.62e-34
>ENA|ELU40741|ELU40741.1	dnaJ central domain-containing	1445.85	370.187	3.90574	1.96559	1.15e-45	9.34e-45
>ENA|ELU43669|ELU43669.1	DnaJ domain-containing protein	1009.39	305.605	3.30292	1.72374	1.29e-33	7.43e-33
>ENA|ELU40181|ELU40181.1	DnaJ domain-containing protein	423.143	1468.68	0.288111	-1.7953	1.06e-15	3.23e-15
>ENA|ELU37419|ELU37419.1	DnaJ protein	1365.22	363.561	3.75512	1.90886	1.41e-42	1.05e-41
>ENA|ELU40129|ELU40129.1	DSPc domain-containing	2099	6965.18	0.301356	-1.73046	4.13e-44	3.19e-43
>ENA|ELU40453|ELU40453.1	DSS1 SEM1 family domain-containing	2397.36	759.531	3.15637	1.65826	1.36e-36	8.51e-36
>ENA|ELU43476|ELU43476.1	DUF914 domain-containing membrane	1722.66	308.745	5.57956	2.48015	1.17e-69	1.6e-68
>ENA|ELU39247|ELU39247.1	DUSP domain-containing	639.852	200.848	3.18576	1.67164	1.41e-27	6.71e-27
>ENA|ELU38145|ELU38145.1	dynactin p62 family domain-containing	792.962	256.018	3.09729	1.63101	1.59e-27	7.57e-27
>ENA|ELU44053|ELU44053.1	dynamin-2	9447	1001.85	9.42954	3.23719	2.17e-135	8.92e-134
>ENA|ELU45645|ELU45645.1	dynein 1 light intermediate chain	956.744	245.446	3.89797	1.96272	1.27e-39	8.68e-39
>ENA|ELU44928|ELU44928.1	EBP domain-containing	91.5563	406.601	0.225175	-2.15088	1.87e-37	1.21e-36
>ENA|ELU45188|ELU45188.1	ECH domain-containing	197.422	690.904	0.285744	-1.80721	1.19e-34	7.03e-34
>ENA|ELU42573|ELU42573.1	ECSIT domain-containing	696.509	175.445	3.96996	1.98913	4.42e-37	2.81e-36
>ENA|ELU36435|ELU36435.1	efhand domain-containing protein	8399.01	1488.57	5.64232	2.49629	8.11e-23	3.27e-22
>ENA|ELU45058|ELU45058.1	elongation factor 1 beta/delta chain	11356.2	3280.98	3.46123	1.79128	5.79e-31	3.09e-30
>ENA|ELU43120|ELU43120.1	elongation factor 1-alpha	205708	25195.4	8.16452	3.02937	5.4e-130	2.06e-128
>ENA|ELU38673|ELU38673.1	elongation factor 2	65002.8	20286.6	3.20423	1.67998	2.98e-44	2.31e-43
>ENA|ELU38939|ELU38939.1	elongation factor 3	31984.7	8293.07	3.8568	1.9474	8.11e-36	4.97e-35
>ENA|ELU41553|ELU41553.1	elongator complex 2	1025.59	250.734	4.09036	2.03223	2.06e-44	1.6e-43
>ENA|ELU42908|ELU42908.1	endo-beta-1	391.802	124.032	3.15888	1.65941	3.92e-21	1.49e-20
>ENA|ELU42495|ELU42495.1	endonuclease LCL3	548.6	118.83	4.61666	2.20685	8.65e-38	5.64e-37
>ENA|ELU45582|ELU45582.1	endopeptidase	3208.53	19827.1	0.161826	-2.62749	3.61e-49	3.17e-48
>ENA|ELU42645|ELU42645.1	endoplasmic oxidoreductin-1	327.327	1207.08	0.271173	-1.88272	2.47e-43	1.87e-42
>ENA|ELU42598|ELU42598.1	endoplasmic reticulum	427.566	2850.21	0.150012	-2.73685	3.49e-95	7.85e-94
>ENA|ELU36509|ELU36509.1	endoplasmic reticulum metallopeptidase 1	129.358	2614.33	0.0494804	-4.337	4.9e-96	1.12e-94
>ENA|ELU41041|ELU41041.1	endoplasmic reticulum-derived transport vesicle ERV46	243.288	860.219	0.282821	-1.82204	1.15e-37	7.43e-37
>ENA|ELU40475|ELU40475.1	endoplasmic reticulum-derived transport vesicle ERV46	1095.46	3576.31	0.306309	-1.70694	1.13e-41	8.26e-41
>ENA|ELU40338|ELU40338.1	enoyl- hydratase isomerase family	489.439	126.562	3.86718	1.95128	4.96e-31	2.65e-30
>ENA|ELU39091|ELU39091.1	EOS1 domain-containing	735.763	9540.08	0.0771233	-3.69669	2.97e-170	1.63e-168
>ENA|ELU41526|ELU41526.1	eukaryotic ADP ATP carrier	51890.4	6693.56	7.75229	2.95462	3.04e-24	1.3e-23
>ENA|ELU40087|ELU40087.1	eukaryotic cytochrome b561 domain-containing	269.71	1332.9	0.202348	-2.30509	6.91e-41	4.92e-40
>ENA|ELU41959|ELU41959.1	eukaryotic translation initiation factor 2 subunit alpha	2170.43	633.039	3.42859	1.77761	3.86e-41	2.76e-40
>ENA|ELU42523|ELU42523.1	eukaryotic translation initiation factor 2B	1209.21	232.224	5.20709	2.38048	1.21e-58	1.31e-57
>ENA|ELU39590|ELU39590.1	eukaryotic translation initiation factor 3	820.13	163.738	5.00879	2.32446	4.24e-40	2.94e-39
>ENA|ELU45564|ELU45564.1	eukaryotic translation initiation factor 3	2295.13	553.467	4.14682	2.05201	6.08e-54	6e-53
>ENA|ELU44452|ELU44452.1	eukaryotic translation initiation factor 3 subunit 6	2305.38	682.272	3.37898	1.75659	1.11e-40	7.86e-40
>ENA|ELU37037|ELU37037.1	eukaryotic translation initiation factor 3 subunit 6	3045.52	699.315	4.35501	2.12268	1.24e-59	1.37e-58
>ENA|ELU37762|ELU37762.1	eukaryotic translation initiation factor 3 subunit 7	5116.2	1266.24	4.04045	2.01452	4.77e-57	4.99e-56
>ENA|ELU41759|ELU41759.1	eukaryotic translation initiation factor 4E binding domain-containing protein	1331	9383.14	0.14185	-2.81757	1.53e-43	1.17e-42
>ENA|ELU42610|ELU42610.1	eukaryotic translation initiation factor 5C	11460.3	2076.61	5.51877	2.46435	6.68e-57	6.95e-56
>ENA|ELU40086|ELU40086.1	EutQ domain-containing protein	786.82	4597.5	0.171141	-2.54675	3.29e-87	6.34e-86
>ENA|ELU43045|ELU43045.1	exo-beta-1	963.898	3105.42	0.310392	-1.68784	3.55e-40	2.47e-39
>ENA|ELU37198|ELU37198.1	exo-beta-1	1090.12	4088.34	0.26664	-1.90703	2.77e-26	1.26e-25
>ENA|ELU36357|ELU36357.1	exocellobiohydrolase	3209.17	122.541	26.1885	4.71086	9.36e-198	6.77e-196
>ENA|ELU39651|ELU39651.1	exosome component 4	7861.21	2587.92	3.03766	1.60296	5.39e-39	3.61e-38
>ENA|ELU45664|ELU45664.1	EXP1-like protein	9188.33	2866.98	3.20489	1.68027	4.82e-35	2.89e-34
>ENA|ELU37967|ELU37967.1	extracellular invertase	716.382	49.0468	14.6061	3.8685	4.62e-65	5.74e-64
>ENA|ELU38923|ELU38923.1	extracellular triacylglycerol lipase precursor	74.2724	1221.08	0.0608252	-4.03919	9.4e-144	4.2e-142
>ENA|ELU39357|ELU39357.1	F-box domain-containing protein	172.84	699.845	0.246969	-2.0176	2.79e-17	9.1e-17
>ENA|ELU38524|ELU38524.1	F-box-like domain-containing	1646.71	455.382	3.61611	1.85444	8.03e-16	2.47e-15
>ENA|ELU36717|ELU36717.1	F-box-like domain-containing	4915.65	530.09	9.27323	3.21307	1.53e-124	5.23e-123
>ENA|ELU45647|ELU45647.1	F-box-like domain-containing	324.041	1559.55	0.207778	-2.26688	1.19e-61	1.37e-60
>ENA|ELU38257|ELU38257.1	F-box-like domain-containing	1030.9	3641.88	0.283068	-1.82078	1.77e-46	1.49e-45
>ENA|ELU36956|ELU36956.1	FAD binding domain-containing	87.2515	486.612	0.179304	-2.47952	1.28e-49	1.14e-48
>ENA|ELU39961|ELU39961.1	FAD binding domain-containing protein	161.511	1029.29	0.156915	-2.67195	1.43e-76	2.24e-75
>ENA|ELU44420|ELU44420.1	FAD binding domain-containing protein	635.739	2014.54	0.315575	-1.66395	3.99e-37	2.55e-36
>ENA|ELU40474|ELU40474.1	FAD FMN-containing	195.463	6865.63	0.0284698	-5.13443	2.05e-59	2.26e-58
>ENA|ELU45873|ELU45873.1	fatty acid elongase 3-ketoacyl- synthase 1 domain-containing	698.575	2207.03	0.316523	-1.65962	7.57e-38	4.95e-37
>ENA|ELU42157|ELU42157.1	ferric reductase NAD binding domain-containing	237.536	1208	0.196635	-2.3464	1.04e-60	1.18e-59
>ENA|ELU43022|ELU43022.1	ferric-chelate reductase (Fre2)	1372.41	77.8105	17.6378	4.1406	5.9e-133	2.31e-131
>ENA|ELU41055|ELU41055.1	Ferritin-like domain-containing	215.73	31335.9	0.00688442	-7.18245	0	0
>ENA|ELU45697|ELU45697.1	fibronectin type III BRCA1 domain-containing	4261.39	745.467	5.71641	2.51511	7.2e-61	8.17e-60
>ENA|ELU39996|ELU39996.1	Filament domain-containing	213.395	2223.78	0.0959602	-3.38142	2.59e-127	9.47e-126
>ENA|ELU42827|ELU42827.1	folic acid and derivative biosynthesis-related	652.815	147.139	4.43673	2.1495	3.09e-40	2.16e-39
>ENA|ELU38450|ELU38450.1	formate dehydrogenase	29219.1	3463.56	8.43616	3.07659	6.22e-101	1.55e-99
>ENA|ELU43219|ELU43219.1	formin-like region domain-containing	46.6901	386.4	0.120834	-3.04891	4.5e-30	2.33e-29
>ENA|ELU42474|ELU42474.1	formyl transferase domain-containing	381.18	104.381	3.65181	1.86861	9.16e-26	4.07e-25
>ENA|ELU38520|ELU38520.1	Frag1 domain-containing	89.4095	1038.99	0.0860542	-3.53861	1.85e-73	2.76e-72
>ENA|ELU41948|ELU41948.1	fructose-bisphosphate aldolase	14645.7	3847.09	3.80695	1.92864	8.94e-56	9.13e-55
>ENA|ELU44323|ELU44323.1	FtsJ domain-containing protein	113.748	946.956	0.120119	-3.05746	1.17e-90	2.37e-89
>ENA|ELU39068|ELU39068.1	FtsJ domain-containing protein	293.273	2113.74	0.138746	-2.84948	2.53e-99	6.08e-98
>ENA|ELU36808|ELU36808.1	fungal specific transcription factor domain-containing	157.228	651.583	0.241302	-2.05109	7.55e-27	3.5e-26
>ENA|ELU39509|ELU39509.1	fungal specific transcription factor domain-containing protein	1073.52	4734.51	0.226743	-2.14087	2.47e-64	3.03e-63
>ENA|ELU45743|ELU45743.1	fungal zn(2)-Cys(6) binuclear cluster domain-containing	123.576	569.418	0.217022	-2.20409	5.75e-50	5.17e-49
>ENA|ELU39620|ELU39620.1	fungal zn(2)-Cys(6) binuclear cluster domain-containing	125.489	598.435	0.209696	-2.25363	1.27e-46	1.07e-45
>ENA|ELU36722|ELU36722.1	fungal zn(2)-Cys(6) binuclear cluster domain-containing	40.5774	683.595	0.0593589	-4.07439	1.02e-85	1.85e-84
>ENA|ELU42966|ELU42966.1	fungal zn(2)-Cys(6) binuclear cluster domain-containing	116.94	950.419	0.123041	-3.02279	3.91e-88	7.65e-87
>ENA|ELU37685|ELU37685.1	fungal zn(2)-Cys(6) binuclear cluster domain-containing	10488.2	1833.16	5.72139	2.51637	5.62e-50	5.06e-49
>ENA|ELU41745|ELU41745.1	fungal zn(2)-Cys(6) binuclear cluster domain-containing protein	892.897	16.6297	53.6928	5.74666	8.17e-143	3.6e-141
>ENA|ELU35548|ELU35548.1	fungalysin metallopeptidase (M36) domain-containing	4.73748	494.57	0.00957898	-6.70591	7.24e-94	1.58e-92
>ENA|ELU35710|ELU35710.1	fungalysin metallopeptidase (M36) domain-containing protein	12.4583	1215.79	0.0102471	-6.60864	3.14e-241	3.88e-239
>ENA|ELU36583|ELU36583.1	FUSC domain-containing	838.987	145.058	5.78382	2.53202	4.47e-56	4.6e-55
>ENA|ELU44946|ELU44946.1	G- alpha subunit	220.531	3636.1	0.0606503	-4.04334	1.84e-182	1.16e-180
>ENA|ELU38307|ELU38307.1	G-alpha domain-containing	198.406	6023.56	0.0329383	-4.92409	3.62e-206	2.88e-204
>ENA|ELU44380|ELU44380.1	g2 mitotic-specific cyclin cdc13	901.945	3690.79	0.244377	-2.03282	3.41e-57	3.58e-56
>ENA|ELU42329|ELU42329.1	GAMM1 protein	973.125	293.849	3.31166	1.72755	1.11e-32	6.23e-32
>ENA|ELU42348|ELU42348.1	gamma-butyrobetaine hydroxylase	1333.99	350.158	3.80968	1.92967	4.21e-42	3.1e-41
>ENA|ELU39512|ELU39512.1	GDP-fucose transporter 1	200.635	2282.63	0.0878963	-3.50805	6.62e-105	1.73e-103
>ENA|ELU39514|ELU39514.1	GDP-L-fucose synthetase	3520.58	483.23	7.28552	2.86503	2.21e-99	5.34e-98
>ENA|ELU42839|ELU42839.1	GDP-mannose 4,6-dehydratase	6305.14	1526.88	4.12943	2.04594	1.06e-59	1.18e-58
>ENA|ELU42580|ELU42580.1	GDSL lipase acylhydrolase	671.127	102.161	6.56928	2.71574	4.53e-58	4.86e-57
>ENA|ELU40245|ELU40245.1	GLTP domain-containing	7453.14	2103.59	3.54307	1.825	2.01e-49	1.77e-48
>ENA|ELU40694|ELU40694.1	glucanase	5626.21	117.943	47.7029	5.57601	1.31e-277	2.42e-275
>ENA|ELU38847|ELU38847.1	glucose transporter	1144.5	5838.31	0.196033	-2.35083	3.95e-51	3.69e-50
>ENA|ELU38062|ELU38062.1	glutamate carboxypeptidase	3693.9	614.741	6.00887	2.58709	1.41e-83	2.49e-82
>ENA|ELU38063|ELU38063.1	glutamate carboxypeptidase	378.087	12803.3	0.0295303	-5.08166	4.2e-285	8e-283
>ENA|ELU39983|ELU39983.1	glutamate decarboxylase	5617.8	205.338	27.3588	4.77394	8.04e-238	9.2e-236
>ENA|ELU38324|ELU38324.1	glutamate dehydrogenase (NADP+)	3693.77	287.038	12.8686	3.68578	2.67e-57	2.82e-56
>ENA|ELU43378|ELU43378.1	glutamate-cysteine ligase catalytic subunit	51.377	622.975	0.0824704	-3.59998	1.66e-94	3.68e-93
>ENA|ELU39933|ELU39933.1	glutamate-rich WD repeat-containing	1364.7	428.904	3.18183	1.66986	5.44e-34	3.15e-33
>ENA|ELU44698|ELU44698.1	glutamate-tRNA ligase	4054.18	1102.4	3.67759	1.87876	2.01e-49	1.78e-48
>ENA|ELU41347|ELU41347.1	glutamyl-tRNA(Gln) amidotransferase subunit A	89.3319	286.352	0.311965	-1.68054	1.52e-21	5.87e-21
>ENA|ELU38037|ELU38037.1	Glutaredoxin domain-containing	5207.22	17247.5	0.301911	-1.72781	1.35e-23	5.58e-23
>ENA|ELU42640|ELU42640.1	Glutaredoxin domain-containing protein	507.122	2376.87	0.213357	-2.22866	1.59e-43	1.21e-42
>ENA|ELU45264|ELU45264.1	glutathione S-transferase	2445.86	36898.2	0.0662867	-3.91514	1.28e-68	1.7e-67
>ENA|ELU41572|ELU41572.1	glycerol dehydrogenase	2601.62	263.752	9.86389	3.30216	2.01e-84	3.57e-83
>ENA|ELU42446|ELU42446.1	glycine hydroxymethyltransferase	8988.75	1865.57	4.81822	2.2685	2.08e-73	3.1e-72
>ENA|ELU43609|ELU43609.1	glycogen debranching enzyme	8154.38	1129.22	7.22126	2.85225	2.96e-108	8.2e-107
>ENA|ELU40207|ELU40207.1	glycogen phosphorylase	24029	6980.56	3.44228	1.78336	1.26e-45	1.02e-44
>ENA|ELU41358|ELU41358.1	glycogen synthase	19249.5	1283.31	14.9999	3.90688	1.02e-133	4.13e-132
>ENA|ELU39683|ELU39683.1	glycophorin A domain-containing	73.5079	784.589	0.0936897	-3.41597	5.66e-93	1.2e-91
>ENA|ELU37656|ELU37656.1	glycoside hydrolase family	419.174	85.8767	4.88111	2.28721	8.38e-34	4.84e-33
>ENA|ELU43198|ELU43198.1	glycoside hydrolase family	97.7897	872.41	0.112091	-3.15725	4.1e-88	8e-87
>ENA|ELU39236|ELU39236.1	glycoside hydrolase family 13	431.615	49.5095	8.71783	3.12397	1.09e-38	7.24e-38
>ENA|ELU36796|ELU36796.1	glycoside hydrolase family 13	98.595	396.625	0.248585	-2.00819	7.64e-33	4.32e-32
>ENA|ELU40800|ELU40800.1	glycoside hydrolase family 13 protein	1190.02	143.287	8.30516	3.05401	6.88e-86	1.28e-84
>ENA|ELU40988|ELU40988.1	glycoside hydrolase family 15 and carbohydrate-binding module fa	4095.86	684.342	5.9851	2.58138	1.36e-84	2.42e-83
>ENA|ELU36680|ELU36680.1	glycoside hydrolase family 16	590.929	109.717	5.38594	2.4292	9.16e-45	7.19e-44
>ENA|ELU43031|ELU43031.1	glycoside hydrolase family 16	139.936	1219.88	0.114713	-3.1239	1.41e-101	3.57e-100
>ENA|ELU41960|ELU41960.1	glycoside hydrolase family 16	126.137	1752.54	0.0719738	-3.79638	4.03e-145	1.81e-143
>ENA|ELU41426|ELU41426.1	glycoside hydrolase family 16	354.821	2466.39	0.143862	-2.79724	3.63e-96	8.38e-95
>ENA|ELU43193|ELU43193.1	glycoside hydrolase family 16 protein	105.627	336.401	0.313992	-1.6712	1.61e-23	6.64e-23
>ENA|ELU41403|ELU41403.1	glycoside hydrolase family 2	652.213	128.251	5.08543	2.34637	1.44e-45	1.17e-44
>ENA|ELU36789|ELU36789.1	glycoside hydrolase family 5	1788.78	15122.1	0.118289	-3.07961	1.85e-63	2.23e-62
>ENA|ELU44858|ELU44858.1	glycoside hydrolase family 71	1148.42	98.3853	11.6727	3.54506	5.69e-105	1.49e-103
>ENA|ELU44134|ELU44134.1	glycoside hydrolase family 79	2569.03	8380.51	0.306549	-1.70581	5.38e-31	2.88e-30
>ENA|ELU38064|ELU38064.1	glycoside hydrolase family 95	2109.28	183.682	11.4834	3.52147	1.13e-123	3.84e-122
>ENA|ELU41329|ELU41329.1	glycosyl hydrolase family 10 domain-containing	1359.38	25.4778	53.3556	5.73757	9.49e-179	5.8e-177
>ENA|ELU41328|ELU41328.1	glycosyl hydrolase family 10 domain-containing	2049.75	46.3874	44.1877	5.46557	5.76e-203	4.42e-201
>ENA|ELU42320|ELU42320.1	glycosyl hydrolase family 61 domain-containing	625.165	4557.76	0.137165	-2.86602	6.84e-106	1.83e-104
>ENA|ELU38904|ELU38904.1	glycosyl hydrolase family 61 domain-containing	3705.74	19074	0.194283	-2.36377	2.02e-39	1.37e-38
>ENA|ELU45307|ELU45307.1	glycosyl hydrolase family 61 domain-containing	15012.3	49027.5	0.306202	-1.70745	4.86e-45	3.86e-44
>ENA|ELU45836|ELU45836.1	glycosyl hydrolase family 9 domain-containing	132.466	1515.51	0.0874063	-3.51612	6.64e-64	8.08e-63
>ENA|ELU41662|ELU41662.1	glycosyl hydrolase family 9 domain-containing	152.025	2936.62	0.0517685	-4.27178	2.6e-189	1.72e-187
>ENA|ELU45835|ELU45835.1	glycosyl hydrolase family 9 domain-containing	1181.8	4628.23	0.255346	-1.96947	2.33e-54	2.33e-53
>ENA|ELU41639|ELU41639.1	glycosyl hydrolase family 9 domain-containing protein	42.3707	777.358	0.054506	-4.19744	1.69e-40	1.19e-39
>ENA|ELU38710|ELU38710.1	Glycosyl hydrolase type III chitinase	362.031	69.484	5.21028	2.38136	7.16e-33	4.06e-32
>ENA|ELU42384|ELU42384.1	glycosyltransferase family 1	14235.8	1953.32	7.28804	2.86553	2.48e-112	7.43e-111
>ENA|ELU39296|ELU39296.1	glycosyltransferase family 15	91.3487	441.093	0.207096	-2.27163	2.74e-39	1.85e-38
>ENA|ELU38420|ELU38420.1	glycosyltransferase family 2 protein	1407.4	5142.2	0.273695	-1.86936	4.17e-50	3.77e-49
>ENA|ELU38646|ELU38646.1	glycosyltransferase family 8 protein	21.0016	3558.58	0.00590169	-7.40466	0	0
>ENA|ELU38403|ELU38403.1	GMC oxidoreductase	2787.74	470.894	5.9201	2.56562	1.16e-82	2.01e-81
>ENA|ELU43373|ELU43373.1	GMC oxidoreductase	209.576	639.761	0.327585	-1.61006	3.32e-27	1.56e-26
>ENA|ELU40827|ELU40827.1	GMC oxidoreductase	116.34	2610.71	0.0445628	-4.48802	1.2e-202	9.13e-201
>ENA|ELU38815|ELU38815.1	GMC oxidoreductase domain-containing protein	48.6778	203.752	0.238907	-2.06548	1.8e-28	8.84e-28
>ENA|ELU44051|ELU44051.1	GPI-anchored domain-containing	1858.66	363.772	5.10943	2.35316	2.96e-64	3.62e-63
>ENA|ELU41901|ELU41901.1	GPI-anchored domain-containing	1594.81	6361.2	0.250709	-1.99591	4.43e-43	3.35e-42
>ENA|ELU38109|ELU38109.1	GPR1 FUN34 yaaH family domain-containing	1300.77	23650.1	0.0550006	-4.18441	2.28e-176	1.31e-174
>ENA|ELU39632|ELU39632.1	GPR1/FUN34/yaaH family domain-containing protein	461.293	150.304	3.06907	1.6178	2.04e-09	4.47e-09
>ENA|ELU37877|ELU37877.1	GrfA protein	444.711	4042.88	0.109999	-3.18444	5.65e-128	2.09e-126
>ENA|ELU36143|ELU36143.1	group II decarboxylase	3.40891	797.832	0.00427271	-7.87063	5.13e-30	2.65e-29
>ENA|ELU45012|ELU45012.1	gti1 Pac2 family domain-containing	356.239	8324.85	0.0427922	-4.54651	7.12e-108	1.95e-106
>ENA|ELU38562|ELU38562.1	gti1/Pac2 family domain-containing protein	2214.68	161.966	13.6737	3.77333	1.11e-133	4.44e-132
>ENA|ELU41816|ELU41816.1	GTP cyclohydrolase I	377.358	92.7122	4.07021	2.0251	1.51e-30	7.95e-30
>ENA|ELU42904|ELU42904.1	GTPase	796.797	167.925	4.74496	2.2464	3.46e-46	2.87e-45
>ENA|ELU45126|ELU45126.1	guanine nucleotide binding protein beta subunit	11226.2	1459.79	7.69029	2.94304	8.77e-84	1.55e-82
>ENA|ELU44945|ELU44945.1	GYF domain-containing	1682.26	5379.06	0.312743	-1.67695	7.5e-42	5.51e-41
>ENA|ELU44619|ELU44619.1	heat shock 70 kDa	21708.7	3920.13	5.53775	2.4693	2.95e-37	1.9e-36
>ENA|ELU44813|ELU44813.1	heat shock 70 kDa protein	39629.5	11661.6	3.39829	1.76481	1.91e-48	1.66e-47
>ENA|ELU45756|ELU45756.1	heat shock 82	20052.8	3657.8	5.4822	2.45475	7.33e-87	1.4e-85
>ENA|ELU38732|ELU38732.1	heat shock HSP60	3767.36	1127.39	3.34167	1.74057	1.69e-42	1.26e-41
>ENA|ELU42477|ELU42477.1	heat shock Hsp88	14694.1	4125.45	3.56182	1.83261	4.57e-51	4.27e-50
>ENA|ELU39161|ELU39161.1	heat shock SSC1	9920.49	3221.57	3.0794	1.62265	2.04e-40	1.43e-39
>ENA|ELU41299|ELU41299.1	helicase domain-containing	1211.95	296.342	4.08972	2.032	1.91e-45	1.54e-44
>ENA|ELU38137|ELU38137.1	heme oxygenase domain-containing	435.467	1640.76	0.265405	-1.91373	8.53e-46	7e-45
>ENA|ELU36224|ELU36224.1	Hemopexin domain-containing	90.0132	2830.45	0.0318017	-4.97475	1.51e-188	9.89e-187
>ENA|ELU44349|ELU44349.1	hexokinase	7245.18	1960.54	3.69551	1.88577	5.49e-52	5.22e-51
>ENA|ELU41361|ELU41361.1	hexose transporter	7667.71	1067.9	7.1802	2.84402	8.2e-107	2.22e-105
>ENA|ELU43613|ELU43613.1	histidine phosphatase superfamily domain-containing	365.326	92.4862	3.95006	1.98188	5.08e-27	2.37e-26
>ENA|ELU41555|ELU41555.1	histidine phosphatase superfamily domain-containing	490.413	114.772	4.27293	2.09523	3.12e-33	1.78e-32
>ENA|ELU36447|ELU36447.1	histidine phosphatase superfamily domain-containing	732.692	225.73	3.24588	1.69861	1.21e-28	6.02e-28
>ENA|ELU44200|ELU44200.1	histidine phosphatase superfamily domain-containing	88.3338	416.983	0.21184	-2.23895	3.49e-38	2.29e-37
>ENA|ELU36817|ELU36817.1	histidinol-phosphate transaminase	1322.2	184.21	7.17767	2.84352	5.32e-62	6.2e-61
>ENA|ELU39461|ELU39461.1	histidyl-tRNA synthetase	2201.49	274.093	8.03191	3.00574	2.23e-99	5.38e-98
>ENA|ELU35579|ELU35579.1	Histone domain-containing	94.068	981.314	0.0958592	-3.38294	2.81e-11	6.83e-11
>ENA|ELU40305|ELU40305.1	Histone domain-containing	181.719	1199.89	0.151446	-2.72312	2.82e-22	1.12e-21
>ENA|ELU41627|ELU41627.1	Histone domain-containing	640.005	6432.4	0.0994971	-3.3292	8.17e-42	5.99e-41
>ENA|ELU43893|ELU43893.1	Histone domain-containing	2143.32	7303.9	0.293449	-1.76882	8.73e-25	3.76e-24
>ENA|ELU41628|ELU41628.1	Histone domain-containing	789.087	7514.78	0.105005	-3.25147	1.89e-65	2.37e-64
>ENA|ELU41511|ELU41511.1	Histone domain-containing	2039.93	9024.97	0.226032	-2.1454	4.31e-32	2.37e-31
>ENA|ELU45387|ELU45387.1	Histone domain-containing protein	113.448	390.807	0.29029	-1.78443	3.43e-25	1.5e-24
>ENA|ELU41603|ELU41603.1	histone H3	599.533	7831.13	0.0765577	-3.70731	4.92e-170	2.67e-168
>ENA|ELU41198|ELU41198.1	histone H3	2508.72	8497.7	0.295224	-1.76012	9.35e-38	6.08e-37
>ENA|ELU41166|ELU41166.1	HIT domain-containing	2495.3	792.081	3.15031	1.65549	6.53e-37	4.13e-36
>ENA|ELU39924|ELU39924.1	HLH domain-containing	4440.28	1103.66	4.02323	2.00835	5.41e-56	5.55e-55
>ENA|ELU45639|ELU45639.1	Homeobox domain-containing	298.46	969.387	0.307885	-1.69954	4.9e-13	1.31e-12
>ENA|ELU45643|ELU45643.1	Homeobox domain-containing	1018.83	3368.37	0.30247	-1.72514	1.43e-29	7.28e-29
>ENA|ELU37220|ELU37220.1	Homeobox domain-containing	2160.79	14604.6	0.147953	-2.75679	5.05e-105	1.33e-103
>ENA|ELU42347|ELU42347.1	Homeobox domain-containing protein	1469.63	372.674	3.94347	1.97946	4.1e-18	1.39e-17
>ENA|ELU37413|ELU37413.1	homeodomain transcription factor	2083.93	7429.74	0.280485	-1.834	4.27e-46	3.54e-45
>ENA|ELU40237|ELU40237.1	homogentisate 1	162.609	1502.63	0.108216	-3.20802	4.13e-109	1.15e-107
>ENA|ELU41730|ELU41730.1	homoisocitrate dehydrogenase	563.345	77.4748	7.27134	2.86222	6.64e-61	7.54e-60
>ENA|ELU44571|ELU44571.1	homoserine kinase	740.976	187.052	3.96133	1.98599	3.22e-38	2.13e-37
>ENA|ELU40389|ELU40389.1	HRQ family 1	456.864	5333.91	0.0856527	-3.54536	3.83e-47	3.26e-46
>ENA|ELU38806|ELU38806.1	hydrolase	741.924	225.667	3.2877	1.71708	2.3e-29	1.17e-28
>ENA|ELU37733|ELU37733.1	Hydrolase domain-containing	974.536	298.324	3.26671	1.70784	1.31e-15	3.97e-15
>ENA|ELU45166|ELU45166.1	hypothetical protein	1516.03	216.179	7.01281	2.80999	2.51e-81	4.23e-80
>ENA|ELU45045|ELU45045.1	hypothetical protein	206.499	1148.93	0.179731	-2.47609	1.49e-14	4.28e-14
>ENA|ELU45167|ELU45167.1	hypothetical protein	362.388	1944.89	0.186328	-2.42408	1.13e-60	1.27e-59
>ENA|ELU45059|ELU45059.1	hypothetical protein	355.518	2742.22	0.129646	-2.94735	7.03e-105	1.83e-103
>ENA|ELU45106|ELU45106.1	hypothetical protein	3772.16	11591.8	0.325416	-1.61964	7.08e-15	2.08e-14
>ENA|ELU45962|ELU45962.1	hypothetical protein AG1IA_00022	163.666	738.604	0.221589	-2.17404	1.69e-46	1.42e-45
>ENA|ELU45903|ELU45903.1	hypothetical protein AG1IA_00071	167.141	797.233	0.209651	-2.25394	4.69e-48	4.06e-47
>ENA|ELU45888|ELU45888.1	hypothetical protein AG1IA_00082	71.8752	859.09	0.0836643	-3.57924	1.97e-104	5.08e-103
>ENA|ELU45858|ELU45858.1	hypothetical protein AG1IA_00107	329.052	1742.63	0.188825	-2.40488	8.19e-69	1.09e-67
>ENA|ELU45847|ELU45847.1	hypothetical protein AG1IA_00134	145.331	715.952	0.20299	-2.30052	3.83e-52	3.65e-51
>ENA|ELU45849|ELU45849.1	hypothetical protein AG1IA_00136	28254.8	4297.3	6.575	2.71699	1.16e-65	1.46e-64
>ENA|ELU45787|ELU45787.1	hypothetical protein AG1IA_00195	86.9633	5627.5	0.0154533	-6.01594	0	0
>ENA|ELU45745|ELU45745.1	hypothetical protein AG1IA_00206	104.565	558.848	0.187108	-2.41806	1.78e-43	1.36e-42
>ENA|ELU45746|ELU45746.1	hypothetical protein AG1IA_00207	403.784	1879.95	0.214784	-2.21904	1.93e-45	1.55e-44
>ENA|ELU45758|ELU45758.1	hypothetical protein AG1IA_00219	405.457	81.0232	5.00421	2.32314	2.54e-35	1.53e-34
>ENA|ELU45759|ELU45759.1	hypothetical protein AG1IA_00220	398.058	93.2312	4.26958	2.09409	1.04e-30	5.5e-30
>ENA|ELU45672|ELU45672.1	hypothetical protein AG1IA_00295	3659.01	14072.3	0.260014	-1.94334	1.1e-55	1.12e-54
>ENA|ELU45648|ELU45648.1	hypothetical protein AG1IA_00320	131.98	780.211	0.169159	-2.56354	1.02e-62	1.21e-61
>ENA|ELU45595|ELU45595.1	hypothetical protein AG1IA_00378	371.753	46.7871	7.94563	2.99016	6.41e-23	2.6e-22
>ENA|ELU45578|ELU45578.1	hypothetical protein AG1IA_00393	1959.37	558.664	3.50723	1.81033	2.23e-41	1.61e-40
>ENA|ELU45561|ELU45561.1	hypothetical protein AG1IA_00439	736.392	4283.01	0.171933	-2.54008	7.01e-86	1.3e-84
>ENA|ELU45485|ELU45485.1	hypothetical protein AG1IA_00484	1066.31	3301.96	0.322933	-1.63069	2.18e-20	8.03e-20
>ENA|ELU45481|ELU45481.1	hypothetical protein AG1IA_00497	242.491	56.1109	4.32163	2.11157	3.2e-27	1.5e-26
>ENA|ELU45325|ELU45325.1	hypothetical protein AG1IA_00648	904.56	3296.38	0.27441	-1.86559	8.63e-08	1.72e-07
>ENA|ELU45318|ELU45318.1	hypothetical protein AG1IA_00660	49.842	1085.03	0.0459362	-4.44423	4.32e-161	2.21e-159
>ENA|ELU45295|ELU45295.1	hypothetical protein AG1IA_00676	62.9752	274.995	0.229005	-2.12655	7.71e-33	4.36e-32
>ENA|ELU45297|ELU45297.1	hypothetical protein AG1IA_00678	8062.66	1414.36	5.70059	2.51111	6.43e-87	1.23e-85
>ENA|ELU45277|ELU45277.1	hypothetical protein AG1IA_00679	450.602	91.0976	4.94637	2.30637	1.36e-36	8.53e-36
>ENA|ELU45281|ELU45281.1	hypothetical protein AG1IA_00683	564.894	2774.01	0.203638	-2.29592	4.49e-59	4.9e-58
>ENA|ELU45282|ELU45282.1	hypothetical protein AG1IA_00684	127.685	490.735	0.260191	-1.94236	7.99e-32	4.37e-31
>ENA|ELU45267|ELU45267.1	hypothetical protein AG1IA_00700	131.246	746.205	0.175885	-2.50729	9.02e-56	9.19e-55
>ENA|ELU45260|ELU45260.1	hypothetical protein AG1IA_00711	159.844	1010.96	0.15811	-2.661	6.17e-69	8.25e-68
>ENA|ELU45262|ELU45262.1	hypothetical protein AG1IA_00713	169.386	1803.57	0.0939173	-3.41247	1.61e-127	5.92e-126
>ENA|ELU45233|ELU45233.1	hypothetical protein AG1IA_00739	112.673	510.819	0.220573	-2.18067	1.75e-41	1.26e-40
>ENA|ELU45204|ELU45204.1	hypothetical protein AG1IA_00771	123.481	3947.87	0.0312779	-4.99871	4.56e-253	6.52e-251
>ENA|ELU45198|ELU45198.1	hypothetical protein AG1IA_00773	1777.29	473.955	3.74992	1.90686	1.81e-44	1.41e-43
>ENA|ELU45195|ELU45195.1	hypothetical protein AG1IA_00774	5238.85	1160.88	4.51282	2.17403	1.14e-65	1.43e-64
>ENA|ELU45181|ELU45181.1	hypothetical protein AG1IA_00791	66.0827	386.175	0.171121	-2.54691	1.76e-33	1.01e-32
>ENA|ELU45098|ELU45098.1	hypothetical protein AG1IA_00869	512.266	7329.63	0.0698898	-3.83877	3e-117	9.35e-116
>ENA|ELU45090|ELU45090.1	hypothetical protein AG1IA_00879	5337.89	1194.04	4.47045	2.16042	1.19e-10	2.78e-10
>ENA|ELU45080|ELU45080.1	hypothetical protein AG1IA_00881	5500.79	828.386	6.64038	2.73127	7.93e-12	1.99e-11
>ENA|ELU45078|ELU45078.1	hypothetical protein AG1IA_00898	727.439	233.847	3.11074	1.63726	1.31e-26	6.02e-26
>ENA|ELU45024|ELU45024.1	hypothetical protein AG1IA_00948	891.446	275.421	3.23667	1.69451	8.91e-31	4.73e-30
>ENA|ELU44943|ELU44943.1	hypothetical protein AG1IA_01024	1156.27	5666.25	0.204063	-2.29291	1.64e-72	2.36e-71
>ENA|ELU44909|ELU44909.1	hypothetical protein AG1IA_01064	3394.83	14572.8	0.232957	-2.10186	1.93e-20	7.1e-20
>ENA|ELU44891|ELU44891.1	hypothetical protein AG1IA_01076	889.022	248.257	3.58106	1.84039	2.79e-31	1.51e-30
>ENA|ELU44835|ELU44835.1	hypothetical protein AG1IA_01133	831.785	3011.93	0.276164	-1.85641	1.11e-47	9.48e-47
>ENA|ELU44801|ELU44801.1	hypothetical protein AG1IA_01169	889.772	241.723	3.68095	1.88008	1.87e-36	1.17e-35
>ENA|ELU44722|ELU44722.1	hypothetical protein AG1IA_01242	2806.97	15494	0.181165	-2.46462	4.08e-08	8.32e-08
>ENA|ELU44721|ELU44721.1	hypothetical protein AG1IA_01262	110.452	411.115	0.268664	-1.89613	3.02e-31	1.63e-30
>ENA|ELU44671|ELU44671.1	hypothetical protein AG1IA_01302	32.665	543.125	0.0601426	-4.05547	5.97e-48	5.15e-47
>ENA|ELU44678|ELU44678.1	hypothetical protein AG1IA_01309	152.995	624.53	0.244977	-2.02928	1.6e-39	1.09e-38
>ENA|ELU44650|ELU44650.1	hypothetical protein AG1IA_01318	1862.65	9144.66	0.203687	-2.29558	1.09e-15	3.32e-15
>ENA|ELU44644|ELU44644.1	hypothetical protein AG1IA_01331	770.016	172.495	4.46399	2.15833	1.58e-42	1.18e-41
>ENA|ELU44629|ELU44629.1	hypothetical protein AG1IA_01337	3233.73	735.173	4.3986	2.13704	1.57e-50	1.45e-49
>ENA|ELU44607|ELU44607.1	hypothetical protein AG1IA_01349	323.327	1002.25	0.3226	-1.63218	7.57e-24	3.17e-23
>ENA|ELU44616|ELU44616.1	hypothetical protein AG1IA_01358	737.542	3560.48	0.207147	-2.27128	4.63e-29	2.32e-28
>ENA|ELU44624|ELU44624.1	hypothetical protein AG1IA_01366	343.094	3661.33	0.0937075	-3.41569	3.81e-138	1.62e-136
>ENA|ELU44627|ELU44627.1	hypothetical protein AG1IA_01369	583.025	125.493	4.64586	2.21595	1.93e-23	7.95e-23
>ENA|ELU44578|ELU44578.1	hypothetical protein AG1IA_01370	1270.84	317.602	4.00137	2.00049	3.17e-45	2.53e-44
>ENA|ELU44589|ELU44589.1	hypothetical protein AG1IA_01381	1590.74	94592.8	0.0168167	-5.89396	1.15e-177	6.79e-176
>ENA|ELU44574|ELU44574.1	hypothetical protein AG1IA_01399	324.922	82.708	3.92855	1.974	1.22e-28	6.04e-28
>ENA|ELU44555|ELU44555.1	hypothetical protein AG1IA_01415	174.957	1198.31	0.146004	-2.77592	6.04e-81	1.01e-79
>ENA|ELU44513|ELU44513.1	hypothetical protein AG1IA_01475	3934.82	26747	0.147113	-2.76501	4.16e-57	4.36e-56
>ENA|ELU44454|ELU44454.1	hypothetical protein AG1IA_01510	4527.59	753.365	6.00982	2.58732	9.88e-20	3.53e-19
>ENA|ELU44456|ELU44456.1	hypothetical protein AG1IA_01512	663.376	151.624	4.37514	2.12933	8.11e-39	5.43e-38
>ENA|ELU44458|ELU44458.1	hypothetical protein AG1IA_01514	149.109	1585.75	0.0940301	-3.41073	1.41e-95	3.19e-94
>ENA|ELU44397|ELU44397.1	hypothetical protein AG1IA_01573	1147.53	300.141	3.82329	1.93481	7.33e-09	1.56e-08
>ENA|ELU44376|ELU44376.1	hypothetical protein AG1IA_01593	3303.29	10542.7	0.313326	-1.67426	3.24e-42	2.39e-41
>ENA|ELU44379|ELU44379.1	hypothetical protein AG1IA_01596	202.052	31.5763	6.39886	2.67781	2.35e-40	1.64e-39
>ENA|ELU44381|ELU44381.1	hypothetical protein AG1IA_01598	140.182	554.331	0.252886	-1.98344	3.81e-37	2.44e-36
>ENA|ELU44365|ELU44365.1	hypothetical protein AG1IA_01603	495.856	2577.88	0.19235	-2.37819	2.62e-73	3.87e-72
>ENA|ELU44366|ELU44366.1	hypothetical protein AG1IA_01604	49.695	915.083	0.0543065	-4.20273	7e-133	2.72e-131
>ENA|ELU44367|ELU44367.1	hypothetical protein AG1IA_01605	664.921	2829.35	0.235008	-2.08922	1.55e-39	1.06e-38
>ENA|ELU44345|ELU44345.1	hypothetical protein AG1IA_01619	541.453	152.078	3.56037	1.83203	2.41e-28	1.18e-27
>ENA|ELU44346|ELU44346.1	hypothetical protein AG1IA_01620	1830.05	517.953	3.53324	1.82099	3.92e-32	2.16e-31
>ENA|ELU44330|ELU44330.1	hypothetical protein AG1IA_01640	611.082	2427.43	0.25174	-1.98999	3.31e-52	3.16e-51
>ENA|ELU44326|ELU44326.1	hypothetical protein AG1IA_01644	1425.37	325.12	4.38415	2.1323	2.58e-50	2.35e-49
>ENA|ELU44320|ELU44320.1	hypothetical protein AG1IA_01651	535.17	105.658	5.06513	2.3406	3.4e-24	1.44e-23
>ENA|ELU44305|ELU44305.1	hypothetical protein AG1IA_01658	247.97	813.394	0.304859	-1.71379	2.5e-23	1.03e-22
>ENA|ELU44307|ELU44307.1	hypothetical protein AG1IA_01660	2312.29	542.857	4.25949	2.09068	6.86e-55	6.92e-54
>ENA|ELU44310|ELU44310.1	hypothetical protein AG1IA_01663	611.389	2039.82	0.299726	-1.73828	2.82e-18	9.58e-18
>ENA|ELU44221|ELU44221.1	hypothetical protein AG1IA_01742	195.585	817.872	0.239138	-2.06408	8.25e-50	7.38e-49
>ENA|ELU44222|ELU44222.1	hypothetical protein AG1IA_01743	1089.84	274.236	3.97411	1.99063	7.76e-42	5.69e-41
>ENA|ELU44216|ELU44216.1	hypothetical protein AG1IA_01754	1559.39	6465.09	0.241202	-2.05169	5.07e-60	5.68e-59
>ENA|ELU44217|ELU44217.1	hypothetical protein AG1IA_01755	1601.66	6243.68	0.256524	-1.96283	1.87e-55	1.9e-54
>ENA|ELU44199|ELU44199.1	hypothetical protein AG1IA_01769	633.242	2082.07	0.304141	-1.71719	1.74e-39	1.18e-38
>ENA|ELU44142|ELU44142.1	hypothetical protein AG1IA_01824	156.983	659.129	0.238167	-2.06995	1.96e-42	1.46e-41
>ENA|ELU44145|ELU44145.1	hypothetical protein AG1IA_01827	2158.76	328.12	6.57917	2.71791	1.06e-44	8.35e-44
>ENA|ELU44136|ELU44136.1	hypothetical protein AG1IA_01836	492.11	3814.17	0.129022	-2.95432	1.94e-109	5.48e-108
>ENA|ELU44128|ELU44128.1	hypothetical protein AG1IA_01843	1558.02	326.359	4.77396	2.25518	3.08e-15	9.22e-15
>ENA|ELU44107|ELU44107.1	hypothetical protein AG1IA_01862	1121.25	6231.01	0.179946	-2.47436	3.11e-35	1.88e-34
>ENA|ELU44028|ELU44028.1	hypothetical protein AG1IA_01944	321.664	1366.06	0.235468	-2.0864	8.16e-09	1.73e-08
>ENA|ELU44030|ELU44030.1	hypothetical protein AG1IA_01946	1292.81	106.6	12.1276	3.60023	1.89e-106	5.05e-105
>ENA|ELU44013|ELU44013.1	hypothetical protein AG1IA_01956	163.89	1008.06	0.162579	-2.62079	2.51e-35	1.52e-34
>ENA|ELU43986|ELU43986.1	hypothetical protein AG1IA_01967	1019.31	139.193	7.32298	2.87243	9.89e-70	1.35e-68
>ENA|ELU43992|ELU43992.1	hypothetical protein AG1IA_01973	651.138	2261.87	0.287875	-1.79648	7.89e-26	3.51e-25
>ENA|ELU43998|ELU43998.1	hypothetical protein AG1IA_01979	79.015	53140.1	0.00148692	-9.39346	0	0
>ENA|ELU43972|ELU43972.1	hypothetical protein AG1IA_02001	406.872	2776.45	0.146544	-2.77059	3.03e-94	6.67e-93
>ENA|ELU43968|ELU43968.1	hypothetical protein AG1IA_02009	5889.45	1194.33	4.93116	2.30193	7.46e-73	1.08e-71
>ENA|ELU43955|ELU43955.1	hypothetical protein AG1IA_02011	132.85	482.441	0.27537	-1.86056	3.47e-05	5.8e-05
>ENA|ELU43919|ELU43919.1	hypothetical protein AG1IA_02045	106.424	367.246	0.28979	-1.78692	1.21e-26	5.56e-26
>ENA|ELU43901|ELU43901.1	hypothetical protein AG1IA_02056	3030.06	783.438	3.86765	1.95146	5.51e-51	5.13e-50
>ENA|ELU43900|ELU43900.1	hypothetical protein AG1IA_02090	100.948	2812.39	0.0358938	-4.80012	1.08e-134	4.4e-133
>ENA|ELU43877|ELU43877.1	hypothetical protein AG1IA_02091	112.126	2943.86	0.038088	-4.71452	1.72e-83	3.02e-82
>ENA|ELU43866|ELU43866.1	hypothetical protein AG1IA_02104	496.904	2269.61	0.218938	-2.19141	1.66e-45	1.34e-44
>ENA|ELU43867|ELU43867.1	hypothetical protein AG1IA_02105	351.519	3792.39	0.0926907	-3.43143	1.56e-131	6.04e-130
>ENA|ELU43844|ELU43844.1	hypothetical protein AG1IA_02106	352.345	4207.71	0.0837378	-3.57798	1.18e-105	3.12e-104
>ENA|ELU43845|ELU43845.1	hypothetical protein AG1IA_02107	858.892	87.8379	9.77814	3.28956	1.43e-23	5.93e-23
>ENA|ELU43857|ELU43857.1	hypothetical protein AG1IA_02119	88.9729	599.817	0.148333	-2.75308	7.13e-63	8.46e-62
>ENA|ELU43820|ELU43820.1	hypothetical protein AG1IA_02137	664.051	2515.99	0.263932	-1.92176	1.55e-45	1.25e-44
>ENA|ELU43821|ELU43821.1	hypothetical protein AG1IA_02138	379.322	1462.55	0.259356	-1.947	1.85e-31	1e-30
>ENA|ELU43836|ELU43836.1	hypothetical protein AG1IA_02153	443.903	72.5574	6.11796	2.61305	3.72e-31	2e-30
>ENA|ELU43808|ELU43808.1	hypothetical protein AG1IA_02155	611.017	2339.03	0.261227	-1.93662	1.48e-14	4.27e-14
>ENA|ELU43754|ELU43754.1	hypothetical protein AG1IA_02215	1801.96	502.736	3.58431	1.84169	9.79e-42	7.15e-41
>ENA|ELU43739|ELU43739.1	hypothetical protein AG1IA_02229	15258.7	1645.81	9.27128	3.21277	6.87e-138	2.9e-136
>ENA|ELU43733|ELU43733.1	hypothetical protein AG1IA_02237	167.126	1096.79	0.152377	-2.71428	2.47e-76	3.84e-75
>ENA|ELU43682|ELU43682.1	hypothetical protein AG1IA_02291	6063	26.1721	231.659	7.85586	3.48e-20	1.27e-19
>ENA|ELU43670|ELU43670.1	hypothetical protein AG1IA_02298	56.25	272.681	0.206285	-2.27729	3.72e-27	1.74e-26
>ENA|ELU43672|ELU43672.1	hypothetical protein AG1IA_02300	251.616	932.932	0.269704	-1.89055	2.87e-40	2.01e-39
>ENA|ELU43654|ELU43654.1	hypothetical protein AG1IA_02340	2586.67	557.055	4.64348	2.21521	2.9e-61	3.32e-60
>ENA|ELU43629|ELU43629.1	hypothetical protein AG1IA_02341	3778.74	769.234	4.91234	2.29641	7.25e-69	9.67e-68
>ENA|ELU43590|ELU43590.1	hypothetical protein AG1IA_02407	145.059	191154	0.000758856	-10.3639	0	0
>ENA|ELU43485|ELU43485.1	hypothetical protein AG1IA_02484	497.43	2076.78	0.23952	-2.06178	1.65e-44	1.29e-43
>ENA|ELU43478|ELU43478.1	hypothetical protein AG1IA_02490	167.961	670.743	0.250411	-1.99763	7.48e-35	4.45e-34
>ENA|ELU43467|ELU43467.1	hypothetical protein AG1IA_02498	88.4088	295.528	0.299155	-1.74103	1.19e-22	4.78e-22
>ENA|ELU43456|ELU43456.1	hypothetical protein AG1IA_02512	223.666	1014.11	0.220555	-2.18079	3.62e-10	8.27e-10
>ENA|ELU43447|ELU43447.1	hypothetical protein AG1IA_02529	150.142	717.532	0.209248	-2.25672	2.63e-50	2.39e-49
>ENA|ELU43254|ELU43254.1	hypothetical protein AG1IA_02714	924.629	2855.3	0.323829	-1.6267	9.77e-06	1.7e-05
>ENA|ELU43239|ELU43239.1	hypothetical protein AG1IA_02744	55.9498	1888.37	0.0296287	-5.07686	1.03e-178	6.21e-177
>ENA|ELU43207|ELU43207.1	hypothetical protein AG1IA_02749	726.832	6256.13	0.116179	-3.10558	1.58e-125	5.56e-124
>ENA|ELU43205|ELU43205.1	hypothetical protein AG1IA_02767	722.895	2199.61	0.328646	-1.60539	6.64e-35	3.95e-34
>ENA|ELU43195|ELU43195.1	hypothetical protein AG1IA_02787	124.987	1241.39	0.100683	-3.3121	1.29e-111	3.79e-110
>ENA|ELU43196|ELU43196.1	hypothetical protein AG1IA_02788	348.591	1150.36	0.303027	-1.72248	3.66e-37	2.35e-36
>ENA|ELU43162|ELU43162.1	hypothetical protein AG1IA_02802	745.823	2510.51	0.297081	-1.75107	2.27e-41	1.64e-40
>ENA|ELU43170|ELU43170.1	hypothetical protein AG1IA_02810	129.487	3116.66	0.0415466	-4.58913	1.48e-215	1.26e-213
>ENA|ELU43108|ELU43108.1	hypothetical protein AG1IA_02869	216.756	1153.03	0.187987	-2.41129	3.66e-66	4.64e-65
>ENA|ELU43056|ELU43056.1	hypothetical protein AG1IA_02910	54.1036	3319.84	0.0162971	-5.93924	8.67e-298	1.82e-295
>ENA|ELU43040|ELU43040.1	hypothetical protein AG1IA_02930	2262.91	13376.5	0.169171	-2.56345	1.13e-16	3.58e-16
>ENA|ELU43036|ELU43036.1	hypothetical protein AG1IA_02934	11.5888	5407.16	0.00214323	-8.866	1.08e-110	3.14e-109
>ENA|ELU43008|ELU43008.1	hypothetical protein AG1IA_02961	187.42	623.663	0.300515	-1.73449	6.25e-31	3.33e-30
>ENA|ELU42912|ELU42912.1	hypothetical protein AG1IA_03058	31.319	634.809	0.0493361	-4.34121	4.2e-127	1.53e-125
>ENA|ELU42902|ELU42902.1	hypothetical protein AG1IA_03066	510.095	66.7776	7.63872	2.93333	3.75e-40	2.6e-39
>ENA|ELU42903|ELU42903.1	hypothetical protein AG1IA_03067	484.747	46.8679	10.3428	3.37056	4.93e-22	1.94e-21
>ENA|ELU42881|ELU42881.1	hypothetical protein AG1IA_03103	13.5881	696.656	0.0195047	-5.68003	2.01e-178	1.21e-176
>ENA|ELU42845|ELU42845.1	hypothetical protein AG1IA_03123	141.059	489.204	0.288345	-1.79413	4.39e-30	2.28e-29
>ENA|ELU42841|ELU42841.1	hypothetical protein AG1IA_03131	3.35555	708.975	0.00473296	-7.72304	1.4e-207	1.15e-205
>ENA|ELU42829|ELU42829.1	hypothetical protein AG1IA_03140	8122.18	1304.7	6.22533	2.63815	1.42e-94	3.15e-93
>ENA|ELU42779|ELU42779.1	hypothetical protein AG1IA_03186	1320.18	94.4415	13.9788	3.80517	7.53e-26	3.35e-25
>ENA|ELU42659|ELU42659.1	hypothetical protein AG1IA_03305	2279.47	16012.7	0.142354	-2.81245	1.52e-76	2.39e-75
>ENA|ELU42608|ELU42608.1	hypothetical protein AG1IA_03362	51.1042	436.935	0.116961	-3.09591	8.33e-67	1.06e-65
>ENA|ELU42601|ELU42601.1	hypothetical protein AG1IA_03363	146.677	1600.39	0.0916508	-3.44771	1.14e-122	3.81e-121
>ENA|ELU42594|ELU42594.1	hypothetical protein AG1IA_03374	651.609	2453.66	0.265567	-1.91285	2.91e-27	1.37e-26
>ENA|ELU42532|ELU42532.1	hypothetical protein AG1IA_03437	96.8463	472.062	0.205156	-2.28521	3.52e-41	2.53e-40
>ENA|ELU42461|ELU42461.1	hypothetical protein AG1IA_03481	7738.47	454.286	17.0343	4.09037	2.05e-81	3.47e-80
>ENA|ELU42415|ELU42415.1	hypothetical protein AG1IA_03546	569.675	64.8637	8.78264	3.13466	5.26e-62	6.14e-61
>ENA|ELU42416|ELU42416.1	hypothetical protein AG1IA_03547	842.611	105.601	7.9792	2.99624	1.12e-69	1.53e-68
>ENA|ELU42405|ELU42405.1	hypothetical protein AG1IA_03579	273.738	1131.7	0.241881	-2.04763	3.1e-21	1.18e-20
>ENA|ELU42243|ELU42243.1	hypothetical protein AG1IA_03728	120.637	406.318	0.296902	-1.75194	4.49e-15	1.33e-14
>ENA|ELU42216|ELU42216.1	hypothetical protein AG1IA_03752	153.717	496.072	0.309868	-1.69028	3.04e-11	7.39e-11
>ENA|ELU42217|ELU42217.1	hypothetical protein AG1IA_03753	85.5985	760.259	0.112591	-3.15083	3.85e-28	1.87e-27
>ENA|ELU42218|ELU42218.1	hypothetical protein AG1IA_03754	1986.61	8266.2	0.240329	-2.05691	1.09e-60	1.24e-59
>ENA|ELU42203|ELU42203.1	hypothetical protein AG1IA_03768	68.1586	296.421	0.229939	-2.12068	1.09e-32	6.15e-32
>ENA|ELU42193|ELU42193.1	hypothetical protein AG1IA_03777	443.447	97.3519	4.55509	2.18748	2.13e-34	1.25e-33
>ENA|ELU42192|ELU42192.1	hypothetical protein AG1IA_03779	146.184	2031.3	0.0719653	-3.79655	2.11e-150	1e-148
>ENA|ELU42178|ELU42178.1	hypothetical protein AG1IA_03790	984.875	55.1483	17.8587	4.15855	1.72e-128	6.41e-127
>ENA|ELU42171|ELU42171.1	hypothetical protein AG1IA_03794	1496.36	14028.3	0.106667	-3.22881	7.64e-138	3.21e-136
>ENA|ELU42166|ELU42166.1	hypothetical protein AG1IA_03813	627.801	12970.9	0.0484008	-4.36883	4.09e-213	3.44e-211
>ENA|ELU42122|ELU42122.1	hypothetical protein AG1IA_03855	251.777	1654.21	0.152204	-2.71592	4.05e-86	7.58e-85
>ENA|ELU42096|ELU42096.1	hypothetical protein AG1IA_03874	149.982	3968.39	0.0377942	-4.72569	2.73e-81	4.59e-80
>ENA|ELU42067|ELU42067.1	hypothetical protein AG1IA_03890	5.13279	2570.93	0.00199648	-8.96833	0	0
>ENA|ELU42069|ELU42069.1	hypothetical protein AG1IA_03892	107.957	2930.23	0.0368424	-4.76249	6.62e-37	4.19e-36
>ENA|ELU42073|ELU42073.1	hypothetical protein AG1IA_03896	1281.14	39.5714	32.3755	5.01683	1.74e-164	9.05e-163
>ENA|ELU42016|ELU42016.1	hypothetical protein AG1IA_03955	1721.19	379.543	4.5349	2.18107	1.57e-24	6.73e-24
>ENA|ELU42017|ELU42017.1	hypothetical protein AG1IA_03956	447.249	64.9065	6.89067	2.78464	5.84e-36	3.59e-35
>ENA|ELU42018|ELU42018.1	hypothetical protein AG1IA_03957	797.12	148.668	5.36175	2.4227	1.14e-52	1.1e-51
>ENA|ELU41978|ELU41978.1	hypothetical protein AG1IA_03992	44.8839	523.195	0.085788	-3.54308	1.6e-50	1.47e-49
>ENA|ELU41979|ELU41979.1	hypothetical protein AG1IA_03993	63.1921	4179.13	0.0151209	-6.04731	0	0
>ENA|ELU41941|ELU41941.1	hypothetical protein AG1IA_04024	1023.56	6608.63	0.154882	-2.69076	1.02e-56	1.06e-55
>ENA|ELU41931|ELU41931.1	hypothetical protein AG1IA_04035	1716.11	377.089	4.55093	2.18616	1.86e-21	7.16e-21
>ENA|ELU41929|ELU41929.1	hypothetical protein AG1IA_04054	298.694	1453.81	0.205455	-2.2831	5.18e-12	1.31e-11
>ENA|ELU41855|ELU41855.1	hypothetical protein AG1IA_04106	38.4972	321.074	0.119901	-3.06008	4.6e-59	5.01e-58
>ENA|ELU41856|ELU41856.1	hypothetical protein AG1IA_04107	45.9166	402.864	0.113975	-3.13321	4.74e-67	6.08e-66
>ENA|ELU41863|ELU41863.1	hypothetical protein AG1IA_04114	448.051	1568.28	0.285695	-1.80745	5.07e-18	1.71e-17
>ENA|ELU41824|ELU41824.1	hypothetical protein AG1IA_04144	741.971	2963.55	0.250366	-1.99789	5.41e-17	1.74e-16
>ENA|ELU41806|ELU41806.1	hypothetical protein AG1IA_04170	365.717	57.5774	6.35175	2.66715	1.19e-39	8.18e-39
>ENA|ELU41798|ELU41798.1	hypothetical protein AG1IA_04173	298.073	1003.21	0.297118	-1.75089	4.54e-36	2.8e-35
>ENA|ELU41725|ELU41725.1	hypothetical protein AG1IA_04255	402.26	76.3009	5.27202	2.39836	1.65e-34	9.72e-34
>ENA|ELU41706|ELU41706.1	hypothetical protein AG1IA_04268	445.207	1460.4	0.304853	-1.71382	0.00010749	0.000174511
>ENA|ELU41687|ELU41687.1	hypothetical protein AG1IA_04279	12492.7	2551.67	4.89589	2.29157	8.45e-40	5.82e-39
>ENA|ELU41661|ELU41661.1	hypothetical protein AG1IA_04322	553.375	160.988	3.43736	1.7813	2.42e-27	1.14e-26
>ENA|ELU41663|ELU41663.1	hypothetical protein AG1IA_04324	43.5624	779.545	0.0558818	-4.16148	3.73e-125	1.3e-123
>ENA|ELU41644|ELU41644.1	hypothetical protein AG1IA_04330	305.644	1006.49	0.303672	-1.71941	1.41e-34	8.34e-34
>ENA|ELU41622|ELU41622.1	hypothetical protein AG1IA_04342	1675.88	401.687	4.1721	2.06077	5.63e-49	4.94e-48
>ENA|ELU41609|ELU41609.1	hypothetical protein AG1IA_04356	124.889	618.1	0.202054	-2.30719	1.18e-10	2.75e-10
>ENA|ELU41575|ELU41575.1	hypothetical protein AG1IA_04386	317.193	104.891	3.02404	1.59648	2.05e-17	6.71e-17
>ENA|ELU41584|ELU41584.1	hypothetical protein AG1IA_04395	285.815	1691.25	0.168996	-2.56494	5.73e-19	1.99e-18
>ENA|ELU41569|ELU41569.1	hypothetical protein AG1IA_04398	84.3146	341.899	0.246607	-2.01972	5.46e-08	1.11e-07
>ENA|ELU41571|ELU41571.1	hypothetical protein AG1IA_04400	751.753	66.3526	11.3297	3.50203	3.47e-82	5.96e-81
>ENA|ELU41565|ELU41565.1	hypothetical protein AG1IA_04415	685.596	5839.86	0.117399	-3.0905	4.34e-121	1.42e-119
>ENA|ELU41520|ELU41520.1	hypothetical protein AG1IA_04454	225.774	1255.32	0.179853	-2.47511	6.35e-43	4.78e-42
>ENA|ELU41442|ELU41442.1	hypothetical protein AG1IA_04533	174.127	1629.88	0.106834	-3.22655	3.18e-109	8.94e-108
>ENA|ELU41418|ELU41418.1	hypothetical protein AG1IA_04553	345.058	37.7172	9.14856	3.19354	5.03e-50	4.53e-49
>ENA|ELU41382|ELU41382.1	hypothetical protein AG1IA_04590	452.809	74.9526	6.04127	2.59485	4.44e-40	3.07e-39
>ENA|ELU41383|ELU41383.1	hypothetical protein AG1IA_04591	129.32	445.302	0.290409	-1.78384	3.1e-20	1.13e-19
>ENA|ELU41314|ELU41314.1	hypothetical protein AG1IA_04649	58.431	208.939	0.279655	-1.83828	7.09e-17	2.27e-16
>ENA|ELU41265|ELU41265.1	hypothetical protein AG1IA_04704	1427.37	93.0471	15.3403	3.93925	4.33e-39	2.92e-38
>ENA|ELU41266|ELU41266.1	hypothetical protein AG1IA_04705	892.016	39.2069	22.7515	4.50789	1.06e-59	1.18e-58
>ENA|ELU41251|ELU41251.1	hypothetical protein AG1IA_04719	1258.33	361.121	3.48451	1.80096	2.15e-14	6.14e-14
>ENA|ELU41241|ELU41241.1	hypothetical protein AG1IA_04729	1796.84	6794.87	0.26444	-1.91899	1.87e-53	1.83e-52
>ENA|ELU41205|ELU41205.1	hypothetical protein AG1IA_04762	89.192	680.614	0.131046	-2.93185	2.78e-73	4.09e-72
>ENA|ELU41208|ELU41208.1	hypothetical protein AG1IA_04765	782.651	113.943	6.86879	2.78006	3.46e-10	7.92e-10
>ENA|ELU41211|ELU41211.1	hypothetical protein AG1IA_04768	2.52311	1161.69	0.00217192	-8.84681	2.78e-272	4.73e-270
>ENA|ELU41195|ELU41195.1	hypothetical protein AG1IA_04775	16413.1	3054.73	5.373	2.42573	4.8e-85	8.63e-84
>ENA|ELU41178|ELU41178.1	hypothetical protein AG1IA_04792	929.288	4080.4	0.227744	-2.13451	4.72e-06	8.39e-06
>ENA|ELU41112|ELU41112.1	hypothetical protein AG1IA_04858	2843.22	501.081	5.67417	2.50441	5.98e-61	6.81e-60
>ENA|ELU41100|ELU41100.1	hypothetical protein AG1IA_04863	593.706	21.6128	27.4701	4.77979	5.21e-69	6.99e-68
>ENA|ELU41101|ELU41101.1	hypothetical protein AG1IA_04864	9.04372	784.365	0.01153	-6.43846	7.68e-193	5.38e-191
>ENA|ELU41091|ELU41091.1	hypothetical protein AG1IA_04872	57.9177	444.907	0.130179	-2.94143	1e-26	4.63e-26
>ENA|ELU41098|ELU41098.1	hypothetical protein AG1IA_04879	96.558	374.34	0.257942	-1.95488	3.1e-06	5.57e-06
>ENA|ELU41070|ELU41070.1	hypothetical protein AG1IA_04900	1223.11	192.208	6.36346	2.66981	3.08e-14	8.75e-14
>ENA|ELU41054|ELU41054.1	hypothetical protein AG1IA_04916	2782.15	9406.96	0.295755	-1.75753	3.13e-35	1.89e-34
>ENA|ELU41045|ELU41045.1	hypothetical protein AG1IA_04925	1187.4	196.604	6.03954	2.59444	1.23e-64	1.52e-63
>ENA|ELU41024|ELU41024.1	hypothetical protein AG1IA_04958	109.811	610.753	0.179796	-2.47556	1.55e-53	1.52e-52
>ENA|ELU41003|ELU41003.1	hypothetical protein AG1IA_04971	565.837	2166.95	0.261122	-1.93721	8.3e-49	7.28e-48
>ENA|ELU40994|ELU40994.1	hypothetical protein AG1IA_04976	157.814	497.45	0.317246	-1.65633	4.08e-14	1.15e-13
>ENA|ELU40973|ELU40973.1	hypothetical protein AG1IA_04997	301.865	1527.26	0.197651	-2.33897	2.54e-64	3.12e-63
>ENA|ELU40972|ELU40972.1	hypothetical protein AG1IA_05002	3.494	215.16	0.0162391	-5.94439	4.52e-96	1.04e-94
>ENA|ELU40880|ELU40880.1	hypothetical protein AG1IA_05088	838.334	6323.51	0.132574	-2.91513	1.09e-111	3.22e-110
>ENA|ELU40869|ELU40869.1	hypothetical protein AG1IA_05103	436.649	2110.81	0.206863	-2.27325	1.6e-64	1.97e-63
>ENA|ELU40870|ELU40870.1	hypothetical protein AG1IA_05104	79.548	413.33	0.192456	-2.3774	2.78e-20	1.02e-19
>ENA|ELU40721|ELU40721.1	hypothetical protein AG1IA_05249	383.047	1166.65	0.328332	-1.60677	4.39e-27	2.05e-26
>ENA|ELU40716|ELU40716.1	hypothetical protein AG1IA_05252	2310.95	493.803	4.67991	2.22648	1.17e-13	3.21e-13
>ENA|ELU40709|ELU40709.1	hypothetical protein AG1IA_05257	2040.66	7126.17	0.286361	-1.80409	1.12e-47	9.56e-47
>ENA|ELU40705|ELU40705.1	hypothetical protein AG1IA_05273	916.047	5439.11	0.168419	-2.56988	1.72e-42	1.28e-41
>ENA|ELU40675|ELU40675.1	hypothetical protein AG1IA_05291	1669.12	423.399	3.9422	1.979	6.84e-25	2.96e-24
>ENA|ELU40663|ELU40663.1	hypothetical protein AG1IA_05312	637.984	196.039	3.25437	1.70238	1.44e-27	6.86e-27
>ENA|ELU40637|ELU40637.1	hypothetical protein AG1IA_05330	362.497	5796.7	0.0625351	-3.99919	8.71e-87	1.66e-85
>ENA|ELU40638|ELU40638.1	hypothetical protein AG1IA_05331	3903.55	22942.7	0.170144	-2.55518	7.24e-86	1.34e-84
>ENA|ELU40586|ELU40586.1	hypothetical protein AG1IA_05390	1479.18	5402.5	0.273796	-1.86882	3.24e-50	2.94e-49
>ENA|ELU40571|ELU40571.1	hypothetical protein AG1IA_05397	6058.94	535.465	11.3153	3.5002	4.06e-129	1.52e-127
>ENA|ELU40523|ELU40523.1	hypothetical protein AG1IA_05455	195.874	1266.37	0.154674	-2.6927	1.41e-82	2.44e-81
>ENA|ELU40507|ELU40507.1	hypothetical protein AG1IA_05467	2168.76	634.625	3.41738	1.77289	2.01e-39	1.36e-38
>ENA|ELU40489|ELU40489.1	hypothetical protein AG1IA_05476	1028.1	196.926	5.22074	2.38425	8.23e-59	8.92e-58
>ENA|ELU40461|ELU40461.1	hypothetical protein AG1IA_05500	1965.11	6947.83	0.282838	-1.82195	2.06e-48	1.79e-47
>ENA|ELU40382|ELU40382.1	hypothetical protein AG1IA_05572	2338.79	729.581	3.20566	1.68062	6.99e-20	2.51e-19
>ENA|ELU40336|ELU40336.1	hypothetical protein AG1IA_05630	6.24213	101.352	0.0615884	-4.0212	6.52e-48	5.61e-47
>ENA|ELU40333|ELU40333.1	hypothetical protein AG1IA_05639	175.796	627.665	0.280079	-1.83609	7.02e-20	2.52e-19
>ENA|ELU40312|ELU40312.1	hypothetical protein AG1IA_05640	169.414	610.274	0.277603	-1.84891	6.7e-32	3.68e-31
>ENA|ELU40283|ELU40283.1	hypothetical protein AG1IA_05672	900.469	235.91	3.81701	1.93244	2.89e-37	1.86e-36
>ENA|ELU40287|ELU40287.1	hypothetical protein AG1IA_05676	6358.04	1267.08	5.01786	2.32707	2.29e-16	7.17e-16
>ENA|ELU40301|ELU40301.1	hypothetical protein AG1IA_05690	472.499	5461.04	0.0865217	-3.53079	3.09e-42	2.28e-41
>ENA|ELU40277|ELU40277.1	hypothetical protein AG1IA_05692	229.578	1982.49	0.115803	-3.11025	3.76e-73	5.52e-72
>ENA|ELU40260|ELU40260.1	hypothetical protein AG1IA_05710	141.214	440.97	0.320234	-1.6428	2.3e-24	9.83e-24
>ENA|ELU40259|ELU40259.1	hypothetical protein AG1IA_05711	185.034	606.048	0.305313	-1.71164	1.03e-22	4.16e-22
>ENA|ELU40256|ELU40256.1	hypothetical protein AG1IA_05712	487.7	1877.62	0.259743	-1.94484	3.44e-45	2.75e-44
>ENA|ELU40240|ELU40240.1	hypothetical protein AG1IA_05736	678.306	174.412	3.88911	1.95944	1.23e-35	7.52e-35
>ENA|ELU40241|ELU40241.1	hypothetical protein AG1IA_05737	252.993	937.806	0.269771	-1.89019	1.24e-09	2.75e-09
>ENA|ELU40223|ELU40223.1	hypothetical protein AG1IA_05742	2455.75	271.015	9.06132	3.17972	4.22e-24	1.79e-23
>ENA|ELU40202|ELU40202.1	hypothetical protein AG1IA_05749	277.838	1263.77	0.219849	-2.18542	6.6e-58	7.04e-57
>ENA|ELU40199|ELU40199.1	hypothetical protein AG1IA_05776	1280.03	239.522	5.34411	2.41795	5.07e-39	3.41e-38
>ENA|ELU40191|ELU40191.1	hypothetical protein AG1IA_05788	220.897	834.235	0.26479	-1.91708	2.41e-05	4.08e-05
>ENA|ELU40192|ELU40192.1	hypothetical protein AG1IA_05789	658.486	2281.95	0.288563	-1.79304	8.38e-12	2.1e-11
>ENA|ELU40175|ELU40175.1	hypothetical protein AG1IA_05802	5278.13	623.245	8.46877	3.08215	5.51e-44	4.25e-43
>ENA|ELU40113|ELU40113.1	hypothetical protein AG1IA_05859	110.897	2827.46	0.0392215	-4.67221	7.39e-219	6.65e-217
>ENA|ELU40094|ELU40094.1	hypothetical protein AG1IA_05870	692.551	2116.51	0.327214	-1.61169	3.77e-35	2.26e-34
>ENA|ELU40080|ELU40080.1	hypothetical protein AG1IA_05880	557.357	30.8202	18.0841	4.17665	4.69e-91	9.59e-90
>ENA|ELU40081|ELU40081.1	hypothetical protein AG1IA_05881	145.396	1060.85	0.137057	-2.86716	2.46e-62	2.89e-61
>ENA|ELU40076|ELU40076.1	hypothetical protein AG1IA_05909	412.801	1293.25	0.319196	-1.64749	2.35e-07	4.56e-07
>ENA|ELU40048|ELU40048.1	hypothetical protein AG1IA_05913	728.068	87.4595	8.32463	3.05739	1.75e-35	1.07e-34
>ENA|ELU40026|ELU40026.1	hypothetical protein AG1IA_05938	690.213	3882.55	0.177773	-2.49189	1.48e-82	2.56e-81
>ENA|ELU40018|ELU40018.1	hypothetical protein AG1IA_05952	4.6712	1072.91	0.00435378	-7.84352	1.38e-258	2.23e-256
>ENA|ELU39989|ELU39989.1	hypothetical protein AG1IA_05972	850.08	227.763	3.7323	1.90007	2.95e-29	1.49e-28
>ENA|ELU39969|ELU39969.1	hypothetical protein AG1IA_06000	210.697	1498.01	0.140652	-2.8298	1.53e-66	1.94e-65
>ENA|ELU39968|ELU39968.1	hypothetical protein AG1IA_06003	154.628	1361.32	0.113587	-3.13813	6.17e-43	4.65e-42
>ENA|ELU39936|ELU39936.1	Hypothetical protein AG1IA_06038	7157.9	24147.9	0.296419	-1.75429	3.61e-38	2.37e-37
>ENA|ELU39912|ELU39912.1	hypothetical protein AG1IA_06057	226.507	1308.5	0.173103	-2.53029	9.1e-71	1.26e-69
>ENA|ELU39885|ELU39885.1	hypothetical protein AG1IA_06085	376.391	1340.3	0.280827	-1.83225	1.09e-36	6.88e-36
>ENA|ELU39886|ELU39886.1	hypothetical protein AG1IA_06086	608.093	2522.92	0.241027	-2.05273	2.01e-33	1.15e-32
>ENA|ELU39865|ELU39865.1	hypothetical protein AG1IA_06087	493.124	2469.91	0.199653	-2.32443	6.33e-67	8.1e-66
>ENA|ELU39727|ELU39727.1	hypothetical protein AG1IA_06244	573.235	89.704	6.3903	2.67588	2.74e-36	1.7e-35
>ENA|ELU39699|ELU39699.1	hypothetical protein AG1IA_06271	264.756	85.0317	3.11361	1.63859	6.99e-16	2.15e-15
>ENA|ELU39700|ELU39700.1	hypothetical protein AG1IA_06272	540.297	176.421	3.06254	1.61473	9.7e-09	2.05e-08
>ENA|ELU39690|ELU39690.1	hypothetical protein AG1IA_06282	908.09	52.7256	17.2229	4.10626	1.16e-104	3e-103
>ENA|ELU39582|ELU39582.1	hypothetical protein AG1IA_06389	431.806	31.7838	13.5858	3.76402	5.97e-45	4.73e-44
>ENA|ELU39565|ELU39565.1	hypothetical protein AG1IA_06400	1112.68	283.17	3.92935	1.97429	1.7e-40	1.2e-39
>ENA|ELU39548|ELU39548.1	hypothetical protein AG1IA_06423	436.718	1667.45	0.261908	-1.93287	2.52e-49	2.23e-48
>ENA|ELU39527|ELU39527.1	hypothetical protein AG1IA_06443	418.053	2065.37	0.202411	-2.30464	5.92e-66	7.47e-65
>ENA|ELU39495|ELU39495.1	hypothetical protein AG1IA_06475	70.3041	412.507	0.170431	-2.55274	9.33e-48	8.03e-47
>ENA|ELU39494|ELU39494.1	hypothetical protein AG1IA_06476	441.859	4283.33	0.103158	-3.27707	4.1e-133	1.61e-131
>ENA|ELU39492|ELU39492.1	hypothetical protein AG1IA_06479	428.185	1564.32	0.27372	-1.86923	1.51e-42	1.13e-41
>ENA|ELU39456|ELU39456.1	hypothetical protein AG1IA_06515	114.339	453.845	0.251935	-1.98888	1.86e-36	1.16e-35
>ENA|ELU39411|ELU39411.1	hypothetical protein AG1IA_06548	141.795	536.466	0.264313	-1.91968	5.89e-34	3.41e-33
>ENA|ELU39415|ELU39415.1	hypothetical protein AG1IA_06552	435.466	124.744	3.49086	1.80358	6.82e-12	1.71e-11
>ENA|ELU39401|ELU39401.1	hypothetical protein AG1IA_06568	264.044	1083.6	0.243672	-2.03699	6.13e-07	1.16e-06
>ENA|ELU39368|ELU39368.1	hypothetical protein AG1IA_06601	147.884	488.437	0.302771	-1.7237	2.64e-27	1.25e-26
>ENA|ELU39343|ELU39343.1	hypothetical protein AG1IA_06628	210.858	7416.38	0.0284314	-5.13637	2.88e-110	8.29e-109
>ENA|ELU39321|ELU39321.1	hypothetical protein AG1IA_06646	403.822	2016.29	0.20028	-2.31991	8.31e-67	1.06e-65
>ENA|ELU39272|ELU39272.1	hypothetical protein AG1IA_06700	734.059	212.179	3.45962	1.79061	1.77e-30	9.28e-30
>ENA|ELU39213|ELU39213.1	hypothetical protein AG1IA_06757	112.811	728.189	0.154919	-2.69041	5.68e-63	6.76e-62
>ENA|ELU39160|ELU39160.1	hypothetical protein AG1IA_06804	1486.13	260.554	5.70373	2.51191	3.8e-37	2.43e-36
>ENA|ELU39148|ELU39148.1	hypothetical protein AG1IA_06814	863.638	182.319	4.73697	2.24396	5.59e-46	4.62e-45
>ENA|ELU39117|ELU39117.1	hypothetical protein AG1IA_06852	169.942	1069.44	0.158907	-2.65374	4.99e-75	7.61e-74
>ENA|ELU39067|ELU39067.1	hypothetical protein AG1IA_06902	60.334	382.638	0.157679	-2.66494	1.24e-52	1.2e-51
>ENA|ELU39044|ELU39044.1	hypothetical protein AG1IA_06925	435.821	20.1434	21.6359	4.43536	1.72e-86	3.26e-85
>ENA|ELU39017|ELU39017.1	hypothetical protein AG1IA_06938	709.034	2157.96	0.328567	-1.60574	4.67e-35	2.8e-34
>ENA|ELU38958|ELU38958.1	hypothetical protein AG1IA_07008	137.327	1595.11	0.0860928	-3.53796	1.1e-111	3.24e-110
>ENA|ELU38946|ELU38946.1	hypothetical protein AG1IA_07027	1505.52	311.473	4.83355	2.27308	7.25e-55	7.3e-54
>ENA|ELU38927|ELU38927.1	hypothetical protein AG1IA_07045	11.3159	881.125	0.0128425	-6.28293	5.17e-59	5.61e-58
>ENA|ELU38902|ELU38902.1	hypothetical protein AG1IA_07069	896.213	205.038	4.37096	2.12795	2.8e-45	2.24e-44
>ENA|ELU38805|ELU38805.1	hypothetical protein AG1IA_07165	573.731	131.855	4.35122	2.12142	1.3e-36	8.16e-36
>ENA|ELU38799|ELU38799.1	hypothetical protein AG1IA_07172	62.5444	642.726	0.0973112	-3.36125	1.59e-85	2.88e-84
>ENA|ELU38792|ELU38792.1	hypothetical protein AG1IA_07175	414.767	120.632	3.43829	1.78169	2.74e-11	6.68e-11
>ENA|ELU38795|ELU38795.1	hypothetical protein AG1IA_07178	1185.49	5969.39	0.198595	-2.3321	1.53e-48	1.34e-47
>ENA|ELU38783|ELU38783.1	hypothetical protein AG1IA_07179	1692.88	9034.6	0.187378	-2.41598	1.03e-81	1.75e-80
>ENA|ELU38791|ELU38791.1	hypothetical protein AG1IA_07187	1200.62	298.28	4.02514	2.00904	1.72e-41	1.25e-40
>ENA|ELU38579|ELU38579.1	hypothetical protein AG1IA_07393	2615.23	8390.07	0.311706	-1.68174	5.11e-09	1.1e-08
>ENA|ELU38580|ELU38580.1	hypothetical protein AG1IA_07394	2388.74	786.898	3.03565	1.602	1.5e-34	8.82e-34
>ENA|ELU38527|ELU38527.1	hypothetical protein AG1IA_07434	99.1633	325.422	0.304722	-1.71443	5.49e-17	1.77e-16
>ENA|ELU38503|ELU38503.1	hypothetical protein AG1IA_07468	385.073	67.1066	5.73823	2.52061	5.01e-27	2.34e-26
>ENA|ELU38490|ELU38490.1	hypothetical protein AG1IA_07477	3065.32	22502.3	0.136222	-2.87597	2.22e-59	2.44e-58
>ENA|ELU38500|ELU38500.1	hypothetical protein AG1IA_07487	182.878	3449.13	0.0530214	-4.23728	2.86e-194	2.02e-192
>ENA|ELU38449|ELU38449.1	hypothetical protein AG1IA_07519	12741.3	1501.62	8.48508	3.08493	7.46e-17	2.39e-16
>ENA|ELU38451|ELU38451.1	hypothetical protein AG1IA_07521	607.654	2317.41	0.262212	-1.93119	1.9e-40	1.34e-39
>ENA|ELU38419|ELU38419.1	hypothetical protein AG1IA_07551	289.83	982.372	0.29503	-1.76106	5.69e-36	3.5e-35
>ENA|ELU38409|ELU38409.1	hypothetical protein AG1IA_07559	246.603	777.078	0.317347	-1.65587	1.6e-29	8.12e-29
>ENA|ELU38399|ELU38399.1	hypothetical protein AG1IA_07568	147.269	14123.4	0.0104273	-6.58349	2.34e-59	2.57e-58
>ENA|ELU38407|ELU38407.1	hypothetical protein AG1IA_07576	96.0876	3969.03	0.0242093	-5.36829	3.49e-161	1.8e-159
>ENA|ELU38408|ELU38408.1	hypothetical protein AG1IA_07577	111.431	1144.32	0.0973776	-3.36027	9.23e-50	8.24e-49
>ENA|ELU38388|ELU38388.1	hypothetical protein AG1IA_07604	112.82	550.814	0.204825	-2.28754	1.63e-45	1.32e-44
>ENA|ELU38250|ELU38250.1	hypothetical protein AG1IA_07711	65.6804	503.052	0.130564	-2.93717	1.12e-61	1.3e-60
>ENA|ELU38266|ELU38266.1	hypothetical protein AG1IA_07727	79.4616	731.328	0.108654	-3.20219	1.65e-87	3.19e-86
>ENA|ELU38232|ELU38232.1	hypothetical protein AG1IA_07741	149.174	4255.72	0.0350527	-4.83433	5.43e-238	6.33e-236
>ENA|ELU38176|ELU38176.1	hypothetical protein AG1IA_07789	334.84	103.491	3.23544	1.69396	4.76e-20	1.73e-19
>ENA|ELU38154|ELU38154.1	hypothetical protein AG1IA_07819	409.602	1949.9	0.210063	-2.25111	7.76e-38	5.07e-37
>ENA|ELU38159|ELU38159.1	hypothetical protein AG1IA_07824	18701.6	1498.47	12.4805	3.6416	5.73e-173	3.22e-171
>ENA|ELU38131|ELU38131.1	hypothetical protein AG1IA_07840	96.4856	3325.92	0.0290102	-5.1073	4.53e-252	6.34e-250
>ENA|ELU38108|ELU38108.1	hypothetical protein AG1IA_07863	485.489	76.2471	6.36731	2.67068	5.99e-52	5.68e-51
>ENA|ELU38058|ELU38058.1	hypothetical protein AG1IA_07895	223.725	46703.5	0.00479032	-7.70566	0	0
>ENA|ELU38051|ELU38051.1	hypothetical protein AG1IA_07914	88.4116	325.17	0.271894	-1.87889	3.37e-17	1.09e-16
>ENA|ELU38046|ELU38046.1	hypothetical protein AG1IA_07925	562.572	95.916	5.86526	2.55219	6.87e-52	6.5e-51
>ENA|ELU38040|ELU38040.1	hypothetical protein AG1IA_07931	0	10.5291	0	-INF	7.31e-11	1.74e-10
>ENA|ELU38031|ELU38031.1	hypothetical protein AG1IA_07937	30.8417	2871.86	0.0107393	-6.54096	0	0
>ENA|ELU37975|ELU37975.1	hypothetical protein AG1IA_07993	688.982	186.824	3.68787	1.88279	2.19e-20	8.07e-20
>ENA|ELU37968|ELU37968.1	hypothetical protein AG1IA_08002	584.032	3086.91	0.189196	-2.40205	1.34e-27	6.41e-27
>ENA|ELU37964|ELU37964.1	hypothetical protein AG1IA_08011	321.147	1010.33	0.317862	-1.65353	2.84e-33	1.62e-32
>ENA|ELU37952|ELU37952.1	hypothetical protein AG1IA_08018	198.169	638.511	0.310361	-1.68798	1.38e-28	6.83e-28
>ENA|ELU37950|ELU37950.1	hypothetical protein AG1IA_08025	1643.8	180.543	9.10478	3.18662	8.27e-98	1.96e-96
>ENA|ELU37896|ELU37896.1	hypothetical protein AG1IA_08074	65.2075	2240.09	0.0291093	-5.10237	4.35e-229	4.42e-227
>ENA|ELU37882|ELU37882.1	hypothetical protein AG1IA_08075	88.7964	435.048	0.204107	-2.2926	2.53e-42	1.88e-41
>ENA|ELU37771|ELU37771.1	hypothetical protein AG1IA_08192	2128.2	596.236	3.56939	1.83568	1.08e-43	8.29e-43
>ENA|ELU37752|ELU37752.1	hypothetical protein AG1IA_08210	681.355	12983.5	0.0524785	-4.25213	9.53e-217	8.34e-215
>ENA|ELU37735|ELU37735.1	hypothetical protein AG1IA_08225	562.601	3688.97	0.152509	-2.71304	4.59e-94	1e-92
>ENA|ELU37745|ELU37745.1	hypothetical protein AG1IA_08235	521.136	99.3327	5.24637	2.39132	3.65e-21	1.39e-20
>ENA|ELU37720|ELU37720.1	hypothetical protein AG1IA_08257	190.829	618.945	0.308313	-1.69753	3.22e-10	7.37e-10
>ENA|ELU37700|ELU37700.1	hypothetical protein AG1IA_08272	485.198	70.5423	6.87812	2.78201	2.65e-46	2.21e-45
>ENA|ELU37684|ELU37684.1	hypothetical protein AG1IA_08283	2155.11	373.493	5.77017	2.52861	1.91e-19	6.74e-19
>ENA|ELU37669|ELU37669.1	hypothetical protein AG1IA_08301	838.027	157.47	5.32183	2.41192	3.28e-52	3.13e-51
>ENA|ELU37667|ELU37667.1	hypothetical protein AG1IA_08304	58.7054	1770.16	0.0331639	-4.91424	4.28e-33	2.43e-32
>ENA|ELU37629|ELU37629.1	hypothetical protein AG1IA_08341	497.115	116.064	4.28312	2.09866	3.52e-06	6.3e-06
>ENA|ELU37611|ELU37611.1	hypothetical protein AG1IA_08361	1875.77	167.741	11.1826	3.48318	1.57e-126	5.63e-125
>ENA|ELU37613|ELU37613.1	hypothetical protein AG1IA_08363	58.6925	449.508	0.13057	-2.9371	9.21e-47	7.77e-46
>ENA|ELU37531|ELU37531.1	hypothetical protein AG1IA_08441	110.564	416.481	0.265471	-1.91337	3.75e-06	6.7e-06
>ENA|ELU37532|ELU37532.1	hypothetical protein AG1IA_08442	1560.54	357.073	4.37037	2.12776	2.06e-33	1.18e-32
>ENA|ELU37521|ELU37521.1	hypothetical protein AG1IA_08452	95.3377	3014.89	0.0316223	-4.98292	6.93e-95	1.55e-93
>ENA|ELU37516|ELU37516.1	hypothetical protein AG1IA_08465	4243.42	1404.14	3.02208	1.59554	6.53e-37	4.13e-36
>ENA|ELU37392|ELU37392.1	hypothetical protein AG1IA_08578	12723.1	4152.11	3.06425	1.61553	1.67e-26	7.66e-26
>ENA|ELU37378|ELU37378.1	hypothetical protein AG1IA_08593	1322.67	337.95	3.91381	1.96857	2.48e-43	1.88e-42
>ENA|ELU37357|ELU37357.1	hypothetical protein AG1IA_08620	314.182	48.126	6.52832	2.70671	2.07e-39	1.4e-38
>ENA|ELU37337|ELU37337.1	hypothetical protein AG1IA_08634	1915.54	26231.2	0.0730253	-3.77546	2.5e-141	1.09e-139
>ENA|ELU37335|ELU37335.1	hypothetical protein AG1IA_08635	685.348	6238.62	0.109856	-3.18632	5.44e-62	6.33e-61
>ENA|ELU37272|ELU37272.1	hypothetical protein AG1IA_08697	1196.33	327.943	3.64798	1.8671	4.63e-40	3.2e-39
>ENA|ELU37239|ELU37239.1	hypothetical protein AG1IA_08734	64.0169	205.453	0.311589	-1.68228	3.34e-20	1.22e-19
>ENA|ELU37221|ELU37221.1	hypothetical protein AG1IA_08756	117.199	844.23	0.138823	-2.84868	7.45e-09	1.58e-08
>ENA|ELU37137|ELU37137.1	hypothetical protein AG1IA_08824	302.493	176492	0.00171392	-9.18849	2.25e-242	2.84e-240
>ENA|ELU37130|ELU37130.1	hypothetical protein AG1IA_08841	458.356	127.927	3.58296	1.84115	5.82e-26	2.61e-25
>ENA|ELU37114|ELU37114.1	hypothetical protein AG1IA_08859	2970.51	8930.39	0.332629	-1.58801	1.04e-38	6.94e-38
>ENA|ELU37093|ELU37093.1	hypothetical protein AG1IA_08879	48.3432	337.431	0.143268	-2.80321	3.07e-37	1.97e-36
>ENA|ELU37066|ELU37066.1	hypothetical protein AG1IA_08887	429.8	25488.6	0.0168624	-5.89004	0	0
>ENA|ELU37081|ELU37081.1	hypothetical protein AG1IA_08902	260.322	1592.18	0.1635	-2.61264	6.45e-80	1.06e-78
>ENA|ELU37058|ELU37058.1	hypothetical protein AG1IA_08913	293.695	9496.46	0.0309268	-5.015	4.97e-109	1.38e-107
>ENA|ELU37046|ELU37046.1	hypothetical protein AG1IA_08920	576	2077.56	0.277249	-1.85075	8.78e-07	1.64e-06
>ENA|ELU37051|ELU37051.1	hypothetical protein AG1IA_08925	591.808	2892.37	0.20461	-2.28905	2.14e-68	2.82e-67
>ENA|ELU37044|ELU37044.1	hypothetical protein AG1IA_08926	2928.82	404.096	7.24782	2.85755	4.5e-11	1.08e-10
>ENA|ELU37041|ELU37041.1	hypothetical protein AG1IA_08927	7897.24	1556.57	5.07349	2.34298	3.29e-77	5.22e-76
>ENA|ELU37042|ELU37042.1	hypothetical protein AG1IA_08928	8715.69	1631.65	5.34164	2.41728	2.09e-82	3.59e-81
>ENA|ELU37043|ELU37043.1	hypothetical protein AG1IA_08929	3062.15	637.909	4.80029	2.26312	2.84e-67	3.66e-66
>ENA|ELU36944|ELU36944.1	hypothetical protein AG1IA_09026	208.237	53.3237	3.90515	1.96538	4.87e-22	1.92e-21
>ENA|ELU36937|ELU36937.1	hypothetical protein AG1IA_09031	41.9032	401.012	0.104494	-3.25851	3.96e-68	5.2e-67
>ENA|ELU36840|ELU36840.1	hypothetical protein AG1IA_09127	87.1	316.379	0.275303	-1.86091	3.11e-19	1.09e-18
>ENA|ELU36839|ELU36839.1	hypothetical protein AG1IA_09134	479.254	122.619	3.9085	1.96662	6.93e-30	3.56e-29
>ENA|ELU36819|ELU36819.1	hypothetical protein AG1IA_09157	965.942	8719.57	0.110779	-3.17425	7.09e-23	2.87e-22
>ENA|ELU36792|ELU36792.1	hypothetical protein AG1IA_09178	82.8231	664.715	0.124599	-3.00463	1.8e-33	1.03e-32
>ENA|ELU36782|ELU36782.1	hypothetical protein AG1IA_09189	144.899	825.388	0.175553	-2.51002	3.94e-60	4.43e-59
>ENA|ELU36767|ELU36767.1	hypothetical protein AG1IA_09197	381.289	56.6807	6.72697	2.74996	7.13e-36	4.38e-35
>ENA|ELU36764|ELU36764.1	hypothetical protein AG1IA_09207	109.56	1303.46	0.0840535	-3.57255	8.87e-125	3.05e-123
>ENA|ELU36714|ELU36714.1	hypothetical protein AG1IA_09255	1446.36	274.815	5.26302	2.39589	4.41e-62	5.17e-61
>ENA|ELU36690|ELU36690.1	hypothetical protein AG1IA_09285	503.988	1875.1	0.268779	-1.89551	5.8e-46	4.78e-45
>ENA|ELU36676|ELU36676.1	hypothetical protein AG1IA_09287	141.52	836.958	0.169088	-2.56415	4.03e-66	5.1e-65
>ENA|ELU36634|ELU36634.1	hypothetical protein AG1IA_09337	125.178	463.97	0.269798	-1.89005	2.62e-20	9.6e-20
>ENA|ELU36603|ELU36603.1	hypothetical protein AG1IA_09365	1531.06	191.847	7.98062	2.9965	5.22e-40	3.6e-39
>ENA|ELU36593|ELU36593.1	hypothetical protein AG1IA_09372	7625.65	30980.6	0.246143	-2.02243	1.24e-13	3.42e-13
>ENA|ELU36530|ELU36530.1	hypothetical protein AG1IA_09444	884.057	256.172	3.45103	1.78703	8.53e-33	4.82e-32
>ENA|ELU36532|ELU36532.1	hypothetical protein AG1IA_09446	588.452	4976.83	0.118238	-3.08023	1.43e-85	2.59e-84
>ENA|ELU36516|ELU36516.1	hypothetical protein AG1IA_09454	20.9626	605.511	0.0346197	-4.85226	2.79e-31	1.5e-30
>ENA|ELU36513|ELU36513.1	hypothetical protein AG1IA_09457	349.999	8299.17	0.0421728	-4.56754	1.2e-236	1.35e-234
>ENA|ELU36488|ELU36488.1	hypothetical protein AG1IA_09483	663.271	2347.2	0.282579	-1.82327	4.54e-45	3.61e-44
>ENA|ELU36336|ELU36336.1	hypothetical protein AG1IA_09638	316.993	74.8607	4.23444	2.08217	1.24e-21	4.77e-21
>ENA|ELU36255|ELU36255.1	hypothetical protein AG1IA_09715	60.1219	1715.19	0.0350527	-4.83433	6.35e-180	3.92e-178
>ENA|ELU36253|ELU36253.1	hypothetical protein AG1IA_09716	150.736	4174.02	0.036113	-4.79134	1.36e-236	1.5e-234
>ENA|ELU36217|ELU36217.1	hypothetical protein AG1IA_09753	384.161	69.1915	5.55214	2.47304	1.44e-20	5.33e-20
>ENA|ELU36204|ELU36204.1	hypothetical protein AG1IA_09767	117.766	484.851	0.24289	-2.04162	6.33e-35	3.77e-34
>ENA|ELU36186|ELU36186.1	hypothetical protein AG1IA_09784	90.1139	4004.3	0.0225043	-5.47366	1.83e-228	1.83e-226
>ENA|ELU36126|ELU36126.1	hypothetical protein AG1IA_09844	693.14	2778.87	0.249432	-2.00328	4.71e-46	3.9e-45
>ENA|ELU36124|ELU36124.1	hypothetical protein AG1IA_09846	1662.62	44.7538	37.1505	5.21531	8.51e-183	5.41e-181
>ENA|ELU36071|ELU36071.1	hypothetical protein AG1IA_09899	1842.8	5719.83	0.322177	-1.63408	3.43e-39	2.32e-38
>ENA|ELU36058|ELU36058.1	hypothetical protein AG1IA_09912	351.901	1227.31	0.286727	-1.80225	8.84e-32	4.83e-31
>ENA|ELU35964|ELU35964.1	hypothetical protein AG1IA_10006	338.933	111.833	3.03071	1.59966	5.92e-19	2.05e-18
>ENA|ELU35958|ELU35958.1	hypothetical protein AG1IA_10012	87.3987	514.335	0.169926	-2.55702	4.52e-29	2.27e-28
>ENA|ELU35927|ELU35927.1	hypothetical protein AG1IA_10043	260.632	253598	0.00102773	-9.92632	0	0
>ENA|ELU35921|ELU35921.1	hypothetical protein AG1IA_10049	1001.87	160.719	6.23363	2.64007	1.08e-13	2.99e-13
>ENA|ELU35908|ELU35908.1	hypothetical protein AG1IA_10062	388.107	1348.83	0.287737	-1.79718	1.66e-13	4.54e-13
>ENA|ELU35903|ELU35903.1	hypothetical protein AG1IA_10067	110.704	690.976	0.160214	-2.64193	3.94e-65	4.91e-64
>ENA|ELU35881|ELU35881.1	hypothetical protein AG1IA_10089	105.99	986.347	0.107457	-3.21817	2.68e-95	6.04e-94
>ENA|ELU35869|ELU35869.1	hypothetical protein AG1IA_10101	71.4077	857.349	0.0832889	-3.58573	5.33e-108	1.46e-106
>ENA|ELU35824|ELU35824.1	hypothetical protein AG1IA_10146	35.6207	286.866	0.124172	-3.00959	1.42e-32	7.96e-32
>ENA|ELU35805|ELU35805.1	hypothetical protein AG1IA_10165	3022.08	11705.8	0.25817	-1.95361	1.44e-14	4.16e-14
>ENA|ELU35491|ELU35491.1	hypothetical protein AG1IA_10479	249.961	1199.25	0.208431	-2.26236	1.72e-58	1.85e-57
>ENA|ELU35490|ELU35490.1	hypothetical protein AG1IA_10480	6.87276	5630.43	0.00122065	-9.67814	0	0
>ENA|ELU40304|ELU40304.1	hypothetical protein HETIRDRAFT_406788	3589.32	1195.4	3.00263	1.58622	2.28e-35	1.38e-34
>ENA|ELU41084|ELU41084.1	hypothetical protein RSOLAG22IIIB_04552	51.0019	1325.69	0.038472	-4.70005	3.86e-50	3.49e-49
>ENA|ELU38401|ELU38401.1	IBR domain-containing	67.3512	662.25	0.101701	-3.2976	4.94e-86	9.19e-85
>ENA|ELU38400|ELU38400.1	IBR domain-containing	304.06	1436.18	0.211715	-2.23981	4.27e-43	3.23e-42
>ENA|ELU42894|ELU42894.1	Ifi-6-16 domain-containing	493.624	112.988	4.36881	2.12724	4.53e-25	1.97e-24
>ENA|ELU37504|ELU37504.1	Ifi-6-16 domain-containing	98.0926	570.785	0.171856	-2.54073	3.56e-22	1.41e-21
>ENA|ELU43533|ELU43533.1	IMP cyclohydrolase phosphoribosylaminoimidazolecarboxamidefo	1998.8	563.457	3.54739	1.82676	6.31e-40	4.35e-39
>ENA|ELU43659|ELU43659.1	import inner membrane translocase subunit tim44	1066.26	335.16	3.18134	1.66963	1.81e-32	1.01e-31
>ENA|ELU41433|ELU41433.1	importin alpha subunit	11603.3	3647.58	3.18108	1.66952	9.67e-43	7.25e-42
>ENA|ELU44572|ELU44572.1	importin beta-4 subunit	19706.3	2256.68	8.73241	3.12638	2.65e-133	1.05e-131
>ENA|ELU44118|ELU44118.1	IncA domain-containing protein	393.005	2115.02	0.185816	-2.42806	2.91e-32	1.61e-31
>ENA|ELU44847|ELU44847.1	inorganic phosphate transporter	9704.35	2039.28	4.75871	2.25057	1.64e-16	5.18e-16
>ENA|ELU40981|ELU40981.1	inorganic phosphate transporter	23804.6	4384.23	5.4296	2.44085	9.7e-26	4.3e-25
>ENA|ELU44615|ELU44615.1	integral membrane	1231.95	8922.42	0.138073	-2.85649	5.21e-78	8.39e-77
>ENA|ELU42710|ELU42710.1	iron ascorbate oxidoreductase	188.982	581.492	0.324995	-1.62151	8.46e-28	4.08e-27
>ENA|ELU37765|ELU37765.1	Ish1 domain-containing	386.036	1661.15	0.232391	-2.10537	3.65e-05	6.09e-05
>ENA|ELU40296|ELU40296.1	Ish1 domain-containing	229.618	2683.92	0.085553	-3.54704	6.1e-141	2.65e-139
>ENA|ELU37734|ELU37734.1	Ish1 domain-containing	1268.79	8313.65	0.152616	-2.71203	2.57e-100	6.38e-99
>ENA|ELU38469|ELU38469.1	isoleucyl-tRNA synthetase	5320.42	1755.67	3.03043	1.59952	8.9e-38	5.79e-37
>ENA|ELU41721|ELU41721.1	isopentenyl-diphosphate Delta-isomerase	1372.75	255.156	5.38006	2.42762	9.68e-58	1.03e-56
>ENA|ELU37271|ELU37271.1	jumonji superfamily	339.311	1384.52	0.245075	-2.0287	5.6e-35	3.34e-34
>ENA|ELU40404|ELU40404.1	karyopherin Kap95	8390.28	2432.73	3.44892	1.78614	1.01e-47	8.71e-47
>ENA|ELU37578|ELU37578.1	kelch motif domain-containing	76.838	344.611	0.22297	-2.16508	8.98e-33	5.06e-32
>ENA|ELU40457|ELU40457.1	ketol-acid reductoisomerase	10284.6	1630.86	6.30623	2.65678	2.12e-50	1.94e-49
>ENA|ELU42146|ELU42146.1	ketoreductase	1108.46	4845.77	0.228749	-2.12817	3.35e-63	4.01e-62
>ENA|ELU43194|ELU43194.1	kinase activator Bem1	317.592	3439.88	0.0923266	-3.43711	7.98e-137	3.33e-135
>ENA|ELU45038|ELU45038.1	kinesin heavy chain	4244.61	1153.49	3.67979	1.87962	1.35e-44	1.06e-43
>ENA|ELU44583|ELU44583.1	KOW domain-containing	6404.61	678.641	9.43742	3.23839	4.32e-86	8.06e-85
>ENA|ELU45187|ELU45187.1	L-ornithine transporter	629.255	109.753	5.73339	2.51939	7.75e-50	6.94e-49
>ENA|ELU37123|ELU37123.1	laccase precursor	80.9435	7827.31	0.0103412	-6.59546	0	0
>ENA|ELU39444|ELU39444.1	laccase-1	285.492	1033.36	0.276275	-1.85582	2.52e-37	1.62e-36
>ENA|ELU38091|ELU38091.1	Lactonase domain-containing	1216.62	175.394	6.93647	2.7942	3.83e-72	5.5e-71
>ENA|ELU40836|ELU40836.1	leucine aminopeptidase	3407.3	586.899	5.80559	2.53744	6.06e-41	4.34e-40
>ENA|ELU36757|ELU36757.1	leucine carboxyl methyltransferase	393.038	47.5816	8.26028	3.04619	1.13e-50	1.04e-49
>ENA|ELU38506|ELU38506.1	leucine rich repeat domain-containing	741.593	133.514	5.55443	2.47364	1.41e-17	4.68e-17
>ENA|ELU36517|ELU36517.1	leucyl-tRNA synthetase	10749.7	3051.2	3.52309	1.81684	1.07e-49	9.54e-49
>ENA|ELU37764|ELU37764.1	lincomycin-condensing lmbA	215.824	67.1569	3.21373	1.68425	4.02e-09	8.66e-09
>ENA|ELU44744|ELU44744.1	linker histone h1 and h5 family domain-containing	1897.44	7741.92	0.245086	-2.02864	7.05e-32	3.87e-31
>ENA|ELU37245|ELU37245.1	linoleate diol synthase	7716.63	75985.2	0.101554	-3.29967	2.81e-147	1.31e-145
>ENA|ELU39490|ELU39490.1	linoleate diol synthase	3727.93	123707	0.0301352	-5.05241	4.34e-296	8.82e-294
>ENA|ELU45060|ELU45060.1	lipase	253.386	767.016	0.330353	-1.59792	5.87e-27	2.73e-26
>ENA|ELU42865|ELU42865.1	lipase domain-containing	158.776	3335.59	0.0476007	-4.39287	4.68e-148	2.2e-146
>ENA|ELU43878|ELU43878.1	lipase domain-containing	308.345	8357.11	0.0368962	-4.76039	6.76e-252	9.25e-250
>ENA|ELU40866|ELU40866.1	lipase esterase enzyme from carbohydrate esterase family CE10	454.815	113.395	4.0109	2.00393	6.8e-31	3.62e-30
>ENA|ELU40643|ELU40643.1	lipase I	124.787	4227.2	0.02952	-5.08216	6.98e-254	1.02e-251
>ENA|ELU45627|ELU45627.1	lipid metabolism-related	295.052	1998.4	0.147645	-2.7598	2.44e-88	4.8e-87
>ENA|ELU44590|ELU44590.1	LMWPc domain-containing	415.764	2023.46	0.205472	-2.28299	5.46e-30	2.81e-29
>ENA|ELU38801|ELU38801.1	LTV domain-containing	1390.94	396.722	3.50608	1.80986	3.93e-39	2.65e-38
>ENA|ELU40632|ELU40632.1	lysine ornithine N-monooxygenase	551.698	121.735	4.53195	2.18013	3.67e-10	8.38e-10
>ENA|ELU45899|ELU45899.1	lysophospholipase I	1363.28	387.078	3.52198	1.81639	8.44e-23	3.4e-22
>ENA|ELU42515|ELU42515.1	lysyl-tRNA synthetase	3590.55	948.319	3.78623	1.92076	1.12e-33	6.43e-33
>ENA|ELU45162|ELU45162.1	major alcohol dehydrogenase	8135.4	1059.81	7.67627	2.94041	3.11e-113	9.4e-112
>ENA|ELU42127|ELU42127.1	Major Facilitator Superfamily	189.636	60.4069	3.13931	1.65045	8.9e-14	2.47e-13
>ENA|ELU42126|ELU42126.1	Major Facilitator Superfamily	842.843	119.717	7.04032	2.81564	7.43e-68	9.68e-67
>ENA|ELU40300|ELU40300.1	mannitol-1-phosphate dehydrogenase MPDH1	177.638	1082.32	0.164127	-2.60712	6.05e-41	4.33e-40
>ENA|ELU39298|ELU39298.1	mannoprotein	2115.68	35071.9	0.0603241	-4.05112	1.5e-206	1.21e-204
>ENA|ELU39697|ELU39697.1	mannose-6-phosphate isomerase	2651.2	463.1	5.72491	2.51725	7.55e-77	1.19e-75
>ENA|ELU40556|ELU40556.1	mannosyltransferase domain-containing	20.2887	1465.91	0.0138403	-6.17498	4.55e-254	6.82e-252
>ENA|ELU45517|ELU45517.1	MAPEG domain-containing	1478.4	447.304	3.30514	1.72471	8.82e-36	5.4e-35
>ENA|ELU42147|ELU42147.1	MARVEL domain-containing	1152.27	244.681	4.7093	2.23551	8.31e-53	8.04e-52
>ENA|ELU38768|ELU38768.1	MARVEL domain-containing protein	285.681	2557.03	0.111724	-3.16199	2.94e-116	9.09e-115
>ENA|ELU41194|ELU41194.1	Med5 domain-containing	2506.57	825.16	3.03767	1.60297	5.24e-35	3.13e-34
>ENA|ELU39225|ELU39225.1	membrane transporter	342.808	1317.09	0.260278	-1.94188	9.83e-33	5.52e-32
>ENA|ELU40770|ELU40770.1	membrane transporter	112.672	683.16	0.164927	-2.6001	6.62e-60	7.41e-59
>ENA|ELU43122|ELU43122.1	Memo-like domain-containing	7539.52	1876.19	4.01852	2.00666	2.56e-50	2.33e-49
>ENA|ELU36497|ELU36497.1	metallopeptidase MepB	4131.62	1271.75	3.24876	1.69989	3.67e-29	1.85e-28
>ENA|ELU45010|ELU45010.1	methionine adenosyltransferase	11488.6	1943.87	5.91016	2.5632	2.91e-93	6.22e-92
>ENA|ELU44219|ELU44219.1	methionyl tRNA synthetase	2049.48	420.236	4.87698	2.28599	4.51e-62	5.28e-61
>ENA|ELU45687|ELU45687.1	methylenetetrahydrofolate dehydrogenase	720.873	125.726	5.73368	2.51946	3.09e-53	3e-52
>ENA|ELU43677|ELU43677.1	methylenetetrahydrofolate reductase 1	1351.16	394.163	3.42794	1.77734	1.16e-38	7.74e-38
>ENA|ELU42975|ELU42975.1	methyltransferase domain-containing	1378.63	8.5314	161.595	7.33624	4.63e-216	4e-214
>ENA|ELU38977|ELU38977.1	methyltransferase domain-containing	341.944	34.7763	9.83268	3.29758	9.51e-51	8.81e-50
>ENA|ELU42182|ELU42182.1	methyltransferase domain-containing	73.6377	572.434	0.12864	-2.95859	1.39e-50	1.28e-49
>ENA|ELU43502|ELU43502.1	MFS monosaccharide transporter	643.999	185.968	3.46295	1.792	4.73e-24	2e-23
>ENA|ELU45366|ELU45366.1	MFS multidrug transporter	1116.33	45.8206	24.363	4.60662	6.89e-110	1.97e-108
>ENA|ELU43269|ELU43269.1	MFS transporter	151.642	586.509	0.25855	-1.95148	3.98e-37	2.54e-36
>ENA|ELU43982|ELU43982.1	MFS transporter	341.493	1976.97	0.172735	-2.53336	2.39e-63	2.88e-62
>ENA|ELU45212|ELU45212.1	MFS_1 domain-containing	369.903	52.0821	7.1023	2.82829	4.57e-47	3.88e-46
>ENA|ELU40378|ELU40378.1	MFS_1 domain-containing	107.266	550.036	0.195017	-2.35833	1.79e-10	4.16e-10
>ENA|ELU39499|ELU39499.1	MFS_1 domain-containing	331.702	1000.74	0.331458	-1.5931	9.5e-30	4.85e-29
>ENA|ELU36573|ELU36573.1	MFS_1 domain-containing	198.986	1240.69	0.160383	-2.64041	5.38e-76	8.31e-75
>ENA|ELU41533|ELU41533.1	MFS_1 domain-containing	757.395	6243.45	0.12131	-3.04323	8.07e-121	2.59e-119
>ENA|ELU37324|ELU37324.1	MFS_1 domain-containing protein	1058.52	161.004	6.57454	2.71689	2.36e-44	1.84e-43
>ENA|ELU42625|ELU42625.1	MFS_1 domain-containing protein	130.697	478.199	0.273312	-1.87138	2.14e-30	1.12e-29
>ENA|ELU44179|ELU44179.1	MFS_1 domain-containing protein	115.315	501.371	0.23	-2.1203	3.43e-41	2.47e-40
>ENA|ELU44514|ELU44514.1	MFS_1 domain-containing protein	397.813	1323.93	0.300479	-1.73466	1.16e-37	7.49e-37
>ENA|ELU36875|ELU36875.1	microtubule binding	3153.37	607.134	5.19385	2.37681	4.06e-72	5.81e-71
>ENA|ELU38521|ELU38521.1	Mis12 domain-containing	178.342	760.409	0.234535	-2.09213	2.41e-44	1.88e-43
>ENA|ELU37454|ELU37454.1	ML domain-containing	507.651	1737.11	0.292239	-1.77478	8.83e-41	6.26e-40
>ENA|ELU37366|ELU37366.1	monooxygenase	512.451	2588.28	0.197989	-2.33651	6.49e-71	9e-70
>ENA|ELU37370|ELU37370.1	monooxygenase	89.7155	3156.97	0.0284183	-5.13704	1e-255	1.54e-253
>ENA|ELU42974|ELU42974.1	mRNA export factor elf1	1889.06	180.995	10.4371	3.38365	2.87e-70	3.95e-69
>ENA|ELU42973|ELU42973.1	mRNA export factor elf1	3974.79	565.587	7.02773	2.81306	2.57e-100	6.38e-99
>ENA|ELU44569|ELU44569.1	MSF1 protein	2793.66	794.847	3.51471	1.81341	6.16e-26	2.75e-25
>ENA|ELU39589|ELU39589.1	mucoidy inhibitor A	436.492	5073.88	0.0860272	-3.53906	1.76e-152	8.6e-151
>ENA|ELU45946|ELU45946.1	multidrug resistance	1944.51	397.083	4.89698	2.29189	1.19e-61	1.38e-60
>ENA|ELU43847|ELU43847.1	multidrug resistance-associated ABC transporter	197.197	59.327	3.3239	1.73288	8.29e-21	3.11e-20
>ENA|ELU36975|ELU36975.1	multisynthetase complex auxiliary component p43	2413.08	663.79	3.63531	1.86208	2.56e-45	2.05e-44
>ENA|ELU42886|ELU42886.1	mycorrhiza-upregulated peptidase C14	440.463	119.741	3.67846	1.8791	2.44e-17	7.98e-17
>ENA|ELU39060|ELU39060.1	mycorrhiza-upregulated peptidase C14	2180.23	12329.8	0.176826	-2.4996	1.18e-87	2.29e-86
>ENA|ELU36657|ELU36657.1	myxovirus resistance 1	3367.75	934.933	3.60213	1.84885	5.13e-47	4.34e-46
>ENA|ELU45552|ELU45552.1	N-(5 -phospho-D-ribosylformimino)-5	188.849	1389.74	0.135888	-2.87951	3.55e-92	7.41e-91
>ENA|ELU40955|ELU40955.1	n-acetylglucosamine-6-phosphate deacetylase	367.936	56.5055	6.51152	2.70299	3.73e-40	2.6e-39
>ENA|ELU43970|ELU43970.1	N2227-like domain-containing	2355.99	18556.6	0.126962	-2.97753	1.22e-121	4.03e-120
>ENA|ELU43929|ELU43929.1	Na+ H+ exchanger 1	788.114	3167.89	0.248782	-2.00705	2.42e-54	2.41e-53
>ENA|ELU42413|ELU42413.1	NAC domain-containing	3550.36	859.517	4.13064	2.04637	1.84e-17	6.05e-17
>ENA|ELU39796|ELU39796.1	NAC domain-containing protein	4120.17	834.955	4.93459	2.30293	7.97e-45	6.29e-44
>ENA|ELU44740|ELU44740.1	NAD binding dehydrogenase	9143.16	1039.74	8.7937	3.13647	3.54e-129	1.34e-127
>ENA|ELU37564|ELU37564.1	NAD dependent epimerase dehydratase	337.689	70.0605	4.81995	2.26902	8.55e-32	4.67e-31
>ENA|ELU45374|ELU45374.1	NAD-dependent isocitrate dehydrogenase subunit 1 precursor	6736.97	1154.48	5.8355	2.54486	1.32e-85	2.4e-84
>ENA|ELU45604|ELU45604.1	NAD-dependent isocitrate dehydrogenase subunit 2	5485.74	817.36	6.71153	2.74664	4.88e-99	1.17e-97
>ENA|ELU37549|ELU37549.1	NADH dehydrogenase	4258.55	444.962	9.57059	3.25861	1.23e-126	4.41e-125
>ENA|ELU41063|ELU41063.1	NADH oxidase	472.875	24.1066	19.616	4.29396	4.18e-83	7.31e-82
>ENA|ELU37947|ELU37947.1	NADH oxidase	734.772	88.5403	8.29873	3.05289	2.75e-57	2.89e-56
>ENA|ELU42297|ELU42297.1	NADH:flavin oxidoreductase NADH oxidase	576.154	7.89175	73.0071	6.18996	1.14e-130	4.38e-129
>ENA|ELU41567|ELU41567.1	NADP(H)-dependent ketose reductase	1145.29	170.182	6.72982	2.75057	2.63e-34	1.53e-33
>ENA|ELU42105|ELU42105.1	NADPH oxidase regulator	201.758	872.951	0.231122	-2.11328	5.95e-14	1.66e-13
>ENA|ELU39776|ELU39776.1	nam9 protein	1078.35	342.978	3.14408	1.65264	8.85e-32	4.83e-31
>ENA|ELU36606|ELU36606.1	NAP domain-containing	4696.77	874.504	5.37077	2.42513	2.19e-78	3.55e-77
>ENA|ELU44545|ELU44545.1	NCS cytosine-purine permease	440.396	120.324	3.66009	1.87188	6.81e-25	2.95e-24
>ENA|ELU40049|ELU40049.1	neutral trehalase	4775.42	782.803	6.1004	2.6089	4.84e-32	2.66e-31
>ENA|ELU45330|ELU45330.1	nin one binding	1171.5	363.797	3.2202	1.68715	8.96e-33	5.05e-32
>ENA|ELU44309|ELU44309.1	NMDA receptor-regulated 1a	1839.14	387.396	4.74745	2.24715	2.35e-59	2.57e-58
>ENA|ELU36601|ELU36601.1	NmrA domain-containing protein	904.157	12068.3	0.0749199	-3.73851	5.67e-177	3.28e-175
>ENA|ELU45169|ELU45169.1	NmrA domain-containing protein	962.626	123.521	7.79319	2.96221	1.62e-73	2.43e-72
>ENA|ELU45141|ELU45141.1	NmrA domain-containing protein	916.742	303.559	3.01998	1.59454	1.38e-22	5.54e-22
>ENA|ELU38570|ELU38570.1	noc2p	1456.18	285.512	5.10022	2.35056	2.04e-40	1.43e-39
>ENA|ELU40565|ELU40565.1	nod factor export ATP-binding I	2433.92	720.748	3.37694	1.75572	2.48e-41	1.78e-40
>ENA|ELU45594|ELU45594.1	nucleoside diphosphate kinase	29166.4	6270.95	4.65103	2.21755	9.35e-28	4.49e-27
>ENA|ELU39214|ELU39214.1	nucleosome assembly I	4206.78	1312.43	3.20534	1.68048	1.23e-40	8.73e-40
>ENA|ELU41880|ELU41880.1	NUDIX domain-containing	250.397	57.9901	4.31792	2.11034	2.02e-07	3.94e-07
>ENA|ELU36137|ELU36137.1	O-acetylserine sulfhydrylase homocysteine synthase	561.906	183.153	3.06797	1.61728	4.12e-24	1.75e-23
>ENA|ELU44670|ELU44670.1	O-methyltransferase family 3	413.55	3697.73	0.111839	-3.16051	1.14e-122	3.81e-121
>ENA|ELU37077|ELU37077.1	oligopeptide transporter	7802.84	1147.5	6.79984	2.7655	5.58e-103	1.42e-101
>ENA|ELU44586|ELU44586.1	oligosaccharyl transferase subunit OST3 OST6 family	1134.93	6654.37	0.170554	-2.5517	8.15e-89	1.61e-87
>ENA|ELU37054|ELU37054.1	OPT oligopeptide transporter	11692.3	36155.7	0.323388	-1.62866	1.44e-41	1.05e-40
>ENA|ELU42092|ELU42092.1	OPT oligopeptide transporter family	57.0997	2525.13	0.0226126	-5.46673	2.89e-250	3.87e-248
>ENA|ELU37106|ELU37106.1	oxalate decarboxylase	232.096	60.6973	3.82383	1.93502	3.01e-16	9.4e-16
>ENA|ELU37101|ELU37101.1	oxalate decarboxylase	954.781	130.238	7.33105	2.87402	2.56e-76	3.98e-75
>ENA|ELU37097|ELU37097.1	oxalate decarboxylase	746.165	22158.4	0.0336741	-4.89222	5.31e-275	9.28e-273
>ENA|ELU43116|ELU43116.1	oxidoreductase	1906.32	12324.1	0.154682	-2.69262	4.59e-100	1.12e-98
>ENA|ELU40211|ELU40211.1	P450 family fatty acid hydroxylase	3647.53	396.147	9.20751	3.20281	1.93e-92	4.07e-91
>ENA|ELU40618|ELU40618.1	PA domain-containing	115.904	511.073	0.226787	-2.14059	9.2e-40	6.33e-39
>ENA|ELU36948|ELU36948.1	palmitoyl- thioesterase	189.682	753.537	0.251723	-1.99009	3.77e-40	2.62e-39
>ENA|ELU41355|ELU41355.1	pantothenate transporter	706.411	111.708	6.32371	2.66077	2.51e-10	5.77e-10
>ENA|ELU38452|ELU38452.1	Patatin domain-containing	16101.7	2384.24	6.75342	2.75562	3.96e-71	5.53e-70
>ENA|ELU42104|ELU42104.1	PB1 domain-containing	275.905	1541.1	0.179031	-2.48172	6.09e-71	8.46e-70
>ENA|ELU43282|ELU43282.1	PBP domain-containing	357.961	113.907	3.14258	1.65195	1.24e-19	4.4e-19
>ENA|ELU45023|ELU45023.1	PBP domain-containing	209.469	983.105	0.213069	-2.23061	1.22e-51	1.15e-50
>ENA|ELU45537|ELU45537.1	PCI domain-containing	2800.1	335.117	8.35558	3.06274	1.43e-54	1.44e-53
>ENA|ELU41215|ELU41215.1	peptidase inhibitor clitocypin domain-containing	309.104	2358.41	0.131064	-2.93165	1.74e-64	2.14e-63
>ENA|ELU41633|ELU41633.1	peptidase inhibitor clitocypin domain-containing protein	45.2056	6928.32	0.00652475	-7.25986	1.49e-57	1.57e-56
>ENA|ELU41632|ELU41632.1	peptidase inhibitor clitocypin domain-containing protein	39.1689	30369.1	0.00128976	-9.59868	0	0
>ENA|ELU38690|ELU38690.1	peptidase inhibitor i9 domain-containing protein	26.2165	450.191	0.0582342	-4.10199	2.57e-101	6.46e-100
>ENA|ELU40037|ELU40037.1	peptidase M14	490.202	1592.94	0.307735	-1.70024	1.74e-37	1.12e-36
>ENA|ELU45772|ELU45772.1	peptide-N4-(N-acetyl-beta-glucosaminyl)asparagine amidase A	87.167	292.757	0.297745	-1.74785	1.37e-09	3.02e-09
>ENA|ELU36254|ELU36254.1	peptidyl-prolyl cis-trans isomerase	3450.34	686.726	5.02434	2.32893	1.09e-45	8.87e-45
>ENA|ELU44510|ELU44510.1	peroxidase	515.324	38.2607	13.4688	3.75154	8.23e-70	1.13e-68
>ENA|ELU42242|ELU42242.1	peroxidase	35.0988	5236.62	0.00670257	-7.22107	6.51e-152	3.13e-150
>ENA|ELU40671|ELU40671.1	peroxysomal citrate synthase	2113.44	474.195	4.45691	2.15604	2.92e-44	2.26e-43
>ENA|ELU42129|ELU42129.1	phenylalanine ammonium lyase	2428.05	18706.2	0.129799	-2.94565	1.63e-78	2.65e-77
>ENA|ELU39899|ELU39899.1	phlebovirus nonstructural domain-containing	703.266	2497.97	0.281535	-1.82862	6.27e-13	1.66e-12
>ENA|ELU41177|ELU41177.1	phosphatase regulatory subunit domain-containing	7528.4	24795.5	0.30362	-1.71966	5.61e-27	2.61e-26
>ENA|ELU44409|ELU44409.1	phosphatase type 2C	2933.01	946.268	3.09956	1.63206	1.36e-31	7.4e-31
>ENA|ELU42325|ELU42325.1	phosphate transport MIR1	1064.87	214.397	4.9668	2.31232	1.6e-49	1.42e-48
>ENA|ELU41243|ELU41243.1	phosphate transporter	739.558	4983.26	0.148408	-2.75236	2.88e-100	7.08e-99
>ENA|ELU44140|ELU44140.1	phosphatidylserine decarboxylase domain-containing	123.856	633.475	0.195519	-2.35462	1.77e-37	1.14e-36
>ENA|ELU39054|ELU39054.1	phosphatidylserine decarboxylase family	58.1253	1877.36	0.0309612	-5.01339	5.77e-226	5.59e-224
>ENA|ELU38241|ELU38241.1	phosphatidylserine synthase 2	502.898	166.587	3.01883	1.59399	1.23e-22	4.93e-22
>ENA|ELU38454|ELU38454.1	phospho phosphatase	559.347	136.745	4.09044	2.03226	2.05e-35	1.24e-34
>ENA|ELU35955|ELU35955.1	phospho-2-dehydro-3-deoxyheptonate aldolase	357.176	17.6508	20.2356	4.33883	3.7e-23	1.51e-22
>ENA|ELU41120|ELU41120.1	phosphoglucomutase	9098.05	1524.98	5.96602	2.57677	3.19e-92	6.68e-91
>ENA|ELU42467|ELU42467.1	phospholipase A2 ( )	1395.87	379.727	3.67599	1.87813	2.01e-41	1.45e-40
>ENA|ELU43235|ELU43235.1	phosphoribosylaminoimidazole-succinocarboxamide synthase	705.3	88.509	7.96869	2.99434	6.81e-68	8.9e-67
>ENA|ELU39932|ELU39932.1	phosphoribosylformylglycinamidine cyclo-ligase	1885.64	170.822	11.0386	3.46449	1.29e-110	3.71e-109
>ENA|ELU37178|ELU37178.1	phytase	690.27	96.3542	7.16388	2.84074	1.46e-67	1.89e-66
>ENA|ELU44625|ELU44625.1	PIH1 domain-containing	583.568	170.044	3.43187	1.77899	1.07e-27	5.13e-27
>ENA|ELU37033|ELU37033.1	Pkinase domain-containing	62.1532	284.391	0.218549	-2.19397	2.76e-34	1.61e-33
>ENA|ELU36905|ELU36905.1	Pkinase domain-containing	2348.12	369.466	6.35544	2.66799	2.85e-61	3.27e-60
>ENA|ELU45377|ELU45377.1	Pkinase domain-containing	6297.51	533.145	11.812	3.56218	1.77e-83	3.1e-82
>ENA|ELU39268|ELU39268.1	Pkinase domain-containing	153.913	642.784	0.239448	-2.06222	3.17e-40	2.21e-39
>ENA|ELU40825|ELU40825.1	Pkinase domain-containing	253.922	776.197	0.327137	-1.61203	2.94e-27	1.38e-26
>ENA|ELU44656|ELU44656.1	plasma membrane fusion-related	2522.72	12042	0.209493	-2.25502	6.07e-73	8.87e-72
>ENA|ELU44162|ELU44162.1	plasma-membrane choline transporter domain-containing protein	997.282	3031.25	0.329001	-1.60384	2.03e-36	1.26e-35
>ENA|ELU37197|ELU37197.1	plastocyanin-like domain-containing	31.5058	19076.9	0.00165151	-9.242	4.86e-294	9.57e-292
>ENA|ELU40117|ELU40117.1	plectin S10 domain-containing	6499	894.474	7.26572	2.86111	1.72e-106	4.62e-105
>ENA|ELU41375|ELU41375.1	pneumovirus matrix domain-containing	128.363	32.6541	3.93098	1.97489	2.07e-14	5.92e-14
>ENA|ELU39103|ELU39103.1	Podoplanin domain-containing	14.2415	324.832	0.0438426	-4.51152	1.67e-93	3.59e-92
>ENA|ELU42102|ELU42102.1	polyadenylation factor subunit 2	407.082	1341.83	0.303378	-1.72081	7.12e-37	4.5e-36
>ENA|ELU37750|ELU37750.1	polymerase	624.769	3321.85	0.188079	-2.41059	1.09e-71	1.54e-70
>ENA|ELU45794|ELU45794.1	polysaccharide deacetylase domain-containing	280.936	4849.91	0.0579261	-4.10964	9.67e-193	6.69e-191
>ENA|ELU36884|ELU36884.1	polysaccharide deacetylase from carbohydrate esterase	3405.84	734.241	4.63859	2.21369	5.26e-54	5.19e-53
>ENA|ELU43312|ELU43312.1	polysaccharide lyase family 8	971.953	3273.89	0.296881	-1.75204	4.48e-44	3.45e-43
>ENA|ELU41490|ELU41490.1	POS9-activating factor FAP7	663.962	203.739	3.25889	1.70438	1.04e-28	5.16e-28
>ENA|ELU39702|ELU39702.1	PP-loop family domain-containing	243.697	2364.95	0.103045	-3.27865	9.68e-82	1.65e-80
>ENA|ELU38184|ELU38184.1	pre-mRNA-splicing factor PRP46	13147.8	2376.14	5.53325	2.46813	2.24e-86	4.22e-85
>ENA|ELU42516|ELU42516.1	prefoldin subunit domain-containing	760.856	250.04	3.04294	1.60547	1e-26	4.61e-26
>ENA|ELU38880|ELU38880.1	Profilin domain-containing	10549.7	3128.44	3.37219	1.75368	1.9e-46	1.59e-45
>ENA|ELU38979|ELU38979.1	proliferation-associated serine threonine kinase	825.002	246.819	3.34254	1.74094	3.65e-32	2.02e-31
>ENA|ELU44355|ELU44355.1	proline-tRNA ligase	938.793	186.269	5.03999	2.33342	7.47e-53	7.23e-52
>ENA|ELU35884|ELU35884.1	proline-tRNA ligase	1376.21	344.516	3.99463	1.99806	1.49e-30	7.88e-30
>ENA|ELU37758|ELU37758.1	proteasome 26S subunit	1746.55	315.83	5.53004	2.46729	6.23e-68	8.16e-67
>ENA|ELU42278|ELU42278.1	proteasome 26S subunit	1769.45	354.92	4.9855	2.31774	1.66e-61	1.91e-60
>ENA|ELU45543|ELU45543.1	proteasome 26S subunit	2101.19	529.363	3.96927	1.98888	1.36e-49	1.2e-48
>ENA|ELU40578|ELU40578.1	proteasome beta 4 subunit	3420.75	689.311	4.96257	2.31109	8.31e-27	3.85e-26
>ENA|ELU44038|ELU44038.1	proteasome complex subunit rpn13 ubiquitin receptor domain-	285.179	859.437	0.331821	-1.59152	4.15e-29	2.09e-28
>ENA|ELU44982|ELU44982.1	proteasome component pts1	3018.23	661.463	4.56296	2.18997	1.09e-30	5.76e-30
>ENA|ELU39824|ELU39824.1	proteasome subunit iota	2116.66	372.438	5.68326	2.50672	5.35e-23	2.17e-22
>ENA|ELU43494|ELU43494.1	protein kinase	2413.35	627.621	3.84523	1.94307	1.87e-48	1.63e-47
>ENA|ELU37627|ELU37627.1	protein ura1	3816.84	205.923	18.5353	4.2122	9.4e-116	2.89e-114
>ENA|ELU37610|ELU37610.1	purine transporter	6962.62	2153.89	3.23258	1.69268	1.76e-42	1.31e-41
>ENA|ELU40841|ELU40841.1	pyridoxal-dependent decarboxylase conserved domain-containing	238.512	180911	0.0013184	-9.567	0	0
>ENA|ELU40851|ELU40851.1	pyridoxal-dependent decarboxylase conserved domain-containing protein	730.36	247442	0.00295165	-8.40426	0	0
>ENA|ELU40838|ELU40838.1	pyridoxal-dependent decarboxylase domain-containing	485.938	18575.8	0.0261597	-5.25651	8.28e-170	4.45e-168
>ENA|ELU37697|ELU37697.1	pyridoxamine 5 -phosphate oxidase domain-containing	1089.14	5497.57	0.198112	-2.33561	4.21e-75	6.43e-74
>ENA|ELU44725|ELU44725.1	pyridoxamine 5&apos;-phosphate oxidase domain-containing protein	550.727	101.371	5.43281	2.4417	1.33e-16	4.21e-16
>ENA|ELU39628|ELU39628.1	pyridoxamine-phosphate oxidase	558.83	121.515	4.59885	2.20127	3.53e-39	2.38e-38
>ENA|ELU38855|ELU38855.1	pyroglutamyl peptidase domain-containing protein	327.35	91.4003	3.5815	1.84056	9.62e-22	3.72e-21
>ENA|ELU43619|ELU43619.1	pyruvate carboxylase	41652.5	13244.1	3.14498	1.65305	5.48e-43	4.13e-42
>ENA|ELU42358|ELU42358.1	quinate permease	68.639	259.701	0.2643	-1.91975	2.38e-26	1.08e-25
>ENA|ELU38909|ELU38909.1	R	76.989	587.019	0.131152	-2.93068	1.41e-76	2.22e-75
>ENA|ELU39869|ELU39869.1	RAB GDP-dissociation inhibitor	14247.3	3167.08	4.49855	2.16946	2.85e-69	3.84e-68
>ENA|ELU37628|ELU37628.1	Rab18	3378.8	993.873	3.39963	1.76538	3.35e-43	2.54e-42
>ENA|ELU40521|ELU40521.1	Ran GTPase activator	2648.26	713.749	3.71035	1.89155	1.21e-47	1.03e-46
>ENA|ELU44802|ELU44802.1	rare lipo A ( )-like double-psi beta-barrel domain-containing	1042.81	4131.77	0.252389	-1.98628	1.24e-28	6.15e-28
>ENA|ELU38273|ELU38273.1	rare lipo A ( )-like double-psi beta-barrel domain-containing	116.101	10424	0.0111379	-6.48838	1.79e-157	8.96e-156
>ENA|ELU36710|ELU36710.1	Ras domain-containing	1125.82	3943.55	0.285483	-1.80852	1.91e-22	7.6e-22
>ENA|ELU38267|ELU38267.1	Ras guanine-nucleotide exchange	793.704	5404.79	0.146852	-2.76757	1.42e-101	3.58e-100
>ENA|ELU41623|ELU41623.1	Ras-like GTP-binding RYL2 OS=Yarrowia lipolytica (strain CLIB 12	914.864	218.279	4.19126	2.06738	6.58e-41	4.69e-40
>ENA|ELU42840|ELU42840.1	Ras2	16385	1721.31	9.51892	3.2508	1.67e-140	7.14e-139
>ENA|ELU37825|ELU37825.1	RCC1 domain-containing protein	4929.53	681.886	7.22926	2.85385	9.8e-104	2.52e-102
>ENA|ELU44938|ELU44938.1	regulatory ral2	477.81	2056.9	0.232296	-2.10597	1.08e-56	1.12e-55
>ENA|ELU37338|ELU37338.1	Reovirus sigma C capsid domain-containing	1613.23	18333.7	0.087993	-3.50647	1.19e-160	6.03e-159
>ENA|ELU37248|ELU37248.1	response regulator receiver domain-containing protein	2099.99	163.646	12.8325	3.68173	1.89e-15	5.71e-15
>ENA|ELU36544|ELU36544.1	response to drug-related	84.4795	3680.58	0.0229528	-5.44519	7.38e-277	1.33e-274
>ENA|ELU42158|ELU42158.1	RGS domain-containing	487.189	5689.51	0.0856293	-3.54575	2.41e-154	1.19e-152
>ENA|ELU37876|ELU37876.1	RhoGEF domain-containing protein	191.252	1190.64	0.16063	-2.63819	2.3e-76	3.59e-75
>ENA|ELU44151|ELU44151.1	ribitol kinase	3913.22	612.686	6.38699	2.67514	6.88e-60	7.68e-59
>ENA|ELU42395|ELU42395.1	Ribonuclease domain-containing	1199.24	168.193	7.13012	2.83393	1.26e-84	2.26e-83
>ENA|ELU43741|ELU43741.1	ribonuclease h2 non-catalytic subunit domain-containing	107.134	324.884	0.329759	-1.60051	7.39e-16	2.27e-15
>ENA|ELU42133|ELU42133.1	ribonuclease t2 family domain-containing	902.942	103.272	8.74332	3.12818	8.76e-86	1.6e-84
>ENA|ELU41546|ELU41546.1	ribose-phosphate pyrophosphokinase 3	1968.33	500.135	3.9356	1.97658	1.49e-34	8.78e-34
>ENA|ELU39145|ELU39145.1	ribosomal L12	7089.2	1015.41	6.98164	2.80357	4.94e-56	5.07e-55
>ENA|ELU36735|ELU36735.1	ribosomal l14 domain-containing	6163.42	743.253	8.2925	3.05181	7.73e-94	1.68e-92
>ENA|ELU45214|ELU45214.1	ribosomal l18ae LX domain-containing	6623.5	1506.19	4.39752	2.13669	5.28e-45	4.19e-44
>ENA|ELU44864|ELU44864.1	ribosomal l19e domain-containing	9505.77	2930.65	3.24357	1.69758	1.17e-43	8.95e-43
>ENA|ELU38134|ELU38134.1	ribosomal l1p L10e family domain-containing	532.274	159.061	3.34635	1.74259	3.81e-27	1.78e-26
>ENA|ELU35581|ELU35581.1	ribosomal l21e domain-containing	5012.71	720.893	6.95347	2.79773	2.84e-100	7.01e-99
>ENA|ELU39252|ELU39252.1	ribosomal l24e domain-containing	7300.83	1582.38	4.61381	2.20596	2.04e-68	2.69e-67
>ENA|ELU44119|ELU44119.1	ribosomal l28e domain-containing	7979.32	1698.98	4.69653	2.23159	2.57e-70	3.55e-69
>ENA|ELU45557|ELU45557.1	ribosomal l29 domain-containing	8224.34	1309.43	6.28084	2.65096	5.16e-96	1.18e-94
>ENA|ELU42944|ELU42944.1	ribosomal l34e domain-containing	5781.51	904.888	6.3892	2.67563	8.61e-94	1.86e-92
>ENA|ELU43574|ELU43574.1	ribosomal l37e domain-containing	4599.64	350.531	13.1219	3.7139	9.66e-33	5.43e-32
>ENA|ELU42366|ELU42366.1	ribosomal l38e domain-containing	7115.18	1138.59	6.24909	2.64365	1.7e-71	2.38e-70
>ENA|ELU37144|ELU37144.1	ribosomal l39 domain-containing	4165.3	717.967	5.80151	2.53643	6.93e-82	1.19e-80
>ENA|ELU39999|ELU39999.1	ribosomal l44 domain-containing	5199.03	1082.13	4.80445	2.26437	1.13e-10	2.64e-10
>ENA|ELU43532|ELU43532.1	ribosomal l7Ae L30e S12e Gadd45 family domain-containing	5612.52	996.829	5.63037	2.49323	2.22e-34	1.3e-33
>ENA|ELU41698|ELU41698.1	ribosomal large subunit 13	12952.9	1799.65	7.19745	2.84749	3.24e-111	9.45e-110
>ENA|ELU38626|ELU38626.1	ribosomal protein S15a	6035.09	784.599	7.69194	2.94335	9.96e-76	1.53e-74
>ENA|ELU37100|ELU37100.1	ribosomal s10p S20e domain-containing	9977.48	1617.89	6.16697	2.62456	5.52e-95	1.24e-93
>ENA|ELU41452|ELU41452.1	ribosomal s14p S29e domain-containing	4872.22	830.092	5.8695	2.55324	2.92e-26	1.32e-25
>ENA|ELU38448|ELU38448.1	ribosomal S19	5795.8	742.435	7.80647	2.96467	2.21e-42	1.64e-41
>ENA|ELU43851|ELU43851.1	ribosomal s21e domain-containing	4999.51	867.31	5.76438	2.52717	1.35e-34	7.98e-34
>ENA|ELU40855|ELU40855.1	ribosomal s24e domain-containing protein	11411.7	2057.78	5.54561	2.47135	1.96e-86	3.71e-85
>ENA|ELU41666|ELU41666.1	ribosomal s25 domain-containing	9112.15	1443.02	6.31466	2.6587	5.65e-69	7.56e-68
>ENA|ELU44646|ELU44646.1	ribosomal s27 domain-containing	7564.67	1851.37	4.08599	2.03068	4.34e-35	2.61e-34
>ENA|ELU41503|ELU41503.1	ribosomal s9/S16 domain-containing protein	6641.78	827.03	8.03088	3.00556	4.2e-18	1.42e-17
>ENA|ELU43803|ELU43803.1	ribosome biogenesis tsr1	1704.3	381.67	4.46539	2.15879	8.3e-56	8.48e-55
>ENA|ELU43072|ELU43072.1	ribulose-phosphate 3 epimerase family domain-containing protein	909.152	196.23	4.63308	2.21197	2.13e-46	1.78e-45
>ENA|ELU39025|ELU39025.1	ricin-type beta-trefoil lectin domain-containing	11554.9	1784.16	6.47639	2.69519	1.8e-43	1.37e-42
>ENA|ELU42209|ELU42209.1	ricin-type beta-trefoil lectin domain-containing	5.12136	2748.61	0.00186326	-9.06796	0	0
>ENA|ELU37080|ELU37080.1	ricin-type beta-trefoil lectin domain-containing	360.246	363995	0.000989702	-9.98072	0	0
>ENA|ELU37059|ELU37059.1	Rieske [2Fe-2S] domain-containing	647.917	29427.4	0.0220175	-5.50521	0	0
>ENA|ELU43107|ELU43107.1	RIO1 domain-containing	436.18	100.929	4.32163	2.11158	5.17e-33	2.94e-32
>ENA|ELU43106|ELU43106.1	RIO1 domain-containing	1098.14	364.748	3.01067	1.59009	1.25e-29	6.36e-29
>ENA|ELU43407|ELU43407.1	RNA 2 -phosphotransferase	814.477	204.397	3.98478	1.9945	1.51e-38	1e-37
>ENA|ELU38114|ELU38114.1	RNA recognition motif domain-containing	1150.1	344.771	3.33585	1.73805	5.34e-35	3.19e-34
>ENA|ELU45354|ELU45354.1	RNA recognition motif domain-containing protein	2020.27	630.269	3.20541	1.68051	2.2e-37	1.42e-36
>ENA|ELU43278|ELU43278.1	RNase L inhibitor	2795.77	896.794	3.11752	1.6404	4.04e-37	2.58e-36
>ENA|ELU44984|ELU44984.1	Rpt3-PA	3780.11	716.617	5.27494	2.39916	5.28e-75	8.03e-74
>ENA|ELU42667|ELU42667.1	rRNA (adenine-N6	1458.7	370.433	3.93784	1.9774	4.31e-46	3.56e-45
>ENA|ELU43621|ELU43621.1	Rxt3 domain-containing	488.611	2023.09	0.241518	-2.0498	1.07e-53	1.05e-52
>ENA|ELU41255|ELU41255.1	s1 P1 nuclease domain-containing	193.089	10.5494	18.3033	4.19403	5.62e-58	6.01e-57
>ENA|ELU37079|ELU37079.1	salicylate 1-monooxygenase	713.028	3409.33	0.20914	-2.25746	2.74e-69	3.71e-68
>ENA|ELU38335|ELU38335.1	SAM-dependent RNA methyltransferase domain-containing	762.245	245.707	3.10225	1.63331	8.59e-20	3.08e-19
>ENA|ELU42607|ELU42607.1	Scs3p domain-containing	334.978	1089.94	0.307337	-1.70211	5.8e-35	3.46e-34
>ENA|ELU39667|ELU39667.1	SDA1 domain-containing	1264.04	234.674	5.38636	2.42931	4.12e-45	3.28e-44
>ENA|ELU35848|ELU35848.1	Senescence domain-containing	556.354	2042.57	0.27238	-1.87631	2.2e-46	1.83e-45
>ENA|ELU44191|ELU44191.1	serine carboxypeptidase	1792.7	462.212	3.87853	1.95551	4.61e-50	4.16e-49
>ENA|ELU36836|ELU36836.1	serine carboxypeptidase domain-containing	160.172	12.3477	12.9717	3.6973	1.17e-45	9.49e-45
>ENA|ELU36308|ELU36308.1	serine protease	336.841	96.929	3.47513	1.79707	1.17e-22	4.71e-22
>ENA|ELU36515|ELU36515.1	serine threonine kinase	112.558	2529.52	0.0444978	-4.49012	2.05e-200	1.5e-198
>ENA|ELU44223|ELU44223.1	serine threonine phosphatase 2A	4315.68	1258.23	3.42995	1.77819	7.99e-45	6.3e-44
>ENA|ELU40491|ELU40491.1	serine threonine- kinase bud32	558.896	145.015	3.85405	1.94638	2.4e-29	1.21e-28
>ENA|ELU40896|ELU40896.1	serine threonine- phosphatase 2B catalytic subunit A1	4058.81	1290.42	3.14534	1.65322	5.22e-39	3.5e-38
>ENA|ELU42039|ELU42039.1	serine-type endopeptidase	1089.81	7337.75	0.148521	-2.75126	1.05e-50	9.77e-50
>ENA|ELU39309|ELU39309.1	serum paraoxonase arylesterase	228.527	1138.29	0.200763	-2.31644	4.2e-59	4.59e-58
>ENA|ELU41168|ELU41168.1	SET domain-containing	422.166	97.6614	4.32276	2.11195	1.13e-27	5.4e-27
>ENA|ELU41080|ELU41080.1	SET domain-containing	100.172	352.385	0.284269	-1.81467	5.58e-33	3.17e-32
>ENA|ELU40462|ELU40462.1	SET domain-containing	498.95	1547.94	0.322332	-1.63338	7.41e-35	4.41e-34
>ENA|ELU40773|ELU40773.1	shk1 kinase-binding protein 1	901.108	288.41	3.12439	1.64358	6.46e-30	3.32e-29
>ENA|ELU38175|ELU38175.1	short chain dehydrogenase domain-containing	961.445	77.5315	12.4007	3.63235	1.81e-96	4.21e-95
>ENA|ELU37146|ELU37146.1	short chain dehydrogenase domain-containing	2065.27	85.1257	24.2614	4.60059	9.04e-169	4.82e-167
>ENA|ELU35957|ELU35957.1	short chain dehydrogenase domain-containing	45.0036	407.77	0.110365	-3.17964	2.13e-69	2.89e-68
>ENA|ELU44413|ELU44413.1	short chain dehydrogenase domain-containing	4628.33	1183.03	3.91226	1.968	2.95e-54	2.93e-53
>ENA|ELU44048|ELU44048.1	short chain dehydrogenase domain-containing	93.5141	3412.85	0.0274006	-5.18965	5.19e-257	8.17e-255
>ENA|ELU45400|ELU45400.1	short chain dehydrogenase domain-containing protein	2405.04	486.23	4.9463	2.30635	2.46e-65	3.07e-64
>ENA|ELU45368|ELU45368.1	short-chain dehydrogenase	783.175	238.277	3.28682	1.71669	9.49e-30	4.84e-29
>ENA|ELU39114|ELU39114.1	short-chain dehydrogenase	2375.25	455.681	5.21252	2.38198	1.11e-44	8.68e-44
>ENA|ELU40436|ELU40436.1	short-chain dehydrogenase	34.4683	2651.13	0.0130014	-6.26519	8.98e-302	1.95e-299
>ENA|ELU41805|ELU41805.1	Sim15	682.608	39.7475	17.1736	4.10212	3.33e-58	3.58e-57
>ENA|ELU39992|ELU39992.1	sin3b	386.878	105.619	3.66296	1.87301	3.09e-19	1.08e-18
>ENA|ELU40708|ELU40708.1	sodium calcium transporter	2330.88	704.734	3.30747	1.72573	1.34e-41	9.75e-41
>ENA|ELU39770|ELU39770.1	sodium-potassium ATPase	1138.85	50.5255	22.5401	4.49442	9.64e-37	6.07e-36
>ENA|ELU42849|ELU42849.1	sodium:inorganic phosphate symporter	4783.82	173.176	27.624	4.78785	3.52e-100	8.58e-99
>ENA|ELU41943|ELU41943.1	sorbose reductase sou1	438.243	3579.08	0.122446	-3.02978	5.44e-90	1.09e-88
>ENA|ELU40003|ELU40003.1	sphingolipid C9-methyltransferase	8501.02	1835.92	4.63039	2.21113	5.98e-31	3.19e-30
>ENA|ELU45072|ELU45072.1	START domain-containing	2488.3	14693.1	0.169352	-2.56191	6.12e-93	1.29e-91
>ENA|ELU38194|ELU38194.1	STE STE11 CDC15 kinase	405.801	134.245	3.02283	1.5959	9.56e-21	3.57e-20
>ENA|ELU38130|ELU38130.1	ste7-like protein	877.739	2971.88	0.295348	-1.75951	1.99e-43	1.51e-42
>ENA|ELU44020|ELU44020.1	sterol regulatory element binding cleavage-activating	299.073	1677.12	0.178325	-2.48742	6.27e-73	9.15e-72
>ENA|ELU42085|ELU42085.1	subtilase family domain-containing	820.493	260.278	3.15238	1.65644	2.24e-28	1.1e-27
>ENA|ELU44639|ELU44639.1	succinate-CoA ligase	4794.25	1298.37	3.69253	1.88461	9.75e-23	3.92e-22
>ENA|ELU39005|ELU39005.1	sugar	325.525	1081.28	0.301056	-1.7319	2.86e-13	7.75e-13
>ENA|ELU39162|ELU39162.1	sugar transporter	681.511	111.249	6.126	2.61494	1.63e-45	1.31e-44
>ENA|ELU44344|ELU44344.1	sugar transporter	869.17	116.627	7.45256	2.89774	2.22e-38	1.47e-37
>ENA|ELU41410|ELU41410.1	sugar transporter	7413.35	1378.4	5.37824	2.42713	5.78e-81	9.65e-80
>ENA|ELU44743|ELU44743.1	SUI1 domain-containing	5849.76	21218.9	0.275686	-1.8589	6.88e-52	6.5e-51
>ENA|ELU42511|ELU42511.1	sulfate adenylyltransferase	9577.88	2616	3.66127	1.87234	3.13e-52	3e-51
>ENA|ELU45691|ELU45691.1	SVP1 2	269.477	1036.9	0.259888	-1.94404	8.32e-43	6.25e-42
>ENA|ELU42000|ELU42000.1	t-complex 1	1870.87	166.645	11.2267	3.48886	1.82e-35	1.1e-34
>ENA|ELU41995|ELU41995.1	t-complex 1	1622.62	205.001	7.91522	2.98463	2.23e-68	2.94e-67
>ENA|ELU42613|ELU42613.1	T-complex 1	3075.37	300.953	10.2188	3.35315	6.11e-78	9.78e-77
>ENA|ELU44697|ELU44697.1	t-complex 1	4379.51	646.404	6.77518	2.76026	2.85e-97	6.68e-96
>ENA|ELU45917|ELU45917.1	t-complex 1	4878.05	661.78	7.3711	2.88188	2.23e-92	4.68e-91
>ENA|ELU40743|ELU40743.1	T-complex 1 subunit epsilon	5819.94	702.113	8.28918	3.05123	1.9e-68	2.51e-67
>ENA|ELU41331|ELU41331.1	TAFII28 domain-containing	328.112	1370.98	0.239327	-2.06295	1.5e-54	1.5e-53
>ENA|ELU43520|ELU43520.1	TAP-like domain-containing	173.792	2565.27	0.0677482	-3.88367	1.29e-125	4.56e-124
>ENA|ELU44099|ELU44099.1	TAP-like domain-containing	117.737	3342.2	0.0352274	-4.82716	2.05e-232	2.19e-230
>ENA|ELU39000|ELU39000.1	Tcp11 domain-containing protein	2300.6	9503.19	0.242087	-2.0464	1.12e-48	9.83e-48
>ENA|ELU45478|ELU45478.1	tetrahydrofolylpolyglutamate synthase	971.665	190.509	5.10036	2.3506	2.94e-55	2.97e-54
>ENA|ELU36775|ELU36775.1	thiamin pyrophosphokinase	1980.62	306.831	6.45507	2.69043	4.98e-80	8.19e-79
>ENA|ELU43501|ELU43501.1	Thioredoxin domain-containing	267.487	1771.46	0.150998	-2.7274	3.13e-87	6.05e-86
>ENA|ELU40147|ELU40147.1	threonine aldolase	571.908	97.0636	5.89209	2.55878	9.44e-51	8.76e-50
>ENA|ELU42698|ELU42698.1	threonine ammonia-lyase	1117.56	4284.93	0.26081	-1.93893	5.69e-48	4.92e-47
>ENA|ELU42812|ELU42812.1	threonine synthase	2353.41	733.214	3.20972	1.68245	1.06e-37	6.85e-37
>ENA|ELU36791|ELU36791.1	ThuA domain-containing protein	183.276	1198.76	0.152887	-2.70946	3.93e-54	3.89e-53
>ENA|ELU41102|ELU41102.1	ThuA domain-containing protein	104.924	1362.74	0.0769946	-3.6991	6.45e-130	2.45e-128
>ENA|ELU39532|ELU39532.1	thuringiensis toxin domain-containing	4182.58	627.304	6.66755	2.73716	3.24e-97	7.56e-96
>ENA|ELU42721|ELU42721.1	thymidylate synthase	1715	305.37	5.61612	2.48957	3.4e-69	4.57e-68
>ENA|ELU41692|ELU41692.1	TPR_1 domain-containing	395.416	120.943	3.26946	1.70905	6.13e-23	2.48e-22
>ENA|ELU36295|ELU36295.1	TPR_1 domain-containing	2428.24	409.462	5.93032	2.56811	1.22e-77	1.95e-76
>ENA|ELU43640|ELU43640.1	TPR_2 domain-containing	613.8	183.359	3.34753	1.7431	1.64e-28	8.07e-28
>ENA|ELU39386|ELU39386.1	Transaldolase domain-containing	560.627	51.2287	10.9436	3.45202	2.18e-69	2.95e-68
>ENA|ELU42889|ELU42889.1	transaminase	3695.86	461.144	8.01455	3.00262	8.65e-110	2.46e-108
>ENA|ELU42454|ELU42454.1	transcription factor	658.559	172.83	3.81044	1.92996	1.55e-24	6.67e-24
>ENA|ELU42455|ELU42455.1	transcription factor	620.43	186.705	3.32305	1.73251	7.75e-28	3.75e-27
>ENA|ELU42746|ELU42746.1	transcription factor	2975.53	856.642	3.47348	1.79638	1.13e-42	8.44e-42
>ENA|ELU39682|ELU39682.1	transcription factor	774.448	3897.12	0.198723	-2.33117	2.47e-73	3.67e-72
>ENA|ELU39013|ELU39013.1	transcription factor s-II (TFIIS) domain-containing	79.0042	302.66	0.261033	-1.9377	4.45e-28	2.16e-27
>ENA|ELU36719|ELU36719.1	transcription initiation factor IIA	466.295	1688.87	0.276099	-1.85674	2.79e-27	1.31e-26
>ENA|ELU43611|ELU43611.1	transcription initiation factor TFIID 23-30kDa subunit domain-	301.547	1070.35	0.281728	-1.82763	1.47e-38	9.76e-38
>ENA|ELU38272|ELU38272.1	transcription initiation factor TFIID complex 60 kDa subunit	314.01	1866.01	0.168279	-2.57108	1.51e-78	2.45e-77
>ENA|ELU40613|ELU40613.1	transducin family WD-40 repeat family	757.707	160.368	4.72481	2.24026	2.92e-46	2.43e-45
>ENA|ELU45587|ELU45587.1	transketolase 1	17333.7	4991.4	3.47271	1.79606	1.67e-29	8.48e-29
>ENA|ELU45480|ELU45480.1	translation elongation factor 2	677.224	171.319	3.953	1.98295	1.15e-35	7.02e-35
>ENA|ELU41409|ELU41409.1	translation initiation factor 3 subunit 3	2809.86	830.137	3.38482	1.75908	3.75e-42	2.76e-41
>ENA|ELU41419|ELU41419.1	transmembrane protein	3058.62	10093.1	0.30304	-1.72242	1.76e-39	1.2e-38
>ENA|ELU38913|ELU38913.1	Tyrosinase domain-containing	555.19	62.6921	8.85582	3.14663	1.23e-59	1.36e-58
>ENA|ELU39466|ELU39466.1	Tyrosinase domain-containing	112.129	647.367	0.173208	-2.52942	8.92e-58	9.49e-57
>ENA|ELU43994|ELU43994.1	Tyrosinase domain-containing	23.6749	4024.23	0.0058831	-7.40921	0	0
>ENA|ELU36581|ELU36581.1	Tyrosinase domain-containing	80.5584	10210.5	0.00788976	-6.9858	0	0
>ENA|ELU39832|ELU39832.1	Tyrosinase domain-containing	129.344	25349.4	0.00510244	-7.6146	0	0
>ENA|ELU39338|ELU39338.1	UBA domain-containing	6331.1	2091.73	3.02674	1.59776	3.45e-38	2.27e-37
>ENA|ELU39800|ELU39800.1	UBA domain-containing protein	1575.44	434.454	3.62625	1.85848	1.95e-16	6.13e-16
>ENA|ELU38700|ELU38700.1	ubiquinol-cytochrome C reductase hinge domain-containing protein	2605.12	796.999	3.26866	1.7087	2.68e-39	1.82e-38
>ENA|ELU44102|ELU44102.1	ubiquitin	16974.3	2955.78	5.74274	2.52174	3.18e-91	6.52e-90
>ENA|ELU40883|ELU40883.1	ubiquitin carboxyl-terminal hydrolase	508.795	105.864	4.80611	2.26487	9.73e-39	6.51e-38
>ENA|ELU38056|ELU38056.1	ubiquitin domain-containing	13012.8	3982.08	3.26784	1.70834	8.92e-32	4.86e-31
>ENA|ELU42354|ELU42354.1	ubiquitin- ligase molybdopterin-converting factor	703.579	210.418	3.34372	1.74146	9.82e-15	2.86e-14
>ENA|ELU36879|ELU36879.1	ubiquitin-conjugating enzyme e2-24 kda	1004.16	210.288	4.77515	2.25555	2.74e-49	2.42e-48
>ENA|ELU42664|ELU42664.1	ubiquitin-specific protease	952.057	225.748	4.21733	2.07633	1.69e-26	7.73e-26
>ENA|ELU40072|ELU40072.1	UCH domain-containing	2507.11	325.64	7.69903	2.94468	2.31e-96	5.35e-95
>ENA|ELU40264|ELU40264.1	UDP-N-acetylglucosamine diphosphorylase	4075.66	418.588	9.73668	3.28343	8.71e-127	3.15e-125
>ENA|ELU45042|ELU45042.1	UMP-CMP kinase	3596.51	877.521	4.09849	2.03509	6.26e-45	4.95e-44
>ENA|ELU41461|ELU41461.1	UMP1 domain-containing protein	2431.62	487.58	4.98712	2.31821	3.7e-65	4.63e-64
>ENA|ELU39332|ELU39332.1	UTP-glucose-1-phosphate uridylyltransferase	33834.5	3510.04	9.63937	3.26894	1.6e-146	7.36e-145
>ENA|ELU45091|ELU45091.1	vacuolar ABC heavy metal transporter (Hmt1)	40610.2	7404.21	5.48475	2.45543	2.14e-88	4.21e-87
>ENA|ELU44695|ELU44695.1	vacuolar import and degradation domain-containing	1324.87	4162.74	0.31827	-1.65168	3.15e-12	8.06e-12
>ENA|ELU41729|ELU41729.1	vacuolar sorting-associated 70	569.856	2805.61	0.203113	-2.29964	6.67e-70	9.17e-69
>ENA|ELU43058|ELU43058.1	vacuolar sorting-associated vps13	446.26	148.172	3.01176	1.59061	1.97e-15	5.96e-15
>ENA|ELU40815|ELU40815.1	vacuole protein	1466.26	487.542	3.00745	1.58854	2.28e-32	1.27e-31
>ENA|ELU35595|ELU35595.1	valine-tRNA ligase	335.686	105.749	3.17438	1.66647	5.33e-20	1.92e-19
>ENA|ELU39270|ELU39270.1	valine-tRNA ligase	472.957	119.654	3.95271	1.98284	3.23e-31	1.74e-30
>ENA|ELU39271|ELU39271.1	valine-tRNA ligase	799.884	175.761	4.55097	2.18617	1.3e-25	5.76e-25
>ENA|ELU42353|ELU42353.1	Velvet domain-containing	1632.38	314.472	5.19085	2.37597	1.04e-61	1.21e-60
>ENA|ELU38953|ELU38953.1	voltage-dependent ion-selective channel	22046.1	7127	3.09332	1.62916	6.16e-20	2.22e-19
>ENA|ELU43595|ELU43595.1	voltage-gated potassium channel beta-2 subunit	3570.47	294.719	12.1148	3.5987	5.16e-147	2.39e-145
>ENA|ELU44078|ELU44078.1	WD-repeat	122.584	407.258	0.300999	-1.73217	2.71e-26	1.23e-25
>ENA|ELU39997|ELU39997.1	WD40 domain-containing	66.4868	433.895	0.153233	-2.70621	5.9e-57	6.15e-56
>ENA|ELU38230|ELU38230.1	WD40 domain-containing	730.469	6016.97	0.121401	-3.04214	5.27e-121	1.72e-119
>ENA|ELU44266|ELU44266.1	WD40 domain-containing protein	472.142	1702.41	0.277337	-1.85029	4.57e-43	3.46e-42
>ENA|ELU37768|ELU37768.1	WGG domain-containing	351.42	65.4327	5.37071	2.42511	5.03e-37	3.19e-36
>ENA|ELU43724|ELU43724.1	YDG SRA domain-containing	100.064	853.242	0.117275	-3.09204	3.2e-88	6.28e-87
>ENA|ELU44915|ELU44915.1	Yippee domain-containing	640.929	1980.66	0.323593	-1.62775	1.01e-25	4.47e-25
>ENA|ELU38898|ELU38898.1	zf- domain-containing	544.141	2313.25	0.235228	-2.08787	3.54e-19	1.24e-18
>ENA|ELU39165|ELU39165.1	zf-C2H2 domain-containing	1027.07	148.597	6.9118	2.78906	2.31e-29	1.17e-28
>ENA|ELU43917|ELU43917.1	zf-C2H2 domain-containing	2825.7	857.333	3.29592	1.72068	1.25e-40	8.83e-40
>ENA|ELU40324|ELU40324.1	zf-C2H2 domain-containing	12499.9	3529.5	3.54154	1.82438	1.28e-31	6.93e-31
>ENA|ELU43935|ELU43935.1	zf-C3HC4 domain-containing	101.513	393.388	0.258048	-1.95429	1.31e-30	6.94e-30
>ENA|ELU41458|ELU41458.1	zf-CCCH domain-containing	1626.72	5530.54	0.294135	-1.76545	1.39e-45	1.13e-44
>ENA|ELU39951|ELU39951.1	zf-DHHC domain-containing protein	228.08	720.551	0.316536	-1.65956	4.23e-29	2.12e-28
>ENA|ELU44198|ELU44198.1	zf-HIT domain-containing	102.157	353.284	0.289163	-1.79004	3.83e-13	1.03e-12
>ENA|ELU37453|ELU37453.1	zf-MYND domain-containing	296.15	958.756	0.308889	-1.69484	1.7e-32	9.5e-32
>ENA|ELU39011|ELU39011.1	zf-rbx1 domain-containing	1678.48	7944.7	0.21127	-2.24284	4.26e-72	6.08e-71
>ENA|ELU42526|ELU42526.1	zf-TRAF domain-containing	420.796	1692.66	0.248601	-2.0081	1.76e-26	8.05e-26
>ENA|ELU43315|ELU43315.1	zinc metalloprotease	1133.83	4036.88	0.280869	-1.83203	2.66e-38	1.76e-37
>ENA|ELU43332|ELU43332.1	zinc metalloprotease	1236.59	4272.13	0.289455	-1.78859	2.55e-16	7.99e-16
>ENA|ELU43443|ELU43443.1	zinc-finger zpr1	1515.76	253.583	5.97737	2.57951	1.22e-71	1.72e-70
>ENA|ELU42281|ELU42281.1	Zip domain-containing	198.386	1190.17	0.166686	-2.58479	1.44e-72	2.07e-71
>ENA|ELU43698|ELU43698.1	ZIP-like iron-zinc transporter	977.642	235.1	4.1584	2.05603	5.8e-45	4.6e-44
>ENA|ELU39531|ELU39531.1	zuotin	3181.41	457.352	6.95615	2.79829	2.68e-94	5.92e-93
>ENA|ELU37672|ELU37672.1	ZZ domain-containing	304.313	1379.35	0.22062	-2.18036	2.32e-57	2.45e-56
